# Supplementary material for: Ascorbic Acid, Corticosteroids and Thiamine in Sepsis (ACTS) protocol and statistical analysis plan: a prospective, multicentre, double-blind, randomised, placebo-controlled clinical trial
Source: PubMed Central journal article supplement — BMJ Open. 2019 Dec 17;9(12):e034406. doi: 10.1136/bmjopen-2019-034406 (PMC6937040; doi:10.1136/bmjopen-2019-034406), 2019-12-17
Supplement: bmjopen-2019-034406.draft_revisions.pdf [file bmjopen-2019-034406.draft_revisions.pdf]

# BMJ Open

BMJ Open is committed to open peer review. As part of this commitment we make the peer review history of every article we publish publicly available.

When an article is published we post the peer reviewers' comments and the authors' responses online. We also post the versions of the paper that were used during peer review. These are the versions that the peer review comments apply to.

The versions of the paper that follow are the versions that were submitted during the peer review process. They are not the versions of record or the final published versions. They should not be cited or distributed as the published version of this manuscript.

BMJ Open is an open access journal and the full, final, typeset and author-corrected version of record of the manuscript is available on our site with no access controls, subscription charges or pay-per-view fees (<http://bmjopen.bmj.com>).

If you have any questions on BMJ Open's open peer review process please email [info.bmjopen@bmj.com](mailto:info.bmjopen@bmj.com)

# BMJ Open

**The Ascorbic Acid, Corticosteroids, and Thiamine in Sepsis (ACTS) Protocol and Statistical Analysis Plan: a prospective, multi-center, double-blind, randomized, placebo controlled, clinical trial**

|                               |                                                                                                                                                                                                                                                                                                                                                                                                          |
|-------------------------------|----------------------------------------------------------------------------------------------------------------------------------------------------------------------------------------------------------------------------------------------------------------------------------------------------------------------------------------------------------------------------------------------------------|
| Journal:                      | <i>BMJ Open</i>                                                                                                                                                                                                                                                                                                                                                                                          |
| Manuscript ID                 | bmjopen-2019-034406                                                                                                                                                                                                                                                                                                                                                                                      |
| Article Type:                 | Protocol                                                                                                                                                                                                                                                                                                                                                                                                 |
| Date Submitted by the Author: | 18-Sep-2019                                                                                                                                                                                                                                                                                                                                                                                              |
| Complete List of Authors:     | Moskowitz, Ari ; Harvard University, Yankama, Tuyen ; Beth Israel Deaconess Medical Center, Andersen, Lars; Aarhus University Hospital Dermato-Venerological Department<br>David T, Huang; University of Pittsburgh<br>Donnino, Michael W.; Beth Israel Deaconess Medical Center<br>Grossestreuer, Anne ; Beth Israel Deaconess Medical Center, Emergency Medicine<br>Clinical Trial Investigators, ACTS |
| Keywords:                     | INFECTIOUS DISEASES, INTENSIVE & CRITICAL CARE, SEPSIS, ASCORBIC ACID, THIAMINE                                                                                                                                                                                                                                                                                                                          |
|                               |                                                                                                                                                                                                                                                                                                                                                                                                          |

SCHOLARONE™  
Manuscripts

1  
2  
3 **The Ascorbic Acid, Corticosteroids, and Thiamine in Sepsis (ACTS) Protocol and Statistical**  
4 **Analysis Plan: a prospective, multi-center, double-blind, randomized, placebo controlled,**  
5 **clinical trial**  
6  
7

8 Authors: Ari Moskowitz MD<sup>1,2\*</sup>, Tuyen T. Yankama MPH<sup>1\*</sup>, Lars W. Andersen, MD, MPH, PhD,  
9 DMSc<sup>1,3</sup>, David T Huang, MD, MPH<sup>4,5</sup>, Michael W. Donnino MD<sup>1,6</sup>, Anne V. Grossestreuer  
10 PhD<sup>1</sup>, for the ACTS Clinical Trial Investigators  
11  
12

13 \*These two authors contributed equally to the work  
14

15 <sup>1</sup> Center for Resuscitation Science, Department of Emergency Medicine, Beth Israel  
16 Deaconess Medical Center, Boston, MA, USA

17 <sup>2</sup> Department of Internal Medicine, Division of Pulmonary, Critical Care, and Sleep Medicine,  
18 Beth Israel Deaconess Medical Center, Boston, MA, USA

19 <sup>3</sup> Research Center for Emergency Medicine, Department of Clinical Medicine, Aarhus  
20 University Hospital and Aarhus University, Aarhus, Denmark

21 <sup>4</sup> Department of Critical Care Medicine, University of Pittsburgh, Pittsburgh, USA

22 <sup>5</sup> Department of Emergency Medicine, University of Pittsburgh, Pittsburgh, USA

23 <sup>6</sup> Department of Medicine, Division of Pulmonary Critical Care, Beth Israel Deaconess  
24 Medical Center, Boston, MA, USA  
25  
26  
27  
28

29 **Corresponding author:**

30 Ari Moskowitz, MD

31 Department of Emergency Medicine

32 Beth Israel Deaconess Medical Center

33 One Deaconess Road

34 Boston MA 02215

35 (617) 754-3463

36 [amoskowi@bidmc.harvard.edu](mailto:amoskowi@bidmc.harvard.edu)  
37  
38  
39  
40  
41  
42  
43  
44  
45  
46  
47  
48  
49  
50  
51  
52  
53  
54  
55  
56  
57  
58  
59  
60

1  
2  
3 **1 Abstract**  
4

5 **2 Introduction:** Septic shock is a common and highly morbid condition. To date, there is no  
6  
7  
8 **3** specific therapy proven to attenuate organ injury in septic shock. Recent studies have  
9  
10  
11 **4** suggested a role for the combination of ascorbic acid, corticosteroids, and thiamine,  
12  
13 **5** although randomized data is lacking.

14  
15 **6 Methods and Analysis:** The Ascorbic Acid, Corticosteroids, and Thiamine in Sepsis (ACTS)  
16  
17  
18 **7** trial is a multi-center, double-blind, randomized, placebo-controlled clinical trial that aims to  
19  
20  
21 **8** determine the impact of ascorbic acid, corticosteroids, and thiamine vs. placebo on organ  
22  
23 **9** injury and mortality in patients with septic shock. Patients are randomized to receive  
24  
25 **10** 1,500mg of ascorbic acid, 100mg of thiamine, and 50mg of hydrocortisone parenterally vs.  
26  
27  
28 **11** matching placebo every 6 hours for 4 days. Clinical and laboratory data are collected at time  
29  
30  
31 **12** of study enrollment, at 24-hours, 72-hours, and at 120-hours. The primary end-point for the  
32  
33 **13** trial is change in the Sequential Organ Failure Assessment (SOFA) score between enrollment  
34  
35 **14** and 72-hours. Additional key secondary outcomes include the incidence of renal failure and  
36  
37 **15** 30-day mortality.

38  
39  
40 **16 Ethics and Dissemination:** The study was approved by the International Review Board (IRB)  
41  
42  
43 **17** of each participating study site. Study findings will be disseminated through peer-reviewed  
44  
45 **18** publications and conference presentations.

46  
47 **19 Trial Registration:** The trial is registered on clinicaltrials.gov (NCT03389555). It was posted  
48  
49  
50 **20** January 3<sup>rd</sup>, 2018.

51  
52 **21**

53  
54 **22**

55  
56 **23**

57  
58  
59 **24**  
60

## 1 **Strengths and Limitations of this Study**

- 2 • No specific therapy has been found to reliably attenuate organ injury in septic shock.
- 3 • This article describes a multicenter, randomized, blinded clinical trial of ascorbic acid,  
4 corticosteroids, and thiamine vs. placebo for the attenuation of organ injury in sepsis.
- 5 • The primary outcome for the trial is change in the Sequential Organ Failure Assessment  
6 (SOFA) score between enrollment and 72-hours after enrollment.
- 7 • The primary outcome will be analyzed using a linear mixed effects model to assess  
8 changes in SOFA score over time.
- 9 • Limitation: 30-day mortality is a secondary outcome for this study, but the trial may be  
10 underpowered for this important patient-centered outcome.

## 1 **Introduction:**

2 The Ascorbic Acid, Corticosteroids, and Thiamine in Sepsis (ACTS) trial was developed to  
3 assess the clinical efficacy and safety of ascorbic acid, hydrocortisone, and thiamine in  
4 patients with septic shock. The rationale for this trial has previously been published by the  
5 trial investigators<sup>1</sup>. We describe our protocol and proposed statistical analysis plan (SAP),  
6 which was designed by the trial chief investigators and statisticians. All analyses specified in  
7 this SAP have been defined prospectively. The complete study protocol can be found on  
8 [clinicaltrials.gov](http://clinicaltrials.gov)<sup>2</sup>.

## 10 **Methods and Analysis:**

### 11 Trial design

12 The ACTS trial is a multicenter, double-blind, randomized, placebo-controlled, parallel  
13 group, superiority trial of ascorbic acid, hydrocortisone, and thiamine in patients with septic  
14 shock. A total of 200 patients will be randomized to receive ascorbic acid (1.5g every 6  
15 hours), hydrocortisone (50mg every 6 hours), and thiamine (100mg every 6 hours) or  
16 placebo for 4 days or until discharge from the intensive care unit (ICU). The primary  
17 hypothesis is that the administration of ascorbic acid, hydrocortisone, and thiamine will lead  
18 to a greater decrease in Sequential Organ Failure Assessment (SOFA) score from enrollment  
19 to 72 hours post-enrollment in patients with septic shock as compared to placebo. The trial  
20 is registered on [clinicaltrials.gov](http://clinicaltrials.gov) (NCT03389555).

### 22 Patient population

- 1  
2  
3 1 Patients will be enrolled from 14 academic centers in the United States. Patients will be  
4  
5 2 enrolled without respect to age, sex, or race. Patients will be enrolled within 24-hours of  
6  
7 3 meeting all inclusion criteria.  
8  
9

10  
11 4

12  
13 *Inclusion criteria*

- 14  
15 1. Age 18 years or older  
16  
17 2. Suspected (cultures drawn and antibiotic given) or confirmed (via culture results) infection  
18  
19 3. Receiving (continuous infusion) a vasopressor agent (norepinephrine, phenylephrine,  
20  
21 epinephrine, dopamine, vasopressin, or angiotensin II) for hypotension related primarily to  
22  
23 sepsis as opposed to another cause of hypotension (e.g. bleeding, cardiogenic shock)  
24  
25  
26  
27  
28  
29

30  
31 *Exclusion criteria*

- 32  
33 1. Member of a protected population (pregnant, prisoner)  
34  
35 2. Known kidney stones within the past 1 year (except for asymptomatic, incidentally noted  
36  
37 stones on imaging)  
38  
39 3. End stage renal disease (ESRD) requiring dialysis\*  
40  
41 4. Known Glucose-6-Phosphate Dehydrogenase deficiency  
42  
43 5. Known Hemachromatosis  
44  
45 6. Comfort Measures Only status  
46  
47 7. Anticipated death within 24-hours despite maximal therapy (as determined by the enrolling  
48  
49 physician)  
50  
51 8. Receiving supplemental thiamine in a dose greater than that contained in a multivitamin  
52  
53 9. Clinical indication for steroids (e.g. chronic use) as determined by the clinical team providing  
54  
55 this drug  
56  
57  
58  
59  
60

- 1  
2  
3 10. Clinical indication for thiamine as determined by the clinical team providing this drug  
4  
5 11. Clinical indication for ascorbic acid as determined by the clinical team providing this drug  
6  
7  
8 12. Known allergy to vitamin C, hydrocortisone, or thiamine  
9

10  
11  
12  
13 1 \*This exclusion criterion was changed from Stage IIIb chronic kidney disease after 19  
14  
15 2 patients were enrolled  
16

17  
18 3  
19  
20 4 Randomization and blinding  
21

22  
23 5 Participants will be randomized in a 1:1 ratio to either the combination of ascorbic acid,  
24  
25 6 hydrocortisone, and thiamine or placebo in blocks with random sizes of 2 or 4. The  
26  
27 7 randomization will be stratified according to site. An independent statistician created the  
28  
29 8 randomization list using a random number generator. With the exception of the research  
30  
31 9 pharmacist (who is not involved in patient care, monitoring, or other study activities), the  
32  
33 10 patient and all clinical and research staff will be blinded to study arm allocation.  
34  
35  
36

37  
38 11  
39  
40 12 Intervention  
41

42 13 Trial participants will be randomized to ascorbic acid (1.5g every 6 hours), hydrocortisone  
43  
44 14 (50mg every 6 hours), and thiamine (100mg every 6 hours) or placebo for 4 days or until  
45  
46 15 discharge from the ICU.  
47  
48  
49

50 16  
51  
52 17 Data Collection and Monitoring Plan  
53

54 18 All data will be collected by local study staff and entered into an online case report form  
55  
56 19 (CRF) using the REDCap Cloud ([www.redcapcloud.com](http://www.redcapcloud.com)) SaaS-based Unified Data  
57  
58  
59  
60



1  
2  
3 1 Management system. Data will be monitored automatically through REDCap Cloud and  
4  
5  
6 2 manually by the data coordinating center.  
7  
8  
9 3

10  
11 4 Interim analyses  
12

13 5 An independent Data Safety and Monitoring Board (DSMB) will review blinded (group A vs  
14  
15 6 group B) data to examine patient characteristics, treatment compliance, outcomes and  
16  
17 7 adverse events, on three occasions (after enrollment of 50, 100, and 150 patients). The trial  
18  
19 8 will not be stopped based on evidence of intervention futility or efficacy. The trial can be  
20  
21 9 stopped for excess mortality in the intervention group. If one group appears to have excess  
22  
23 10 mortality, the DSMB will request unblinding and a detailed evaluation of the two groups and  
24  
25 11 those who died will take place. A recommendation to discontinue the trial for safety would  
26  
27 12 be made only after a thorough review of all available data to ensure that differences were  
28  
29 13 not due to imbalances or extenuating circumstances between the two study groups.  
30  
31  
32  
33  
34  
35  
36  
37  
38  
39  
40  
41  
42  
43  
44  
45  
46  
47  
48  
49  
50  
51  
52  
53  
54  
55  
56  
57  
58  
59  
60

15 Outcomes

16 *Primary outcome*

17 The primary outcome is the absolute change in the SOFA score from enrollment to 72 hours  
18 after enrollment. The SOFA score will be defined using a modification in which the  $\text{SaO}_2/\text{FiO}_2$   
19 ratio is substituted for the  $\text{PaO}_2/\text{FiO}_2$  ratio as has been previously described<sup>3</sup>. This modified  
20 score (Table 1) will be used so that participants without an existing arterial catheter can be  
21 spared arterial puncture.  
22

23 *Key secondary outcomes*

- 24 ● All-cause mortality 30 days after initial study drug administration.

- 1 ● Renal failure within 7 days, which is a composite outcome of all-cause death or KDIGO  
2 stage 3 acute renal failure (as defined in Table 2) within the first 7 days after enrollment.  
3 Patients who met KDIGO 3 acute renal failure criteria at the time of initial study drug  
4 administration would not be identified as having an adverse kidney event unless they  
5 expired within 7 days after enrollment. Patients who were alive, not in the ICU, and had  
6 not developed acute renal failure while in the ICU were assumed to not have renal  
7 failure for the purposes of this analysis.

#### 8 9 *Additional secondary outcomes*

- 10 ● 72-hour change in each individual component of the SOFA score  
11 ● Number of ICU-free days in the first 28 days following enrollment  
12 ● All-cause mortality to ICU discharge and hospital discharge  
13 ● Hospital disposition in patients who survived to hospital discharge  
14 ● Number of shock-free days over the first 7 days after enrollment  
15 ● Number of ventilator-free days over the first 7 days after enrollment  
16 ● Incidence of delirium as measured by the CAM-ICU<sup>4</sup> on study day 3

17 Further information on how secondary outcomes are defined can be found in Table 2.

#### 18 19 *Safety outcomes*

20 Patients enrolled in the trial will be assessed daily during their hospitalization for any  
21 adverse event not anticipated as part of the overall disease process. Expected adverse  
22 events can be found in Table 3. The relatedness of the adverse event to study drug will also  
23 be assessed by the site principal investigator.

24

## 1 Sample size

2 The study sample will have 200 patients (100 per group), providing >99% power to detect a  
3 difference of 2 in the decrease of SOFA score over 72 hours (a decrease of 6 [standard  
4 deviation(SD): 4] in the treatment arm compared to a decrease of 4 [SD: 2] in the placebo  
5 arm) using a t-test of unequal variance and an alpha of 0.05. This was based on preliminary  
6 data from a pre-post study using the same intervention from Marik et al.<sup>6</sup>, which found a  
7 change of 4 in the decrease of SOFA over 72 hours (a decrease of 4.8±2.4 in the treatment  
8 arm compared to a decrease of 0.8±2.7 in the placebo arm).

9  
10 This sample size will allow for adequate power to detect a difference in 30-day mortality.

11 We anticipate that the control group will have a mortality of 40%, based on previous data<sup>6,7</sup>,  
12 <sup>8</sup> and estimate a treatment effect of 50% (risk ratio: 0.50) resulting in a mortality of 20% in  
13 the treatment group. With these estimates, 182 participants will lead to 80% power.

## 14 15 Statistical analysis

### 16 *Analysis principles*

17 Analyses will be conducted on a modified intention-to-treat (ITT) basis: all participants  
18 receiving at least the first dose of the study medications will be analyzed according to the  
19 group to which they were assigned, regardless of treatment compliance after the first dose.  
20 This approach is unbiased while increasing precision in a blinded trial<sup>9</sup>. The analysis will be  
21 performed after the last enrolled patient has been followed to 30 days.

22  
23 The analyses of primary and secondary outcomes will control for site to account for  
24 randomization stratification<sup>10</sup>. Pre-specified subgroup analyses will be conducted regardless

1 of whether a statistically significant treatment effect on the primary outcome is observed in  
2 the overall sample. Covariates included in each analysis are specified in the sections below  
3 and analyses will not be additionally adjusted for potential imbalances in the treatment  
4 groups.

5  
6 No formal adjustments for multiplicity of testing will be applied, but the outcome will be  
7 ordered by degree of importance (i.e., primary versus secondary) and significant test results  
8 will be interpreted in light of the multiple comparisons made.

9  
10 All tests will be two-sided and the nominal level of statistical significance ( $\alpha$ ) will be 5%. All  
11 confidence intervals will have 95% coverage. All statistics will be performed using STATA,  
12 version 15 (College Station, TX, StataCorp LP, USA).

#### 13 14 *Trial profile*

15 The flow of patients through the trial will be shown using a Consolidated Standards of  
16 Reporting Trials diagram (CONSORT)<sup>11</sup>. This will include the number of screened patients  
17 who met study inclusion criteria, the number of patients who were included, and exclusion  
18 reasons for non-included patients.

#### 19 20 *Baseline characteristics*

21 A description of the baseline characteristics will be presented by treatment group (Table 4).  
22 Categorical variables will be summarized by frequencies and percentages. Percentages will  
23 be calculated according to the number of patients for whom data are available. Continuous

1 variables will be summarized using means  $\pm$  SD or medians and first and third quartiles  
2  
3  
4  
5 (IQR). Basic demographic data for all patients screened will be included.  
6  
7

8 3

#### 9 10 4 *Compliance with the administration of study drug*

11  
12  
13 5 The following compliance with study drug variables will be summarized by treatment group:

- 14  
15 6 • Cumulative dose of study drugs received (mg or mg equivalent)
- 16  
17  
18 7 • Overall compliance, defined as the number of doses given divided by the number of  
19  
20 8 expected doses

21  
22  
23 9  
24  
25 10 These variables will be presented as mean  $\pm$  SD or median (IQR).  
26  
27

#### 28 11 29 30 12 *Protocol deviations*

31  
32 13 Protocol deviations will be summarized by treatment group as the number and proportion  
33  
34 14 of deviations by type. Any withdrawals of consent resulting in permanent discontinuation of  
35  
36 15 study drug will also be summarized in this fashion. Timing of withdrawals will be reported.  
37  
38  
39

#### 40 16 41 42 17 *Concomitant therapies*

43  
44 18 The number and proportion of patients receiving open-label thiamine, hydrocortisone, and  
45  
46 19 ascorbic acid during the 4-day study period will be described. Time to first open label use of  
47  
48 20 study drug will be summarized using mean  $\pm$  SD or median (IQR).  
49  
50

#### 51 21 52 53 22 *Analysis of primary outcome*

54  
55 23 The primary hypothesis that the combination of ascorbic acid, hydrocortisone, and thiamine  
56  
57 24 will attenuate organ dysfunction in septic shock will be tested by calculating the group  
58  
59  
60

1  
2  
3 1 difference (intervention vs. placebo) in SOFA score change from baseline to 72 hours using a  
4  
5 2 linear mixed effects model with an appropriate covariance structure. Fixed effects will  
6  
7 3 include age, sex, the allocated treatment, study day (as a categorical variable defined as  
8  
9 4 baseline, 24 hours, 48 hours, and 72 hours), and the interaction between treatment and  
10  
11 5 study day. Study site will be included as a random effect. The placebo group is the reference  
12  
13 6 variable for group, and baseline is the reference variable for time. Means and 95%  
14  
15 7 confidence intervals of SOFA score over time will be presented, by treatment, using  
16  
17 8 longitudinal plots.  
18  
19  
20  
21  
22  
23  
24

25 10 A sensitivity analysis will be performed on the cohort of participants whose SOFA score at 72  
26  
27 11 hours is available (i.e., not missing due to early mortality, hospital discharged, etc) using  
28  
29 12 linear regression. The outcome variable is SOFA score at 72 hours and the predictors are the  
30  
31 13 allocated treatment, baseline SOFA score, and study site.  
32  
33  
34  
35  
36

### 37 15 *Analysis of key secondary outcomes*

38  
39 16 Renal failure: a logistic model controlling for site will be used to compare the incidence of  
40  
41 17 renal failure between the intervention and placebo groups. Results will be reported as odds  
42  
43 18 ratios and 95% confidence intervals.  
44  
45  
46  
47  
48

49 20 A sensitivity analysis will be performed with the composite outcome defined as receipt of  
50  
51 21 renal replacement therapy or death while meeting other elements of KDIGO 3 acute renal  
52  
53 22 failure criteria during the index ICU stay using the method described above.  
54  
55  
56  
57  
58  
59  
60

1  
2  
3 1 30-day mortality: Kaplan-Meier log-rank test and Cox proportional hazards model  
4  
5  
6 2 controlling for site will be used to compare the treatment groups in terms of survival. The  
7  
8 3 outcome variable is 30-day mortality and the predictor is the allocated treatment. If the  
9  
10 4 proportional hazards assumption is not met, a logistic regression controlling for site will be  
11  
12  
13 5 performed to obtain odds ratios with 95% confidence intervals.  
14  
15  
16 6

#### 17 7 *Analysis of additional secondary outcomes*

18  
19  
20 8 The following outcomes will be summarized using mean (SD) or median (IQR) and linear  
21  
22  
23 9 regression controlling for site will be performed to assess the differences between  
24  
25 10 treatment groups.

- 26  
27  
28 11 ● Absolute change in individual components of the SOFA score from enrollment to 72  
29  
30 12 hours
- 31  
32 13 ● Number of ICU-free days in the first 28 days following enrollment
- 33  
34 14 ● Length of hospital stay during index admission
- 35  
36 15 ● Number of days free of mechanical ventilation during the first 7 days after enrollment
- 37  
38 16 ● Number of days free of hemodynamic shock during the first 7 days after enrollment
- 39  
40 17 ● Overall health status at 90 days after randomization will be measured using the SF-36<sup>5</sup>.
- 41  
42  
43  
44  
45 18

46  
47 19 The following outcomes will be summarized using frequencies and percentages and logistic  
48  
49  
50 20 regression will be performed to assess the differences between treatment groups.

- 51  
52 21 ● Survival to ICU discharge and survival to hospital discharge
- 53  
54 22 ● Delirium, as measured by the CAM-ICU, on day 3 of the patient's ICU stay
- 55  
56  
57 23

#### 58 59 24 *Analysis of adverse events*

60

1 Rates of serious expected and unexpected adverse events will be reported by group  
2 assignment. Proportions of patients with adverse events will be compared between the  
3 treatment groups using Fisher's exact test.

#### 4 *Analysis of subgroups*

5 The analysis will include the following pre-defined subgroup analyses for the primary and  
6 key secondary outcomes:

- 7 • Grouped by high/low initial severity of illness. High and low levels will be defined by  
8 a baseline SOFA score above or below the study median.
- 9 • Grouped by high/low baseline serum lactate level. High and low levels will be  
10 defined by a cut-off at a serum lactate  $\geq 3$ mmol/L. This level was chosen to reflect the  
11 population of patients enrolled in our prior pilot randomized trial of thiamine vs.  
12 placebo in septic shock.<sup>7</sup>
- 13 • Grouped by investigator prediction of survival at 30-days. The enrolling provider was  
14 asked at the time of enrollment whether they thought it was likely, unclear, or  
15 unlikely that the patient would be alive at 30-days.
- 16 • Grouped by timing of enrollment with respect to vasopressor start time. Timing will  
17 be defined by a cut-off of 12-hours. This level was chosen based on a review of the  
18 median time to enrollment from the data collected to date.

19 The trial is not powered to detect subgroup differences and these will be considered  
20 exploratory and hypothesis generating.



1  
2  
3 1 Blood samples will be collected as above for the measurement of baseline and subsequent  
4  
5 2 levels of thiamine, ascorbic acid, and cortisol. Exploratory analyses based on this testing will  
6  
7 3 not be presented in the primary trial manuscript, but will be described in follow-up  
8  
9 4 manuscripts.

#### 10 *Missing data*

11  
12  
13  
14  
15  
16  
17  
18 7 If missing data for any key variable (i.e. those used in the primary outcome analysis) are >  
19  
20 8 15%, multiple imputation with chained equations will be performed.  
21  
22  
23  
24

#### 25 Trial progress

26  
27  
28 11 This manuscript describes the SAP for the ACTS trial. The SAP is published prior to  
29  
30 12 unblinding of the study and provides transparency in decisions with respect to statistical  
31  
32 13 analysis. The ACTS trial has now enrolled more than 75% of its intended with recruitment  
33  
34 14 expected to continue through November 2019. As such, 30-day follow-up will be complete  
35  
36 15 for all patients by the end of December 2019. At the time of this submission, treatment  
37  
38 16 allocations remain blinded.  
39  
40  
41  
42  
43  
44

#### 45 **Ethics and Dissemination:**

46  
47 19 The study protocol was approved by the Beth Israel Deaconess Medical Center Committee  
48  
49 20 on Clinical Investigation (protocol 2017P-000436). The Institutional Review Board at each  
50  
51 21 participating site also approved the study protocol. The trial was registered on [clinicaltrials.gov](http://clinicaltrials.gov)  
52  
53 22 (NCT03389555) prior to the enrollment of the first patient. The Food and Drug  
54  
55 23 Administration (FDA) approved an Investigational New Drug (IND) application (IND 136882).  
56  
57 24 Study progress and safety will be monitored by an independent DSMB as described above.  
58  
59  
60

1  
2  
3 1 Informed, written consent will be obtained prior to enrollment from all participants or their  
4  
5  
6 2 legally authorized representatives by trained investigators. Patients and their legally  
7  
8 3 authorized representatives will be made aware that participation is strictly voluntary and  
9  
10 4 that consent can be withdrawn at any time.  
11  
12

13 5  
14  
15 6 Results of this study will be presented at one or more major scientific conferences and will  
16  
17 7 be published in a peer-reviewed scientific journal. Patient level data will be available to the  
18  
19 8 ACTS trial investigator team and to other academic investigators upon request as  
20  
21 9 adjudicated by the ACTS Steering Committee.  
22  
23  
24  
25  
26  
27  
28  
29  
30  
31  
32  
33  
34  
35  
36  
37  
38  
39  
40  
41  
42  
43  
44  
45  
46  
47  
48  
49  
50  
51  
52  
53  
54  
55  
56  
57  
58  
59  
60

## References

1. Moskowitz A, Andersen LW, Huang DT, et al. Ascorbic acid, corticosteroids, and thiamine in sepsis: a review of the biologic rationale and the present state of clinical evaluation. *Critical Care* 2018; 22(1).
2. ClinicalTrials.gov. <https://clinicaltrials.gov/ct2/show/NCT03389555>. Accessed 09 September 2019
3. Pandharipande PP, Shintani AK, Hagerman HE, et al. Derivation and validation of Spo<sub>2</sub>/Fio<sub>2</sub> ratio to impute for Pao<sub>2</sub>/Fio<sub>2</sub> ratio in the respiratory component of the Sequential Organ Failure Assessment score. *Critical care medicine* 2009; 37(4): 1317-132.
4. Ely EW, Inouye SK, Bernard GR, et al. Delirium in mechanically ventilated patients: validity and reliability of the confusion assessment method for the intensive care unit (CAM-ICU). *Jama* 2001; 286(21): 2703-2710.
5. Ware JE, Sherbourne CD. The MOS 36-Item short-form health survey (SF-36): I. conceptual framework and item selection. *Med Care* 1992; 30(6): 473-83.
6. Marik PE, Khangoora V, Rivera R, et al. Hydrocortisone, vitamin c, and thiamine for the treatment of severe sepsis and septic shock: a retrospective before-after study. *Chest* 2017; 151(6): 1229-1238.
7. Rhee C, Dantes R, Epstein L, et al. Incidence and trends of sepsis in US hospitals using clinical vs claims data, 2009-2014. *Jama* 2017; 318(13): 1241-1249.
8. Donnino MW, Andersen LW, Chase M, et al. Randomized, double-blind, placebo-controlled trial of thiamine as a metabolic resuscitator in septic shock: a pilot study. *Crit Care Med* 2016; 44(2): 360367.
9. Fergusson D, Aaron SD, Guyatt G, et al. Post-randomisation exclusions: the intention to treat principle and excluding patients from analysis. *BMJ* 2002; 325(7365): 652-654.
10. Kahan BC, Morris TP. Improper analysis of trials randomised using stratified blocks or minimisation. *Stat Med* 2012 Feb 20; 31(4): 328-40.
11. Boutron I, Moher D, Altman DG, et al. Extending the CONSORT statement to randomized trials of nonpharmacologic treatment: explanation and elaboration. *Ann Intern Med* 2008; 148: 295-309.



1  
2  
3  
4  
5  
6  
7  
8  
9  
10  
11  
12  
13  
14  
15  
16  
17  
18  
19  
20  
21  
22  
23  
24  
25  
26  
27  
28  
29  
30  
31  
32  
33  
34  
35  
36  
37  
38  
39  
40  
41  
42  
43  
44  
45  
46  
47  
48  
49  
50  
51  
52  
53  
54  
55  
56  
57  
58  
59  
60

1 **Tables**

2 Table 1: Modified Sequential Organ Failure Assessment Score

3 Table 2: Definitions of secondary outcomes

4 Table 3: Definitions of adverse events and safety outcomes

5 Table 4: Baseline characteristics of patients stratified by treatment group

For peer review only

Table 1: Modified Sequential organ Failure Assessment Score

| Points | SaO <sub>2</sub> */FiO <sub>2</sub> <sup>§</sup>                        | Blood Pressure                                                      | GCS <sup>  </sup> | Bilirubin (mg/dL) | Creatinine (mg/dL)                             | Platelets (x10 <sup>3</sup> µL) |
|--------|-------------------------------------------------------------------------|---------------------------------------------------------------------|-------------------|-------------------|------------------------------------------------|---------------------------------|
| 0      | >399                                                                    | MAP <sup>#</sup> ≥ 70 mmHg                                          | 15                | <1.2              | <1.2                                           | ≥150                            |
| 1      | 316-399                                                                 | MAP < 70 mmHg                                                       | 13–14             | 1.2–1.9           | 1.2 – 1.9                                      | <150                            |
| 2      | 236-315                                                                 | dopamine ≤ 5 µg/kg/min or dobutamine (any dose)                     | 10–12             | 2–5.9             | 2.0 – 3.4                                      | <100                            |
| 3      | 151-235 (and receiving invasive or non-invasive mechanical ventilation) | dopamine > 5 µg/kg/min, epinephrine/norepinephrine ≤ 0.1 µg/kg/min  | 6–9               | 6–11.9            | 3.5 – 4.9<br>Or<br>UOP <sup>†</sup> <500ml/day | <50                             |
| 4      | <151(and receiving invasive or non-invasive mechanical ventilation)     | dopamine > 15 µg/kg/min, epinephrine/norepinephrine > 0.1 µg/kg/min | <6                | ≥12               | ≥5.0<br>UOP <sup>†</sup> <200ml/day            | <20                             |

\*SaO<sub>2</sub>=Oxygen saturation (%); § = Fraction of inspired oxygen (%); || = Glasgow Coma Scale; # = Mean arterial pressure; † = Urine Output

Table 2: Definitions of secondary outcomes

| Variable                                               | DESCRIPTION                                                                                                                                                                                                                                                                                                                                                                                                                                                                                                                                                                                                                                                                                                             |
|--------------------------------------------------------|-------------------------------------------------------------------------------------------------------------------------------------------------------------------------------------------------------------------------------------------------------------------------------------------------------------------------------------------------------------------------------------------------------------------------------------------------------------------------------------------------------------------------------------------------------------------------------------------------------------------------------------------------------------------------------------------------------------------------|
| KDIGO Stage 3 Renal Injury During Index ICU Stay       | <p>Acute renal failure any time during the index ICU stay. Defined as KDIGO stage 3 based on creatinine or urine output:</p> <p>Creatinine criteria: Increase in serum creatinine to more than 300% (&gt; 3-fold) from baseline (or serum creatinine of more than or equal to 4.0 mg/dl with an acute increase of at least 0.5 mg/dl)</p> <p>Urine output criteria: Less than 0.3 ml/kg per hour for 24 hours or anuria for 12 hours or new renal replacement therapy</p>                                                                                                                                                                                                                                               |
| Number of ICU-Free Days in the first 28 Days           | <p>Number of days during the first 28 days following study enrollment when the patient was not in the ICU or dead (all days after hospital discharge are considered ICU free).</p> <p>Note: patient would be considered “in the ICU” if they were a patient there for ≥6 hours in the course of a day or if they expired prior to 28 days. For example, a patient who expired while still in the ICU on day 5 would have 0 ICU-free days. A patient who was discharged from the ICU on day 3 and readmitted on day 7 and discharged again on day 21 would have 10 ICU free days (days 4-6 and 22-28). A patient who was discharged from the ICU on day 3 and did not return to the ICU would have 25 ICU-free days.</p> |
| Survived to ICU discharge                              | Survived to ICU discharge                                                                                                                                                                                                                                                                                                                                                                                                                                                                                                                                                                                                                                                                                               |
| Survived to Hospital discharge                         | Survived to hospital discharge                                                                                                                                                                                                                                                                                                                                                                                                                                                                                                                                                                                                                                                                                          |
| Hospital Disposition                                   | Hospital disposition in survivors. Extended care facilities include home with service, rehabilitation center, nursing home, skilled nursing facility/extended care 6, hospice (home or inpatient), and transferred to another acute care facility                                                                                                                                                                                                                                                                                                                                                                                                                                                                       |
| Shock free days                                        | Over the first 7 calendar days after enrollment, number of days in which the patient received <6 hours of any vasopressor agent.                                                                                                                                                                                                                                                                                                                                                                                                                                                                                                                                                                                        |
| Invasive Ventilation Free Days                         | Over the first 7 calendar days after enrollment, number of days in which the patient received <6 hours invasive mechanical ventilation.                                                                                                                                                                                                                                                                                                                                                                                                                                                                                                                                                                                 |
| Delirium 72 Hour of ICU Stay (as measured via CAM-ICU) | Delirium on the 3rd day (at approximately 72 hours) after the first study drug dose. Delirium is defined by the Confusion Assessment Method (CAM)-ICU or by the regular CAM if the patient is on the hospital ward.                                                                                                                                                                                                                                                                                                                                                                                                                                                                                                     |
| 90-day quality of life outcome score                   | Scoring is based on SF-36. Lower score defines a less favorable health stage                                                                                                                                                                                                                                                                                                                                                                                                                                                                                                                                                                                                                                            |

Table 3: Definitions of adverse events and safety outcomes

The following definitions will be used:

**Adverse event (AE):** any untoward medical occurrence in a participant to whom a medicinal product is administered and which does not necessarily have a causal relationship with this treatment

**Serious adverse event (SAE):** any untoward medical occurrence that at any dose requires inpatient hospitalization or prolongation of existing hospitalization, results in persistent or significant disability or incapacity, results in a congenital anomaly or birth defect, is life-threatening, or results in death

**Suspected unexpected serious adverse event (SUSAR):** a serious adverse reaction, the nature, severity or outcome of which is not consistent with the reference safety information

| LABEL                  | DESCRIPTION                                                                                                                                                                                                                                                                                                                                                                                                                                                                                                                                                                                                                                                                                                                                                                                                                                                                                      |
|------------------------|--------------------------------------------------------------------------------------------------------------------------------------------------------------------------------------------------------------------------------------------------------------------------------------------------------------------------------------------------------------------------------------------------------------------------------------------------------------------------------------------------------------------------------------------------------------------------------------------------------------------------------------------------------------------------------------------------------------------------------------------------------------------------------------------------------------------------------------------------------------------------------------------------|
| Serious Adverse Events | <p><b>Hyperglycemia:</b> Blood glucose &gt;300mg/dL or new insulin infusion occurring in the first 120-hours after enrollment</p> <p><b>Hyponatremia:</b> Serum sodium (&gt;150 mmol/L) occurring in the first 120-hours after enrollment</p> <p><b>New Infection:</b> As determined by the site principal investigator at each site. Should be a new organism or site of infection and believed to be unrelated to the initial presenting infectious source. Many will have the initiation of new antibiotics or a change in antibiotics.</p> <p><b>Serious allergic reaction:</b> Anaphylaxis or other allergic reaction requiring systemic corticosteroids.</p> <p><b>Renal calculus:</b> Development of a renal calculus between enrollment and 30-day follow-up.</p> <p><b>Others/Unexpected:</b> Any other serious adverse event possibly related to study drug or study participation</p> |
| Related to Study?      | <p><b>Definitely related:</b> no other potential cause of SAE is identified. Investigator certain or near certain the hyperglycemia is related to study drug</p> <p><b>Possibly related:</b> other potential causes of SAE exist. There is at least a 50% chance the hyperglycemia is related to the study drug</p> <p><b>Unlikely related:</b> a clear alternative reason for SAE exists. The investigators believe that there is a &lt;50% chance the SAE is related to study drug</p>                                                                                                                                                                                                                                                                                                                                                                                                         |



1  
2  
3  
4  
5  
6  
7  
8  
9  
10  
11  
12  
13  
14  
15  
16  
17  
18  
19  
20  
21  
22  
23  
24  
25  
26  
27  
28  
29  
30  
31  
32  
33  
34  
35  
36  
37  
38  
39  
40  
41  
42  
43  
44  
45  
46  
47  
48  
49  
50  
51  
52  
53  
54  
55  
56  
57  
58  
59  
60

|                                              |                                                                                                                           |
|----------------------------------------------|---------------------------------------------------------------------------------------------------------------------------|
| Other serious adverse event severity grading | <u>Grade I:</u> Mild; asymptomatic or mild symptoms; clinical or diagnostic observations only; intervention not indicated |
|                                              | <u>Grade II:</u> Moderate; minimal, local or noninvasive intervention indicated                                           |
|                                              | <u>Grade III:</u> Severe or Medically Significant BUT not Immediately Life-threatening                                    |
|                                              | <u>Grade IV:</u> Life-threatening Consequences; urgent intervention indicated                                             |
|                                              | <u>Grade V:</u> Death Related to Adverse Event                                                                            |

For peer review only

Table 4: Baseline characteristics of patients stratified by treatment group

| Characteristics                           | Overall<br>(N = ) | Ascorbic acid,<br>Hydrocortisone,<br>and Thiamine<br>(N = ) | Placebo<br>(N = ) |
|-------------------------------------------|-------------------|-------------------------------------------------------------|-------------------|
| <i>Demographics</i>                       |                   |                                                             |                   |
| Age, yr                                   |                   |                                                             |                   |
| Body mass index, kg/m <sup>2</sup>        |                   |                                                             |                   |
| Female, n (%)                             |                   |                                                             |                   |
| Race, n (%)                               |                   |                                                             |                   |
| African-American                          |                   |                                                             |                   |
| White                                     |                   |                                                             |                   |
| Other                                     |                   |                                                             |                   |
| Past medical history, n (%)               |                   |                                                             |                   |
| None of the below                         |                   |                                                             |                   |
| Coronary artery disease                   |                   |                                                             |                   |
| Cancer                                    |                   |                                                             |                   |
| Congestive heart failure                  |                   |                                                             |                   |
| Chronic obstructive pulmonary disease     |                   |                                                             |                   |
| Dementia/Alzheimer's                      |                   |                                                             |                   |
| Diabetes                                  |                   |                                                             |                   |
| Alcohol use disorder                      |                   |                                                             |                   |
| HIV/AIDS                                  |                   |                                                             |                   |
| Liver disease                             |                   |                                                             |                   |
| Renal disease                             |                   |                                                             |                   |
| Stroke/Transient ischemic attack          |                   |                                                             |                   |
| History of tobacco use                    |                   |                                                             |                   |
| Organ or Bone Marrow Transplant           |                   |                                                             |                   |
| Chronic renal disease stage, n (%)        |                   |                                                             |                   |
| Stage 2                                   |                   |                                                             |                   |
| Stage 3a                                  |                   |                                                             |                   |
| <i>Septic Shock Characteristics</i>       |                   |                                                             |                   |
| Source of sepsis, n (%)                   |                   |                                                             |                   |
| Pneumonia                                 |                   |                                                             |                   |
| Urinary Tract Infection                   |                   |                                                             |                   |
| Intra-Abdominal Infection                 |                   |                                                             |                   |
| Skin or Soft Tissue Infection             |                   |                                                             |                   |
| Vascular Catheter-related Infection       |                   |                                                             |                   |
| Central Nervous System Infection          |                   |                                                             |                   |
| Endocarditis                              |                   |                                                             |                   |
| Infection of Unknown Source               |                   |                                                             |                   |
| Other                                     |                   |                                                             |                   |
| Vasopressors at Time of Study Drug, n (%) |                   |                                                             |                   |
| Norepinephrine                            |                   |                                                             |                   |
| Epinephrine                               |                   |                                                             |                   |
| Phenylephrine                             |                   |                                                             |                   |
| Vasopressin                               |                   |                                                             |                   |

|    |                                                    |  |  |  |
|----|----------------------------------------------------|--|--|--|
| 1  |                                                    |  |  |  |
| 2  |                                                    |  |  |  |
| 3  | Dopamine                                           |  |  |  |
| 4  | Dobutamine                                         |  |  |  |
| 5  | Angiotensin                                        |  |  |  |
| 6  | Milrinone                                          |  |  |  |
| 7  | Midodrine                                          |  |  |  |
| 8  |                                                    |  |  |  |
| 9  | Mechanical ventilation, n (%)                      |  |  |  |
| 10 | Volume of IV fluids <sup>a</sup> , ml              |  |  |  |
| 11 |                                                    |  |  |  |
| 12 | <i>Baseline vital signs</i>                        |  |  |  |
| 13 | Temperature, Celsius                               |  |  |  |
| 14 | Heart rate, beats/minute                           |  |  |  |
| 15 | Systolic blood pressure, mmHg                      |  |  |  |
| 16 | Diastolic blood pressure, mmHg                     |  |  |  |
| 17 | Respiratory rate, inspirations/minute              |  |  |  |
| 18 | Lactate, mmol/L                                    |  |  |  |
| 19 | WBC x10 <sup>9</sup>                               |  |  |  |
| 20 | Creatinine, mg/dL                                  |  |  |  |
| 21 |                                                    |  |  |  |
| 22 |                                                    |  |  |  |
| 23 | <i>ICU physician prediction<sup>b</sup></i>        |  |  |  |
| 24 | Predicted survival at 30 days <sup>b</sup> , n (%) |  |  |  |
| 25 | Very likely                                        |  |  |  |
| 26 | Uncertain                                          |  |  |  |
| 27 | Very unlikely                                      |  |  |  |
| 28 |                                                    |  |  |  |
| 29 | <i>SOFA score</i>                                  |  |  |  |
| 30 | Baseline SOFA score                                |  |  |  |

- 31 a. Volume of IV fluids received in the 12-hours preceding enrollment
- 32 b. At time of enrollment, the physician enrolling the patient is asked to predict 30-day survival.
- 33
- 34
- 35
- 36
- 37
- 38
- 39
- 40
- 41
- 42
- 43
- 44
- 45
- 46
- 47
- 48
- 49
- 50
- 51
- 52
- 53
- 54
- 55
- 56
- 57
- 58
- 59
- 60

1  
2  
3  
4  
5  
6  
7  
8  
9  
10  
11  
12  
13  
14  
15  
16  
17  
18  
19  
20  
21  
22  
23  
24  
25  
26  
27  
28  
29  
30  
31  
32  
33  
34  
35  
36  
37  
38  
39  
40  
41  
42  
43  
44  
45  
46  
47  
48  
49  
50  
51  
52  
53  
54  
55  
56  
57  
58  
59  
60

For peer review only

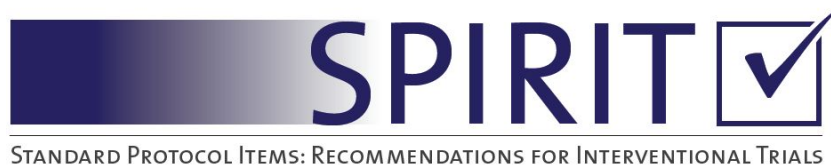

STANDARD PROTOCOL ITEMS: RECOMMENDATIONS FOR INTERVENTIONAL TRIALS

## Ascorbic acid, Corticosteroids, and Thiamine in Sepsis (ACTS) Clinical Trial: SPIRIT 2013 Checklist

| Section/item                      | Item No | Description                                                                                                                                                                                                                                                                              | Page Number on which item is reported |
|-----------------------------------|---------|------------------------------------------------------------------------------------------------------------------------------------------------------------------------------------------------------------------------------------------------------------------------------------------|---------------------------------------|
| <b>Administrative information</b> |         |                                                                                                                                                                                                                                                                                          |                                       |
| Title                             | 1       | Descriptive title identifying the study design, population, interventions, and, if applicable, trial acronym                                                                                                                                                                             | 1                                     |
| Trial registration                | 2a      | Trial identifier and registry name. If not yet registered, name of intended registry                                                                                                                                                                                                     | 2                                     |
|                                   | 2b      | All items from the World Health Organization Trial Registration Data Set                                                                                                                                                                                                                 | 2                                     |
| Protocol version                  | 3       | Date and version identifier                                                                                                                                                                                                                                                              | See referenced full protocol          |
| Funding                           | 4       | Sources and types of financial, material, and other support                                                                                                                                                                                                                              | 18                                    |
| Roles and responsibilities        | 5a      | Names, affiliations, and roles of protocol contributors                                                                                                                                                                                                                                  | 1, 18                                 |
|                                   | 5b      | Name and contact information for the trial sponsor                                                                                                                                                                                                                                       | 18                                    |
|                                   | 5c      | Role of study sponsor and funders, if any, in study design; collection, management, analysis, and interpretation of data; writing of the report; and the decision to submit the report for publication, including whether they will have ultimate authority over any of these activities | 18                                    |
|                                   | 5d      | Composition, roles, and responsibilities of the coordinating centre, steering committee, endpoint adjudication committee, data management team, and other individuals or groups overseeing the trial, if applicable (see Item 21a for data monitoring committee)                         | See referenced full protocol          |
| <b>Introduction</b>               |         |                                                                                                                                                                                                                                                                                          |                                       |

|                                                                                                                |                                                           |     |                                                                                                                                                                                                                                                                                                                                                                                |                              |
|----------------------------------------------------------------------------------------------------------------|-----------------------------------------------------------|-----|--------------------------------------------------------------------------------------------------------------------------------------------------------------------------------------------------------------------------------------------------------------------------------------------------------------------------------------------------------------------------------|------------------------------|
| 1<br>2<br>3<br>4<br>5<br>6<br>7                                                                                | Background and rationale                                  | 6a  | Description of research question and justification for undertaking the trial, including summary of relevant studies (published and unpublished) examining benefits and harms for each intervention                                                                                                                                                                             | 4                            |
| 8<br>9                                                                                                         |                                                           | 6b  | Explanation for choice of comparators                                                                                                                                                                                                                                                                                                                                          | 7                            |
| 10                                                                                                             | Objectives                                                | 7   | Specific objectives or hypotheses                                                                                                                                                                                                                                                                                                                                              | 4                            |
| 11<br>12<br>13<br>14<br>15<br>16                                                                               | Trial design                                              | 8   | Description of trial design including type of trial (eg, parallel group, crossover, factorial, single group), allocation ratio, and framework (eg, superiority, equivalence, noninferiority, exploratory)                                                                                                                                                                      | 4                            |
| 17                                                                                                             | <b>Methods: Participants, interventions, and outcomes</b> |     |                                                                                                                                                                                                                                                                                                                                                                                |                              |
| 18<br>19<br>20<br>21<br>22<br>23<br>24                                                                         | Study setting                                             | 9   | Description of study settings (eg, community clinic, academic hospital) and list of countries where data will be collected. Reference to where list of study sites can be obtained                                                                                                                                                                                             | 5                            |
| 25<br>26<br>27<br>28<br>29<br>30                                                                               | Eligibility criteria                                      | 10  | Inclusion and exclusion criteria for participants. If applicable, eligibility criteria for study centres and individuals who will perform the interventions (eg, surgeons, psychotherapists)                                                                                                                                                                                   | 5                            |
| 31<br>32<br>33<br>34<br>35<br>36<br>37<br>38<br>39<br>40<br>41<br>42<br>43<br>44<br>45<br>46<br>47<br>48<br>49 | Interventions                                             | 11a | Interventions for each group with sufficient detail to allow replication, including how and when they will be administered                                                                                                                                                                                                                                                     | 6                            |
|                                                                                                                |                                                           | 11b | Criteria for discontinuing or modifying allocated interventions for a given trial participant (eg, drug dose change in response to harms, participant request, or improving/worsening disease)                                                                                                                                                                                 | 16                           |
|                                                                                                                |                                                           | 11c | Strategies to improve adherence to intervention protocols, and any procedures for monitoring adherence (eg, drug tablet return, laboratory tests)                                                                                                                                                                                                                              | See referenced full protocol |
|                                                                                                                |                                                           | 11d | Relevant concomitant care and interventions that are permitted or prohibited during the trial                                                                                                                                                                                                                                                                                  | See referenced full protocol |
| 50<br>51<br>52<br>53<br>54<br>55<br>56<br>57<br>58<br>59<br>60                                                 | Outcomes                                                  | 12  | Primary, secondary, and other outcomes, including the specific measurement variable (eg, systolic blood pressure), analysis metric (eg, change from baseline, final value, time to event), method of aggregation (eg, median, proportion), and time point for each outcome. Explanation of the clinical relevance of chosen efficacy and harm outcomes is strongly recommended | 7,8                          |

|                                                                     |     |                                                                                                                                                                                                                                                                                                                                                          |                              |
|---------------------------------------------------------------------|-----|----------------------------------------------------------------------------------------------------------------------------------------------------------------------------------------------------------------------------------------------------------------------------------------------------------------------------------------------------------|------------------------------|
| Participant timeline                                                | 13  | Time schedule of enrolment, interventions (including any run-ins and washouts), assessments, and visits for participants. A schematic diagram is highly recommended (see Figure)                                                                                                                                                                         | See referenced full protocol |
| Sample size                                                         | 14  | Estimated number of participants needed to achieve study objectives and how it was determined, including clinical and statistical assumptions supporting any sample size calculations                                                                                                                                                                    | 9                            |
| Recruitment                                                         | 15  | Strategies for achieving adequate participant enrolment to reach target sample size                                                                                                                                                                                                                                                                      | 9                            |
| <b>Methods: Assignment of interventions (for controlled trials)</b> |     |                                                                                                                                                                                                                                                                                                                                                          |                              |
| Allocation:                                                         |     |                                                                                                                                                                                                                                                                                                                                                          |                              |
| Sequence generation                                                 | 16a | Method of generating the allocation sequence (eg, computer-generated random numbers), and list of any factors for stratification. To reduce predictability of a random sequence, details of any planned restriction (eg, blocking) should be provided in a separate document that is unavailable to those who enrol participants or assign interventions | 6                            |
| Allocation concealment mechanism                                    | 16b | Mechanism of implementing the allocation sequence (eg, central telephone; sequentially numbered, opaque, sealed envelopes), describing any steps to conceal the sequence until interventions are assigned                                                                                                                                                | 6                            |
| Implementation                                                      | 16c | Who will generate the allocation sequence, who will enrol participants, and who will assign participants to interventions                                                                                                                                                                                                                                | 6                            |
| Blinding (masking)                                                  | 17a | Who will be blinded after assignment to interventions (eg, trial participants, care providers, outcome assessors, data analysts), and how                                                                                                                                                                                                                | 6                            |
|                                                                     | 17b | If blinded, circumstances under which unblinding is permissible, and procedure for revealing a participant's allocated intervention during the trial                                                                                                                                                                                                     | 6                            |
| <b>Methods: Data collection, management, and analysis</b>           |     |                                                                                                                                                                                                                                                                                                                                                          |                              |

|                                                          |                            |     |                                                                                                                                                                                                                                                                                                                                                                                                              |                              |
|----------------------------------------------------------|----------------------------|-----|--------------------------------------------------------------------------------------------------------------------------------------------------------------------------------------------------------------------------------------------------------------------------------------------------------------------------------------------------------------------------------------------------------------|------------------------------|
| 1<br>2<br>3<br>4<br>5<br>6<br>7<br>8<br>9<br>10<br>11    | Data collection methods    | 18a | Plans for assessment and collection of outcome, baseline, and other trial data, including any related processes to promote data quality (eg, duplicate measurements, training of assessors) and a description of study instruments (eg, questionnaires, laboratory tests) along with their reliability and validity, if known. Reference to where data collection forms can be found, if not in the protocol | 6                            |
| 12<br>13<br>14<br>15<br>16<br>17                         |                            | 18b | Plans to promote participant retention and complete follow-up, including list of any outcome data to be collected for participants who discontinue or deviate from intervention protocols                                                                                                                                                                                                                    | 6                            |
| 18<br>19<br>20<br>21<br>22<br>23<br>24<br>25             | Data management            | 19  | Plans for data entry, coding, security, and storage, including any related processes to promote data quality (eg, double data entry; range checks for data values). Reference to where details of data management procedures can be found, if not in the protocol                                                                                                                                            | 6                            |
| 26<br>27<br>28<br>29<br>30<br>31                         | Statistical methods        | 20a | Statistical methods for analysing primary and secondary outcomes. Reference to where other details of the statistical analysis plan can be found, if not in the protocol                                                                                                                                                                                                                                     | 9-13                         |
| 32<br>33<br>34                                           |                            | 20b | Methods for any additional analyses (eg, subgroup and adjusted analyses)                                                                                                                                                                                                                                                                                                                                     | 9-13                         |
| 35<br>36<br>37<br>38<br>39<br>40                         |                            | 20c | Definition of analysis population relating to protocol non-adherence (eg, as randomised analysis), and any statistical methods to handle missing data (eg, multiple imputation)                                                                                                                                                                                                                              | 9-13                         |
| 41<br>42                                                 | <b>Methods: Monitoring</b> |     |                                                                                                                                                                                                                                                                                                                                                                                                              |                              |
| 43<br>44<br>45<br>46<br>47<br>48<br>49<br>50<br>51<br>52 | Data monitoring            | 21a | Composition of data monitoring committee (DMC); summary of its role and reporting structure; statement of whether it is independent from the sponsor and competing interests; and reference to where further details about its charter can be found, if not in the protocol. Alternatively, an explanation of why a DMC is not needed                                                                        | See referenced full protocol |
| 53<br>54<br>55<br>56<br>57<br>58<br>59<br>60             |                            | 21b | Description of any interim analyses and stopping guidelines, including who will have access to these interim results and make the final decision to terminate the trial                                                                                                                                                                                                                                      | 7                            |



|                                 |     |                                                                                                                                                                                                                                                                                     |                                    |
|---------------------------------|-----|-------------------------------------------------------------------------------------------------------------------------------------------------------------------------------------------------------------------------------------------------------------------------------------|------------------------------------|
| Harms                           | 22  | Plans for collecting, assessing, reporting, and managing solicited and spontaneously reported adverse events and other unintended effects of trial interventions or trial conduct                                                                                                   | 14                                 |
| Auditing                        | 23  | Frequency and procedures for auditing trial conduct, if any, and whether the process will be independent from investigators and the sponsor                                                                                                                                         | Information available upon request |
| <b>Ethics and dissemination</b> |     |                                                                                                                                                                                                                                                                                     |                                    |
| Research ethics approval        | 24  | Plans for seeking research ethics committee/institutional review board (REC/IRB) approval                                                                                                                                                                                           | 15                                 |
| Protocol amendments             | 25  | Plans for communicating important protocol modifications (eg, changes to eligibility criteria, outcomes, analyses) to relevant parties (eg, investigators, REC/IRBs, trial participants, trial registries, journals, regulators)                                                    | Information available upon request |
| Consent or assent               | 26a | Who will obtain informed consent or assent from potential trial participants or authorised surrogates, and how (see Item 32)                                                                                                                                                        | 16                                 |
|                                 | 26b | Additional consent provisions for collection and use of participant data and biological specimens in ancillary studies, if applicable                                                                                                                                               | Information available upon request |
| Confidentiality                 | 27  | How personal information about potential and enrolled participants will be collected, shared, and maintained in order to protect confidentiality before, during, and after the trial                                                                                                | 6                                  |
| Declaration of interests        | 28  | Financial and other competing interests for principal investigators for the overall trial and each study site                                                                                                                                                                       | 18                                 |
| Access to data                  | 29  | Statement of who will have access to the final trial dataset, and disclosure of contractual agreements that limit such access for investigators                                                                                                                                     | 16                                 |
| Ancillary and post-trial care   | 30  | Provisions, if any, for ancillary and post-trial care, and for compensation to those who suffer harm from trial participation                                                                                                                                                       | N/A                                |
| Dissemination policy            | 31a | Plans for investigators and sponsor to communicate trial results to participants, healthcare professionals, the public, and other relevant groups (eg, via publication, reporting in results databases, or other data sharing arrangements), including any publication restrictions | 16                                 |

|                            |     |                                                                                                                                                                                                |                              |
|----------------------------|-----|------------------------------------------------------------------------------------------------------------------------------------------------------------------------------------------------|------------------------------|
|                            | 31b | Authorship eligibility guidelines and any intended use of professional writers                                                                                                                 | See referenced full protocol |
|                            | 31c | Plans, if any, for granting public access to the full protocol, participant-level dataset, and statistical code                                                                                | 16                           |
| <b>Appendices</b>          |     |                                                                                                                                                                                                |                              |
| Informed consent materials | 32  | Model consent form and other related documentation given to participants and authorised surrogates                                                                                             | Available upon request       |
| Biological specimens       | 33  | Plans for collection, laboratory evaluation, and storage of biological specimens for genetic or molecular analysis in the current trial and for future use in ancillary studies, if applicable | See referenced full protocol |

# BMJ Open

**The Ascorbic Acid, Corticosteroids, and Thiamine in Sepsis (ACTS) Protocol and Statistical Analysis Plan: a prospective, multi-center, double-blind, randomized, placebo controlled, clinical trial**

|                                 |                                                                                                                                                                                                                                                                                                                                                                                                          |
|---------------------------------|----------------------------------------------------------------------------------------------------------------------------------------------------------------------------------------------------------------------------------------------------------------------------------------------------------------------------------------------------------------------------------------------------------|
| Journal:                        | <i>BMJ Open</i>                                                                                                                                                                                                                                                                                                                                                                                          |
| Manuscript ID                   | bmjopen-2019-034406.R1                                                                                                                                                                                                                                                                                                                                                                                   |
| Article Type:                   | Protocol                                                                                                                                                                                                                                                                                                                                                                                                 |
| Date Submitted by the Author:   | 01-Nov-2019                                                                                                                                                                                                                                                                                                                                                                                              |
| Complete List of Authors:       | Moskowitz, Ari ; Harvard University, Yankama, Tuyen ; Beth Israel Deaconess Medical Center, Andersen, Lars; Aarhus University Hospital Dermato-Venerological Department<br>David T, Huang; University of Pittsburgh<br>Donnino, Michael W.; Beth Israel Deaconess Medical Center<br>Grossestreuer, Anne ; Beth Israel Deaconess Medical Center, Emergency Medicine<br>Clinical Trial Investigators, ACTS |
| <b>Primary Subject Heading</b>: | Intensive care                                                                                                                                                                                                                                                                                                                                                                                           |
| Secondary Subject Heading:      | Research methods, Nutrition and metabolism, Infectious diseases                                                                                                                                                                                                                                                                                                                                          |
| Keywords:                       | INFECTIOUS DISEASES, INTENSIVE & CRITICAL CARE, SEPSIS, ASCORBIC ACID, THIAMINE                                                                                                                                                                                                                                                                                                                          |
|                                 |                                                                                                                                                                                                                                                                                                                                                                                                          |

SCHOLARONE™  
Manuscripts

1  
2  
3 **The Ascorbic Acid, Corticosteroids, and Thiamine in Sepsis (ACTS) Protocol and Statistical**  
4 **Analysis Plan: a prospective, multi-center, double-blind, randomized, placebo controlled,**  
5 **clinical trial**  
6  
7

8 Authors: Ari Moskowitz MD<sup>1,2\*</sup>, Tuyen T. Yankama MPH<sup>1\*</sup>, Lars W. Andersen, MD, MPH, PhD,  
9 DMSc<sup>1,3</sup>, David T Huang, MD, MPH<sup>4,5</sup>, Michael W. Donnino MD<sup>1,6</sup>, Anne V. Grossestreuer  
10 PhD<sup>1</sup>, for the ACTS Clinical Trial Investigators  
11  
12

13 \*These two authors contributed equally to the work  
14

15 <sup>1</sup> Center for Resuscitation Science, Department of Emergency Medicine, Beth Israel  
16 Deaconess Medical Center, Boston, MA, USA

17 <sup>2</sup> Department of Internal Medicine, Division of Pulmonary, Critical Care, and Sleep Medicine,  
18 Beth Israel Deaconess Medical Center, Boston, MA, USA

19 <sup>3</sup> Research Center for Emergency Medicine, Department of Clinical Medicine, Aarhus  
20 University Hospital and Aarhus University, Aarhus, Denmark

21 <sup>4</sup> Department of Critical Care Medicine, University of Pittsburgh, Pittsburgh, USA

22 <sup>5</sup> Department of Emergency Medicine, University of Pittsburgh, Pittsburgh, USA

23 <sup>6</sup> Department of Medicine, Division of Pulmonary Critical Care, Beth Israel Deaconess  
24 Medical Center, Boston, MA, USA  
25  
26  
27  
28

29 **Corresponding author:**

30 Ari Moskowitz, MD  
31 Department of Emergency Medicine  
32 Beth Israel Deaconess Medical Center  
33 One Deaconess Road  
34 Boston MA 02215  
35 (617) 754-3463  
36 [amoskowi@bidmc.harvard.edu](mailto:amoskowi@bidmc.harvard.edu)  
37  
38  
39  
40  
41  
42  
43  
44  
45  
46  
47  
48  
49  
50  
51  
52  
53  
54  
55  
56  
57  
58  
59  
60

1  
2  
3 **1 Abstract**  
4

5 **2 Introduction:** Septic shock is a common and highly morbid condition. To date, there is no  
6  
7  
8 **3** specific therapy proven to attenuate organ injury in septic shock. Recent studies have  
9  
10  
11 **4** suggested a role for the combination of ascorbic acid, corticosteroids, and thiamine,  
12  
13 **5** although randomized data is lacking.

14  
15 **6 Methods and Analysis:** The Ascorbic Acid, Corticosteroids, and Thiamine in Sepsis (ACTS)  
16  
17  
18 **7** trial is a multi-center, double-blind, randomized, placebo-controlled clinical trial that aims to  
19  
20  
21 **8** determine the impact of ascorbic acid, corticosteroids, and thiamine vs. placebo on organ  
22  
23 **9** injury and mortality in patients with septic shock. Patients are randomized to receive  
24  
25 **10** 1,500mg of ascorbic acid, 100mg of thiamine, and 50mg of hydrocortisone parenterally vs.  
26  
27  
28 **11** matching placebo every 6 hours for 4 days. Clinical and laboratory data are collected at time  
29  
30  
31 **12** of study enrollment, at 24-hours, 72-hours, and at 120-hours. The primary end-point for the  
32  
33 **13** trial is change in the Sequential Organ Failure Assessment (SOFA) score between enrollment  
34  
35 **14** and 72-hours. Additional key secondary outcomes include the incidence of renal failure and  
36  
37 **15** 30-day mortality.

38  
39  
40 **16 Ethics and Dissemination:** The study was approved by the International Review Board (IRB)  
41  
42  
43 **17** of each participating study site. Study findings will be disseminated through peer-reviewed  
44  
45 **18** publications and conference presentations.

46  
47 **19 Trial Registration:** The trial is registered on clinicaltrials.gov (NCT03389555). It was posted  
48  
49  
50 **20** January 3<sup>rd</sup>, 2018.

51  
52 **21**

53  
54 **22**

55  
56 **23**

57  
58  
59 **24**  
60

## 1 **Strengths and Limitations of this Study**

- 2 • No specific therapy has been found to reliably attenuate organ injury in septic shock.
- 3 • In observational studies, the combination of ascorbic acid, corticosteroids, and thiamine
- 4 has been shown to attenuate organ injury and improve mortality in septic shock.
- 5 • This article describes a multicenter, randomized, blinded clinical trial of ascorbic acid,
- 6 corticosteroids, and thiamine vs. placebo in septic shock.
- 7 • The primary outcome for the trial is change in the Sequential Organ Failure Assessment
- 8 (SOFA) score between enrollment and 72-hours after enrollment, which will be analyzed
- 9 using a linear mixed effects model to assess changes in SOFA score over time.
- 10 • 30-day mortality is a secondary outcome for this study, but the trial may be
- 11 underpowered for this important patient-centered outcome.

## 1 **Introduction:**

2 The Ascorbic Acid, Corticosteroids, and Thiamine in Sepsis (ACTS) trial was developed to  
3 assess the clinical efficacy and safety of ascorbic acid, hydrocortisone, and thiamine in  
4 patients with septic shock. The rationale for this trial has previously been published by the  
5 trial investigators<sup>1</sup>. In short, there is presently no directed therapy proven to attenuate  
6 organ injury in septic shock. Whereas the traditional paradigm of organ injury in sepsis has  
7 focused on impaired oxygen delivery, there is increasing evidence that non-oxygen delivery  
8 dependent mechanisms of organ injury may play an important role. In particular,  
9 mitochondrial dysfunction has been recognized as a likely contributor to organ injury in  
10 many sepsis victims.<sup>2,3</sup> Ascorbic acid, a potent antioxidant, and thiamine, a key co-factor in  
11 aerobic respiration, may have roles as mitochondrial resuscitators in septic shock. In  
12 observational studies and small clinical trials, both ascorbic acid and thiamine have shown  
13 promise as directed therapies for the attenuation of organ injury in sepsis.<sup>4,5</sup> More recently,  
14 a phase II clinical trial of high-dose ascorbic acid in sepsis victims with the acute respiratory  
15 distress syndrome found that the intervention was safe and may have improved mortality.  
16 Notably however, ascorbic acid did not attenuate organ injury as measured by the  
17 sequential organ failure assessment (SOFA) score, although this may have resulted from an  
18 imbalance in early mortality between groups, resulting in excess missing data from the  
19 sickest patients in the placebo arm.<sup>6</sup>

20  
21 Herein we describe the protocol and proposed statistical analysis plan (SAP) for the ACTS  
22 trial, which was designed by the trial chief investigators and statisticians. All analyses  
23 specified in this SAP have been defined prospectively. The complete study protocol can be  
24 found on [clinicaltrials.gov](http://clinicaltrials.gov)<sup>7</sup>.

1  
2  
3 1  
4  
5  
6 2**Methods and Analysis:**7  
8 3 Trial design  
9

10 4 The ACTS trial is a multicenter, double-blind, randomized, placebo-controlled, parallel  
11  
12  
13 5 group, superiority trial of ascorbic acid, hydrocortisone, and thiamine in patients with septic  
14  
15 6 shock. A total of 200 patients will be randomized to receive ascorbic acid (1.5g every 6  
16  
17 7 hours), hydrocortisone (50mg every 6 hours), and thiamine (100mg every 6 hours) or  
18  
19 8 placebo for 4 days or until discharge from the intensive care unit (ICU). The primary  
20  
21 9 hypothesis is that the administration of ascorbic acid, hydrocortisone, and thiamine will lead  
22  
23 10 to a greater decrease in Sequential Organ Failure Assessment (SOFA) score from enrollment  
24  
25 11 to 72 hours post-enrollment in patients with septic shock as compared to placebo. The trial  
26  
27 12 is registered on [clinicaltrials.gov](http://clinicaltrials.gov) (NCT03389555).  
28  
29  
30  
31  
32  
33  
34

35 14 Patient population  
36

37 15 Patients will be enrolled from 14 academic centers in the United States. Patients will be  
38  
39 16 enrolled without respect to age, sex, or race. Patients will be enrolled within 24-hours of  
40  
41 17 meeting all inclusion criteria.  
42  
43  
44  
45  
46

47 *Inclusion criteria*  
48

- 49 1. Age 18 years or older
- 50  
51 2. Suspected (cultures drawn and antibiotic given) or confirmed (via culture results) infection
- 52  
53 3. Receiving (continuous infusion) a vasopressor agent (norepinephrine, phenylephrine,  
54  
55 epinephrine, dopamine, vasopressin, or angiotensin II) for hypotension related primarily to  
56  
57 sepsis as opposed to another cause of hypotension (e.g. bleeding, cardiogenic shock)  
58  
59  
60



### *Exclusion criteria*

1. Member of a protected population (pregnant, prisoner)
2. Known kidney stones within the past 1 year (except for asymptomatic, incidentally noted stones on imaging)
3. End stage renal disease (ESRD) requiring dialysis\*
4. Known Glucose-6-Phosphate Dehydrogenase deficiency
5. Known Hemochromatosis
6. Comfort Measures Only status
7. Anticipated death within 24-hours despite maximal therapy (as determined by the enrolling physician)
8. Receiving supplemental thiamine in a dose greater than that contained in a multivitamin
9. Clinical indication for steroids (e.g. chronic use) as determined by the clinical team providing this drug
10. Clinical indication for thiamine as determined by the clinical team providing this drug
11. Clinical indication for ascorbic acid as determined by the clinical team providing this drug
12. Known allergy to vitamin C, hydrocortisone, or thiamine

1 \*This exclusion criterion was changed from Stage IIIb chronic kidney disease after 19  
2 patients were enrolled

3

### 4 Randomization and blinding

5 Participants will be randomized in a 1:1 ratio to either the combination of ascorbic acid,  
6 hydrocortisone, and thiamine or placebo in blocks with random sizes of 2 or 4. The

1 randomization will be stratified according to site. An independent statistician created the  
2 randomization list using a random number generator. Each site's randomization list will be  
3 held by the local research pharmacy, which then will inform the research team of treatment  
4 allocation at the time of randomization. With the exception of the research pharmacist (who  
5 is not involved in patient care, monitoring, or other study activities), the patient and all  
6 clinical and research staff will be blinded to study arm allocation.

7  
8 As ascorbic acid possesses a yellow tinge, the bags containing ascorbic acid will be covered  
9 with light-protective bags. In testing, after dilution there was no distinguishing  
10 characteristics of the ascorbic acid vs. placebo in the intravenous line tubing. Ascorbic acid,  
11 hydrocortisone, and thiamine are not known to have distinctive rapid effects which could  
12 lead to unblinding.

#### 14 Intervention

15 Trial participants will be randomized to ascorbic acid (1.5g every 6 hours), hydrocortisone  
16 (50mg every 6 hours), and thiamine (100mg every 6 hours) or placebo for 4 days or until  
17 discharge from the ICU. The ascorbic acid and thiamine will be diluted in 100ml of 0.9%NaCl  
18 crystalloid fluid and the hydrocortisone was given as a 'push' dose.

19  
20 A placebo (as opposed to a hydrocortisone only control arm) was selected to allow for  
21 clinician discretion with regards to the use of corticosteroids in septic shock, thus avoiding  
22 potential deviations from 'usual care' associated with the comparison of two fixed  
23 treatment arms. We note that study enrollment began prior to publication of the ADRENAL  
24 and APPROCHS trials<sup>8,9</sup>.

1  
2  
3 1  
4  
5  
6 2

### Data Collection and Monitoring Plan

3 All data will be collected by local study staff and entered into an online case report form  
4 (CRF) using the REDCap Cloud ([www.redcapcloud.com](http://www.redcapcloud.com)) SaaS-based Unified Data  
5 Management system. Data will be monitored automatically through REDCap Cloud and  
6 manually by the data coordinating center. In-person site visits by study monitors will be  
7 conducted at each site early in study enrollment and again at study close-out for verification  
8 of primary data, regulatory processes, and pharmacy standards.

9  
10

### Patient and Public Involvement

11 No patients will be involved in the design, recruitment, or conduct of the study. We  
12 anticipate disseminating the results of the study through publication in a high-impact  
13 scientific journal. Patients or their representatives will assess the burden of the intervention  
14 at the time of randomization through the informed consent process.

15  
16

### Interim analyses

17 An independent Data Safety and Monitoring Board (DSMB) will review blinded (group A vs  
18 group B) data to examine patient characteristics, treatment compliance, outcomes and  
19 adverse events, on three occasions (after enrollment of 50, 100, and 150 patients). The trial  
20 will not be stopped based on evidence of intervention futility or efficacy. The trial can be  
21 stopped for excess mortality in the intervention group. If one group appears to have excess  
22 mortality, the DSMB will request unblinding and a detailed evaluation of the two groups and  
23 those who died will take place. A recommendation to discontinue the trial for safety would

1  
2  
3 1 be made only after a thorough review of all available data to ensure that differences were  
4  
5  
6 2 not due to imbalances or extenuating circumstances between the two study groups.  
7

8 3

9  
10 4 Outcomes

11  
12  
13 5 *Primary outcome*

14  
15 6 The primary outcome is the absolute change in the SOFA score from enrollment to 72 hours  
16  
17 7 after enrollment. The SOFA score will be defined using a modification in which the SaO<sub>2</sub>/FiO<sub>2</sub>  
18  
19 8 ratio is substituted for the PaO<sub>2</sub>/FiO<sub>2</sub> ratio as has been previously described<sup>10</sup>. This modified  
20  
21 9 score (Table 1) will be used so that participants without an existing arterial catheter can be  
22  
23 10 spared arterial puncture.  
24  
25  
26  
27

28 11

29  
30 12 *Key secondary outcomes*

- 31  
32 13 ● All-cause mortality 30 days after initial study drug administration.  
33  
34 14 ● Renal failure within 7 days, which is a composite outcome of all-cause death or KDIGO  
35  
36 15 stage 3 acute renal failure (as defined in Table 2) within the first 7 days after enrollment.  
37  
38 16 Patients who met KDIGO 3 acute renal failure criteria at the time of initial study drug  
39  
40 17 administration would not be identified as having an adverse kidney event unless they  
41  
42 18 died within 7 days after enrollment. Patients who were alive, not in the ICU, and had not  
43  
44 19 developed acute renal failure while in the ICU were assumed to not have renal failure for  
45  
46 20 the purposes of this analysis.  
47  
48  
49  
50

51 21

52  
53  
54 22 *Additional secondary outcomes*

- 55  
56  
57 23 ● 72-hour change in each individual component of the SOFA score  
58  
59 24 ● Number of ICU-free days in the first 28 days following enrollment  
60

- 1 ● All-cause mortality to ICU discharge and hospital discharge
  - 2 ● Hospital disposition in patients who survived to hospital discharge
  - 3 ● Number of shock-free days over the first 7 days after enrollment
  - 4 ● Number of ventilator-free days over the first 7 days after enrollment
  - 5 ● Incidence of delirium as measured by the CAM-ICU<sup>11</sup> on study day 3
- 6 Further information on how secondary outcomes are defined can be found in Table 2.

### 8 *Safety outcomes*

9 Patients enrolled in the trial will be assessed daily during their hospitalization for any  
10 adverse event not anticipated as part of the overall disease process. Expected adverse  
11 events can be found in Table 3. The relatedness of the adverse event to study drug will also  
12 be assessed by the site principal investigator.

### 14 Sample size

15 The study sample will have 200 evaluable patients (100 per group), providing >99% power  
16 to detect a difference of 2 in the decrease of SOFA score over 72 hours (a decrease of 6  
17 [standard deviation(SD): 4] in the treatment arm compared to a decrease of 4 [SD: 2] in the  
18 placebo arm) using a t-test of unequal variance and an alpha of 0.05. This was based on  
19 preliminary data from a pre-post study using the same intervention from Marik et al.<sup>12</sup>,  
20 which found a change of 4 in the decrease of SOFA over 72 hours (a decrease of 4.8±2.4 in  
21 the treatment arm compared to a decrease of 0.8±2.7 in the placebo arm).

23 This sample size will allow for adequate power to detect a difference in 30-day mortality.

24 We anticipate that the control group will have a mortality of 40%, based on previous data<sup>5</sup>.

1 12,13 and estimate a treatment effect of 50% (risk ratio: 0.50) resulting in a mortality of 20%  
2 in the treatment group. With these estimates, 182 participants will lead to 80% power.

3

#### 4 Statistical analysis

##### 5 *Analysis principles*

6 Analyses will be conducted on a modified intention-to-treat (ITT) basis: all participants  
7 receiving at least the first dose of the study medications will be analyzed according to the  
8 group to which they were assigned, regardless of treatment compliance after the first dose.  
9 This approach is unbiased while increasing precision in a blinded trial<sup>14</sup>. The analysis will be  
10 performed after the last enrolled patient has been followed to 30 days.

11  
12 The analyses of primary and secondary outcomes will control for site to account for  
13 randomization stratification<sup>15</sup>. Pre-specified subgroup analyses will be conducted regardless  
14 of whether a statistically significant treatment effect on the primary outcome is observed in  
15 the overall sample. Covariates included in each analysis are specified in the sections below  
16 and analyses will not be additionally adjusted for potential imbalances in the treatment  
17 groups.

18  
19 No formal adjustments for multiplicity of testing will be applied, but the outcome will be  
20 ordered by degree of importance (i.e., primary versus secondary) and significant test results  
21 will be interpreted in light of the multiple comparisons made.

22

1 All tests will be two-sided and the nominal level of statistical significance ( $\alpha$ ) will be 5%. All  
2 confidence intervals will have 95% coverage. All statistics will be performed using STATA,  
3 version 15 (College Station, TX, StataCorp LP, USA).

#### 4 5 *Trial profile*

6 The flow of patients through the trial will be shown using a Consolidated Standards of  
7 Reporting Trials diagram (CONSORT)<sup>16</sup>. This will include the number of screened patients  
8 who met study inclusion criteria, the number of patients who were included, and exclusion  
9 reasons for non-included patients.

#### 10 11 *Baseline characteristics*

12 A description of the baseline characteristics will be presented by treatment group (Table 4).  
13 Categorical variables will be summarized by frequencies and percentages. Percentages will  
14 be calculated according to the number of patients for whom data are available. Continuous  
15 variables will be summarized using means  $\pm$  SD or medians and first and third quartiles  
16 (IQR). Basic demographic data for all patients screened will be included.

#### 17 18 *Compliance with the administration of study drug*

19 The following compliance with study drug variables will be summarized by treatment group:

- 20 ● Cumulative dose of study drugs received (mg or mg equivalent)
- 21 ● Overall compliance, defined as the number of doses given divided by the number of  
22 expected doses

23  
24 These variables will be presented as mean  $\pm$  SD or median (IQR).

1  
2  
3 1  
4  
5  
6 2*Protocol deviations*

3 Protocol deviations will be summarized by treatment group as the number and proportion  
4 of deviations by type. Any withdrawals of consent resulting in permanent discontinuation of  
5 study drug will also be summarized in this fashion. Timing of withdrawals will be reported.

6  
7*Concomitant therapies*

8 The number and proportion of patients receiving open-label thiamine, hydrocortisone, and  
9 ascorbic acid during the 4-day study period will be described. Time to first open label use of  
10 study drug will be summarized using mean  $\pm$  SD or median (IQR).

11  
12*Analysis of primary outcome*

13 The primary hypothesis that the combination of ascorbic acid, hydrocortisone, and thiamine  
14 will attenuate organ dysfunction in septic shock will be tested by calculating the group  
15 difference (intervention vs. placebo) in SOFA score change from baseline to 72 hours using a  
16 linear mixed effects model with an appropriate covariance structure. Fixed effects will  
17 include age, sex, the allocated treatment, study day (as a categorical variable defined as  
18 baseline, 24 hours, 48 hours, and 72 hours), and the interaction between treatment and  
19 study day. Study site will be included as a random effect. The placebo group is the reference  
20 variable for group, and baseline is the reference variable for time. Means and 95%  
21 confidence intervals of SOFA score over time will be presented, by treatment, using  
22 longitudinal plots.

23  
24  
25  
26  
27  
28  
29  
30  
31  
32  
33  
34  
35  
36  
37  
38  
39  
40  
41  
42  
43  
44  
45  
46  
47  
48  
49  
50  
51  
52  
53  
54  
55  
56  
57  
58  
59  
60



1  
2  
3 1 If a patient is missing an element of the SOFA score for reasons other than death or early  
4  
5 2 hospital discharge (e.g. laboratory error), we will use the available value in closest temporal  
6  
7 3 proximity. A sensitivity analysis will be performed on the cohort of participants whose SOFA  
8  
9 4 score at 72 hours is available (i.e., not missing due to early mortality, hospital discharged,  
10  
11 5 etc) using linear regression. An additional sensitivity analysis will be conducted with a SOFA  
12  
13 6 score penalty for early death. Specifically, if a participant expires before 72-hours, a 20%  
14  
15 7 increase from their last available SOFA score will be imputed.  
16  
17  
18  
19  
20  
21  
22

### 23 9 *Analysis of key secondary outcomes*

24  
25 10 Renal failure: a logistic model controlling for site will be used to compare the incidence of  
26  
27 11 renal failure between the intervention and placebo groups. Results will be reported as odds  
28  
29 12 ratios and 95% confidence intervals.  
30  
31  
32  
33

34 14 A sensitivity analysis will be performed with the composite outcome defined as receipt of  
35  
36 15 renal replacement therapy or death while meeting other elements of KDIGO 3 acute renal  
37  
38 16 failure criteria during the index ICU stay using the method described above.  
39  
40  
41  
42  
43

44 18 30-day mortality: Kaplan-Meier log-rank test and Cox proportional hazards model  
45  
46 19 controlling for site will be used to compare the treatment groups in terms of survival. The  
47  
48 20 outcome variable is 30-day mortality and the predictor is the allocated treatment. If the  
49  
50 21 proportional hazards assumption is not met, a logistic regression controlling for site will be  
51  
52 22 performed to obtain odds ratios with 95% confidence intervals.  
53  
54  
55  
56  
57  
58

### 59 24 *Analysis of additional secondary outcomes*

60

1  
2  
3 1 The following outcomes will be summarized using mean (SD) or median (IQR) and linear  
4  
5 2 regression controlling for site will be performed to assess the differences between  
6  
7  
8 3 treatment groups.

- 9  
10 4 ● Absolute change in individual components of the SOFA score from enrollment to 72  
11  
12 hours  
13  
14 5  
15 6 ● Number of ICU-free days in the first 28 days following enrollment  
16  
17  
18 7 ● Length of hospital stay during index admission  
19  
20 8 ● Number of days free of mechanical ventilation during the first 7 days after enrollment  
21  
22  
23 9 ● Number of days free of hemodynamic shock during the first 7 days after enrollment  
24

25  
26  
27  
28  
29  
30  
31  
32  
33  
34  
35  
36  
37  
38  
39  
40  
41  
42  
43  
44  
45  
46  
47  
48  
49  
50  
51  
52  
53  
54  
55  
56  
57  
58  
59  
60

10  
11 The following outcomes will be summarized using frequencies and percentages and logistic  
12 regression will be performed to assess the differences between treatment groups.

- 13 ● Survival to ICU discharge and survival to hospital discharge  
14 ● Delirium, as measured by the CAM-ICU, on day 3 of the patient's ICU stay

15

#### 16 *Analysis of adverse events*

17 Rates of serious expected and unexpected adverse events will be reported by group  
18 assignment. Proportions of patients with adverse events will be compared between the  
19 treatment groups using Fisher's exact test.

20

#### 21 *Analysis of subgroups*

22 The analysis will include the following pre-defined subgroup analyses for the primary and  
23 key secondary outcomes:

- 1  
2  
3 1 • Grouped by high/low initial severity of illness. High and low levels will be defined by  
4  
5 2 a baseline SOFA score above or below the study median.  
6  
7  
8 3 • Grouped by high/low baseline serum lactate level. High and low levels will be  
9  
10 4 defined by a cut-off at a serum lactate  $\geq 3$ mmol/L. This level was chosen to reflect the  
11  
12 5 population of patients enrolled in our prior pilot randomized trial of thiamine vs.  
13  
14 6 placebo in septic shock.<sup>5</sup>  
15  
16  
17  
18 7 • Grouped by investigator prediction of survival at 30-days. The enrolling provider was  
19  
20 8 asked at the time of enrollment whether they thought it was likely, unclear, or  
21  
22 9 unlikely that the patient would be alive at 30-days.  
23  
24  
25 10 • Grouped by timing of enrollment with respect to vasopressor start time. Timing will  
26  
27 11 be defined by a cut-off of 12-hours. This level was chosen based on a review of the  
28  
29 12 median time to enrollment from the data collected to date.  
30  
31  
32

33 13 The trial is not powered to detect subgroup differences and these will be considered  
34  
35 14 exploratory and hypothesis generating.  
36  
37  
38  
39 15

40  
41 16 Blood samples will be collected for the measurement of baseline and subsequent levels of  
42  
43 17 thiamine, ascorbic acid, and cortisol. Exploratory analyses based on this testing will not be  
44  
45 18 presented in the primary trial manuscript, but will be described in follow-up manuscripts.  
46  
47  
48  
49 19

#### 50 20 *Missing data*

51  
52  
53 21 If missing data for any key variable (i.e. those used in the primary outcome analysis) are >  
54  
55 22 15%, multiple imputation with chained equations will be performed.  
56  
57  
58  
59 23  
60

## 1 Trial progress

2 This manuscript describes the SAP for the ACTS trial. The SAP is published prior to  
3 unblinding of the study and provides transparency in decisions with respect to statistical  
4 analysis. The ACTS trial has now enrolled more than 75% of its intended with recruitment  
5 expected to continue through October 2019. As such, 30-day follow-up will be complete for  
6 all patients by the end of November 2019. At the time of this submission, treatment  
7 allocations remain blinded.

## 8

### 9 **Ethics and Dissemination:**

10 The study protocol was approved by the Beth Israel Deaconess Medical Center Committee  
11 on Clinical Investigation (protocol 2017P-000436). The Institutional Review Board at each  
12 participating site also approved the study protocol. The trial was registered on [clinicaltrials.gov](http://clinicaltrials.gov)  
13 (NCT03389555) prior to the enrollment of the first patient. The Food and Drug  
14 Administration (FDA) approved an Investigational New Drug (IND) application (IND 136882).  
15 Study progress and safety will be monitored by an independent DSMB as described above.  
16 Informed, written consent will be obtained prior to enrollment from all participants or their  
17 legally authorized representatives by trained investigators. A sample informed consent form  
18 is included in the supplementary materials. Patients and their legally authorized  
19 representatives will be made aware that participation is strictly voluntary and that consent  
20 can be withdrawn at any time.

21

22 Results of this study will be presented at one or more major scientific conferences and will  
23 be published in a peer-reviewed scientific journal. Patient level data will be available to the

- 1
- 2
- 3 1 ACTS trial investigator team and to other academic investigators upon request as
- 4
- 5
- 6 2 adjudicated by the ACTS Steering Committee.
- 7
- 8
- 9
- 10
- 11
- 12
- 13
- 14
- 15
- 16
- 17
- 18
- 19
- 20
- 21
- 22
- 23
- 24
- 25
- 26
- 27
- 28
- 29
- 30
- 31
- 32
- 33
- 34
- 35
- 36
- 37
- 38
- 39
- 40
- 41
- 42
- 43
- 44
- 45
- 46
- 47
- 48
- 49
- 50
- 51
- 52
- 53
- 54
- 55
- 56
- 57
- 58
- 59
- 60

For peer review only

## References

1. Moskowitz A, Andersen LW, Huang DT, et al. Ascorbic acid, corticosteroids, and thiamine in sepsis: a review of the biologic rationale and the present state of clinical evaluation. *Critical Care* 2018; 22(1).
2. Lelubre C, Vincent JL. Mechanisms and treatment of organ failure in sepsis. *Nat Rev Nephrol* 2018;14(7):417-427
3. Brealey D, Brand M, Hargreaves I, et al. Association between mitochondrial dysfunction and severity and outcome of septic shock. *Lancet* 2002;360(9328):219-23
4. Marik PE, Khangoora V, Rivera R, et al. Hydrocortisone, Vitamin C, and Thiamine for the Treatment of Severe Sepsis and Septic Shock: A Retrospective Before-After Study. *Chest* 2017;151(6):1229-1238
5. Donnino MW, Andersen LW, Chase M, et al. Randomized, Double-Blind, Placebo-Controlled Trial of Thiamine as a Metabolic Resuscitator in Septic Shock: A Pilot Study. *Crit Care Med* 2016;44(2):360-7
6. Fowler AA 3rd, Truitt JD, Hite RD, et al. Effect of Vitamin C Infusion on Organ Failure and Biomarkers of Inflammation and Vascular Injury in Patients With Sepsis and Severe Acute Respiratory Failure: The CITRIS-ALI Randomized Clinical Trial. *JAMA* 2019; 322(13):1261-1270
7. ClinicalTrials.gov. <https://clinicaltrials.gov/ct2/show/NCT03389555>. Accessed 09 September 2019
8. Venkatesh B, Finfer S, Cohen J, et al. Adjunctive Glucocorticoid Therapy in Patients with Septic Shock. *N Engl J Med* 2018; 378(9):797-808
9. Annane D, Renault A, Brun-Buisson C, et al. Hydrocortisone plus Fludrocortisone for Adults with Septic Shock. *N Engl J Med*. 2018; 378(9):809-818
10. Pandharipande PP, Shintani AK, Hagerman HE, et al. Derivation and validation of Spo<sub>2</sub>/Fio<sub>2</sub> ratio to impute for Pao<sub>2</sub>/Fio<sub>2</sub> ratio in the respiratory component of the Sequential Organ Failure Assessment score. *Critical care medicine* 2009; 37(4): 1317-132.
11. Ely EW, Inouye SK, Bernard GR, et al. Delirium in mechanically ventilated patients: validity and reliability of the confusion assessment method for the intensive care unit (CAM-ICU). *Jama* 2001; 286(21): 2703-2710.
12. Marik PE, Khangoora V, Rivera R, et al. Hydrocortisone, vitamin c, and thiamine for the treatment of severe sepsis and septic shock: a retrospective before-after study. *Chest* 2017; 151(6): 1229-1238.
13. Rhee C, Dantes R, Epstein L, et al. Incidence and trends of sepsis in US hospitals using clinical vs claims data, 2009-2014. *Jama* 2017; 318(13): 1241-1249.
14. Fergusson D, Aaron SD, Guyatt G, et al. Post-randomisation exclusions: the intention to treat principle and excluding patients from analysis. *BMJ* 2002; 325(7365): 652-654.
15. Kahan BC, Morris TP. Improper analysis of trials randomised using stratified blocks or minimisation. *Stat Med* 2012 Feb 20; 31(4): 328-40.
16. Boutron I, Moher D, Altman DG, et al. Extending the CONSORT statement to randomized trials of nonpharmacologic treatment: explanation and elaboration. *Ann Intern Med* 2008; 148: 295-309.



1  
2  
3  
4  
5  
6  
7  
8  
9  
10  
11  
12  
13  
14  
15  
16  
17  
18  
19  
20  
21  
22  
23  
24  
25  
26  
27  
28  
29  
30  
31  
32  
33  
34  
35  
36  
37  
38  
39  
40  
41  
42  
43  
44  
45  
46  
47  
48  
49  
50  
51  
52  
53  
54  
55  
56  
57  
58  
59  
60

1 **Tables**

2 Table 1: Modified Sequential Organ Failure Assessment Score

3 Table 2: Definitions of secondary outcomes

4 Table 3: Definitions of adverse events and safety outcomes

5 Table 4: Baseline characteristics of patients stratified by treatment group

For peer review only



Table 1: Modified Sequential organ Failure Assessment Score

| Points | SaO <sub>2</sub> */FiO <sub>2</sub> §                                   | Blood Pressure                                                      | GCS   | Bilirubin (mg/dL) | Creatinine (mg/dL)                             | Platelets (x10 <sup>3</sup> µL) |
|--------|-------------------------------------------------------------------------|---------------------------------------------------------------------|-------|-------------------|------------------------------------------------|---------------------------------|
| 0      | >399                                                                    | MAP# ≥ 70 mmHg                                                      | 15    | <1.2              | <1.2                                           | ≥150                            |
| 1      | 316-399                                                                 | MAP < 70 mmHg                                                       | 13–14 | 1.2–1.9           | 1.2 – 1.9                                      | <150                            |
| 2      | 236-315                                                                 | dopamine ≤ 5 µg/kg/min or dobutamine (any dose)                     | 10–12 | 2–5.9             | 2.0 – 3.4                                      | <100                            |
| 3      | 151-235 (and receiving invasive or non-invasive mechanical ventilation) | dopamine > 5 µg/kg/min, epinephrine/norepinephrine ≤ 0.1 µg/kg/min  | 6–9   | 6–11.9            | 3.5 – 4.9<br>Or<br>UOP <sup>†</sup> <500ml/day | <50                             |
| 4      | <151(and receiving invasive or non-invasive mechanical ventilation)     | dopamine > 15 µg/kg/min, epinephrine/norepinephrine > 0.1 µg/kg/min | <6    | ≥12               | ≥5.0<br>UOP <sup>†</sup> <200ml/day            | <20                             |

\*SaO<sub>2</sub>=Oxygen saturation (%); § = Fraction of inspired oxygen (%); || = Glasgow Coma Scale; # = Mean arterial pressure; † = Urine Output

Table 2: Definitions of secondary outcomes

| Variable                                               | DESCRIPTION                                                                                                                                                                                                                                                                                                                                                                                                                                                                                                                                                                                                                                                                                                       |
|--------------------------------------------------------|-------------------------------------------------------------------------------------------------------------------------------------------------------------------------------------------------------------------------------------------------------------------------------------------------------------------------------------------------------------------------------------------------------------------------------------------------------------------------------------------------------------------------------------------------------------------------------------------------------------------------------------------------------------------------------------------------------------------|
| KDIGO Stage 3 Renal Injury During Index ICU Stay       | <p>Acute renal failure any time during the index ICU stay. Defined as KDIGO stage 3 based on creatinine or urine output:</p> <p>Creatinine criteria: Increase in serum creatinine to more than 300% (&gt; 3-fold) from baseline (or serum creatinine of more than or equal to 4.0 mg/dl with an acute increase of at least 0.5 mg/dl)</p> <p>Urine output criteria: Less than 0.3 ml/kg per hour for 24 hours or anuria for 12 hours or new renal replacement therapy</p>                                                                                                                                                                                                                                         |
| Number of ICU-Free Days in the first 28 Days           | <p>Number of days during the first 28 days following study enrollment when the patient was not in the ICU or dead (all days after hospital discharge are considered ICU free).</p> <p>Note: patient would be considered “in the ICU” if they were a patient there for ≥6 hours in the course of a day or if they died prior to 28 days. For example, a patient who died while still in the ICU on day 5 would have 0 ICU-free days. A patient who was discharged from the ICU on day 3 and readmitted on day 7 and discharged again on day 21 would have 10 ICU free days (days 4-6 and 22-28). A patient who was discharged from the ICU on day 3 and did not return to the ICU would have 25 ICU-free days.</p> |
| Survived to ICU discharge                              | Survived to ICU discharge                                                                                                                                                                                                                                                                                                                                                                                                                                                                                                                                                                                                                                                                                         |
| Survived to Hospital discharge                         | Survived to hospital discharge                                                                                                                                                                                                                                                                                                                                                                                                                                                                                                                                                                                                                                                                                    |
| Hospital Disposition                                   | Hospital disposition in survivors. Extended care facilities include home with service, rehabilitation center, nursing home, skilled nursing facility/extended care 6, hospice (home or inpatient), and transferred to another acute care facility                                                                                                                                                                                                                                                                                                                                                                                                                                                                 |
| Shock free days                                        | Over the first 7 calendar days after enrollment, number of days in which the patient received <6 hours of any vasopressor agent.                                                                                                                                                                                                                                                                                                                                                                                                                                                                                                                                                                                  |
| Invasive Ventilation Free Days                         | Over the first 7 calendar days after enrollment, number of days in which the patient received <6 hours invasive mechanical ventilation.                                                                                                                                                                                                                                                                                                                                                                                                                                                                                                                                                                           |
| Delirium 72 Hour of ICU Stay (as measured via CAM-ICU) | Delirium on the 3rd day (at approximately 72 hours) after the first study drug dose. Delirium is defined by the Confusion Assessment Method (CAM)-ICU or by the regular CAM if the patient is on the hospital ward.                                                                                                                                                                                                                                                                                                                                                                                                                                                                                               |

Table 3: Definitions of adverse events and safety outcomes

The following definitions will be used:

**Adverse event (AE):** any untoward medical occurrence in a participant to whom a medicinal product is administered and which does not necessarily have a causal relationship with this treatment

**Serious adverse event (SAE):** any untoward medical occurrence that at any dose requires inpatient hospitalization or prolongation of existing hospitalization, results in persistent or significant disability or incapacity, results in a congenital anomaly or birth defect, is life-threatening, or results in death

**Suspected unexpected serious adverse event (SUSAR):** a serious adverse reaction, the nature, severity or outcome of which is not consistent with the reference safety information

| LABEL                  | DESCRIPTION                                                                                                                                                                                                                                                                                                                                                                                                                                                                                                                                                                                                                                                                                                                                                                                                                                                                                      |
|------------------------|--------------------------------------------------------------------------------------------------------------------------------------------------------------------------------------------------------------------------------------------------------------------------------------------------------------------------------------------------------------------------------------------------------------------------------------------------------------------------------------------------------------------------------------------------------------------------------------------------------------------------------------------------------------------------------------------------------------------------------------------------------------------------------------------------------------------------------------------------------------------------------------------------|
| Serious Adverse Events | <p><b>Hyperglycemia:</b> Blood glucose &gt;300mg/dL or new insulin infusion occurring in the first 120-hours after enrollment</p> <p><b>Hyponatremia:</b> Serum sodium (&gt;150 mmol/L) occurring in the first 120-hours after enrollment</p> <p><b>New Infection:</b> As determined by the site principal investigator at each site. Should be a new organism or site of infection and believed to be unrelated to the initial presenting infectious source. Many will have the initiation of new antibiotics or a change in antibiotics.</p> <p><b>Serious allergic reaction:</b> Anaphylaxis or other allergic reaction requiring systemic corticosteroids.</p> <p><b>Renal calculus:</b> Development of a renal calculus between enrollment and 30-day follow-up.</p> <p><b>Others/Unexpected:</b> Any other serious adverse event possibly related to study drug or study participation</p> |
| Related to Study?      | <p><b>Definitely related:</b> no other potential cause of SAE is identified. Investigator certain or near certain the hyperglycemia is related to study drug</p> <p><b>Possibly related:</b> other potential causes of SAE exist. There is at least a 50% chance the hyperglycemia is related to the study drug</p> <p><b>Unlikely related:</b> a clear alternative reason for SAE exists. The investigators believe that there is a &lt;50% chance the SAE is related to study drug</p>                                                                                                                                                                                                                                                                                                                                                                                                         |

1  
2  
3  
4  
5  
6  
7  
8  
9  
10  
11  
12  
13  
14  
15  
16  
17  
18  
19  
20  
21  
22  
23  
24  
25  
26  
27  
28  
29  
30  
31  
32  
33  
34  
35  
36  
37  
38  
39  
40  
41  
42  
43  
44  
45  
46  
47  
48  
49  
50  
51  
52  
53  
54  
55  
56  
57  
58  
59  
60

|                                              |                                                                                                                           |
|----------------------------------------------|---------------------------------------------------------------------------------------------------------------------------|
| Other serious adverse event severity grading | <u>Grade I:</u> Mild; asymptomatic or mild symptoms; clinical or diagnostic observations only; intervention not indicated |
|                                              | <u>Grade II:</u> Moderate; minimal, local or noninvasive intervention indicated                                           |
|                                              | <u>Grade III:</u> Severe or Medically Significant BUT not Immediately Life-threatening                                    |
|                                              | <u>Grade IV:</u> Life-threatening Consequences; urgent intervention indicated                                             |
|                                              | <u>Grade V:</u> Death Related to Adverse Event                                                                            |

For peer review only

Table 4: Baseline characteristics of patients stratified by treatment group

| Characteristics                           | Overall<br>(N = ) | Ascorbic acid,<br>Hydrocortisone,<br>and Thiamine<br>(N = ) | Placebo<br>(N = ) |
|-------------------------------------------|-------------------|-------------------------------------------------------------|-------------------|
| <i>Demographics</i>                       |                   |                                                             |                   |
| Age, yr                                   |                   |                                                             |                   |
| Body mass index, kg/m <sup>2</sup>        |                   |                                                             |                   |
| Female, n (%)                             |                   |                                                             |                   |
| Race, n (%)                               |                   |                                                             |                   |
| African-American                          |                   |                                                             |                   |
| White                                     |                   |                                                             |                   |
| Other                                     |                   |                                                             |                   |
| Past medical history, n (%)               |                   |                                                             |                   |
| None of the below                         |                   |                                                             |                   |
| Coronary artery disease                   |                   |                                                             |                   |
| Cancer                                    |                   |                                                             |                   |
| Congestive heart failure                  |                   |                                                             |                   |
| Chronic obstructive pulmonary disease     |                   |                                                             |                   |
| Dementia/Alzheimer's                      |                   |                                                             |                   |
| Diabetes                                  |                   |                                                             |                   |
| Alcohol use disorder                      |                   |                                                             |                   |
| HIV/AIDS                                  |                   |                                                             |                   |
| Liver disease                             |                   |                                                             |                   |
| Renal disease                             |                   |                                                             |                   |
| Stroke/Transient ischemic attack          |                   |                                                             |                   |
| History of tobacco use                    |                   |                                                             |                   |
| Organ or Bone Marrow Transplant           |                   |                                                             |                   |
| Chronic renal disease stage, n (%)        |                   |                                                             |                   |
| Stage 2                                   |                   |                                                             |                   |
| Stage 3a                                  |                   |                                                             |                   |
| <i>Septic Shock Characteristics</i>       |                   |                                                             |                   |
| Source of sepsis, n (%)                   |                   |                                                             |                   |
| Pneumonia                                 |                   |                                                             |                   |
| Urinary Tract Infection                   |                   |                                                             |                   |
| Intra-Abdominal Infection                 |                   |                                                             |                   |
| Skin or Soft Tissue Infection             |                   |                                                             |                   |
| Vascular Catheter-related Infection       |                   |                                                             |                   |
| Central Nervous System Infection          |                   |                                                             |                   |
| Endocarditis                              |                   |                                                             |                   |
| Infection of Unknown Source               |                   |                                                             |                   |
| Other                                     |                   |                                                             |                   |
| Vasopressors at Time of Study Drug, n (%) |                   |                                                             |                   |
| Norepinephrine                            |                   |                                                             |                   |
| Epinephrine                               |                   |                                                             |                   |
| Phenylephrine                             |                   |                                                             |                   |
| Vasopressin                               |                   |                                                             |                   |

|    |                                                    |  |  |  |
|----|----------------------------------------------------|--|--|--|
| 1  |                                                    |  |  |  |
| 2  |                                                    |  |  |  |
| 3  | Dopamine                                           |  |  |  |
| 4  | Dobutamine                                         |  |  |  |
| 5  | Angiotensin                                        |  |  |  |
| 6  | Milrinone                                          |  |  |  |
| 7  | Midodrine                                          |  |  |  |
| 8  |                                                    |  |  |  |
| 9  | Mechanical ventilation, n (%)                      |  |  |  |
| 10 | Volume of IV fluids <sup>a</sup> , ml              |  |  |  |
| 11 | <i>Baseline vital signs</i>                        |  |  |  |
| 12 |                                                    |  |  |  |
| 13 | Temperature, Celsius                               |  |  |  |
| 14 | Heart rate, beats/minute                           |  |  |  |
| 15 | Systolic blood pressure, mmHg                      |  |  |  |
| 16 | Diastolic blood pressure, mmHg                     |  |  |  |
| 17 | Respiratory rate, inspirations/minute              |  |  |  |
| 18 | Lactate, mmol/L                                    |  |  |  |
| 19 | WBC x10 <sup>9</sup>                               |  |  |  |
| 20 | Creatinine, mg/dL                                  |  |  |  |
| 21 |                                                    |  |  |  |
| 22 | <i>ICU physician prediction<sup>b</sup></i>        |  |  |  |
| 23 |                                                    |  |  |  |
| 24 | Predicted survival at 30 days <sup>b</sup> , n (%) |  |  |  |
| 25 | Very likely                                        |  |  |  |
| 26 | Uncertain                                          |  |  |  |
| 27 | Very unlikely                                      |  |  |  |
| 28 |                                                    |  |  |  |
| 29 | <i>SOFA score</i>                                  |  |  |  |
| 30 | Baseline SOFA score                                |  |  |  |

- 31 a. Volume of IV fluids received in the 12-hours preceding enrollment
- 32 b. At time of enrollment, the physician enrolling the patient is asked to predict 30-day survival.
- 33
- 34
- 35
- 36
- 37
- 38
- 39
- 40
- 41
- 42
- 43
- 44
- 45
- 46
- 47
- 48
- 49
- 50
- 51
- 52
- 53
- 54
- 55
- 56
- 57
- 58
- 59
- 60

1  
2  
3  
4  
5  
6  
7  
8  
9  
10  
11  
12  
13  
14  
15  
16  
17  
18  
19  
20  
21  
22  
23  
24  
25  
26  
27  
28  
29  
30  
31  
32  
33  
34  
35  
36  
37  
38  
39  
40  
41  
42  
43  
44  
45  
46  
47  
48  
49  
50  
51  
52  
53  
54  
55  
56  
57  
58  
59  
60

For peer review only

\*\*FOR CCI USE ONLY\*\*

**Approved by the Beth Israel Deaconess Medical Center  
Committee on Clinical Investigations:**
**Consent Approval Date:** 9/10/18
**Protocol Number:** 2017P-000436
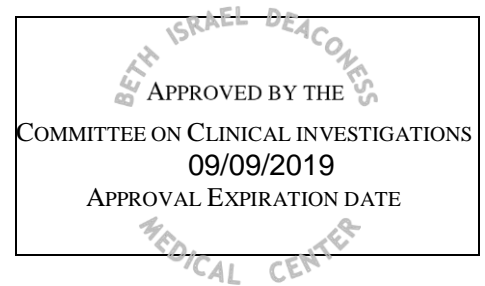

## INFORMED CONSENT FORM TO TAKE PART IN A RESEARCH STUDY

|                                                                                                 |
|-------------------------------------------------------------------------------------------------|
| <b>SUBJECT'S NAME:</b>                                                                          |
| <b>TITLE OF RESEARCH PROTOCOL: Vitamin C, Steroids, and Thiamine in Sepsis and Septic Shock</b> |
| <b>PRINCIPAL INVESTIGATOR: Michael Donnino, MD (BIDMC)</b>                                      |
| <b>SITE PRINCIPAL INVESTIGATOR: PETER HOU MD (BWH)</b>                                          |
| <b>PROTOCOL NUMBER: 2017P-000436</b>                                                            |

### INTRODUCTION:

- This is a research study;
- Your participation is voluntary;
- A research study includes only people who choose to take part;
- You may or may not benefit from participating in the study. However, your participation may help others in the future as a result of knowledge gained from the research;
- You may leave the study at any time;
- If you choose not to take part, or if you leave the study, your decision will in no way harm your relationship with any member of the research team or any other individuals at Beth Israel Deaconess Medical Center (BIDMC) or Brigham and Women's Hospital (BWH).

Please read this consent form carefully and ask the investigators or study staff to explain any words or information that you do not clearly understand. Once you read this consent form and understand what your participation in this study will involve, you will be asked to sign this form if you wish to take part. You will be given a signed copy of the form to keep for your records. Please keep your copy for your records. It has information, including important names and telephone numbers, for future reference.

### DISCLOSURE OF SPECIAL INTERESTS OF BIDMC [Beth Israel Deaconess Medical Center], BWH [Brigham and Women's Hospital] AND INVESTIGATORS

This study is being conducted by Dr. Michael Donnino and Dr. Peter Hou. This study is funded by the Good Ventures Foundation (Open Philanthropy Project). The funding agency in this study, Good Ventures Foundation (Open Philanthropy Project), is paying Beth Israel Deaconess Medical Center to perform this research. Beth Israel Deaconess Medical Center, Brigham and Women's Hospital, Dr. Donnino, and Dr. Hou have no additional interests in this research project.

### WHOM TO CONTACT IF YOU HAVE QUESTIONS OR PROBLEMS

If you are signing this consent at BIDMC and have any questions, concerns or complaints about this



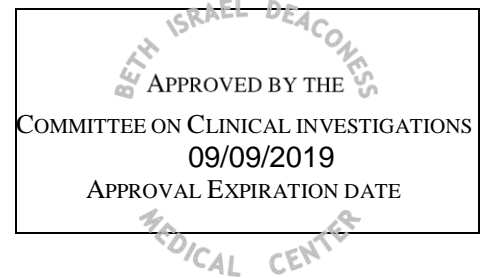

|                                                                                          |
|------------------------------------------------------------------------------------------|
| SUBJECT'S NAME:                                                                          |
| TITLE OF RESEARCH PROTOCOL: VITAMIN C, STEROIDS, AND THIAMINE IN SEPSIS AND SEPTIC SHOCK |
| PRINCIPAL INVESTIGATOR'S NAME: MICHAEL DONNINO, MD (BIDMC) AND PETER HOU, MD (BWH)       |
| PROTOCOL #: 2017P-000436                                                                 |

research or experience any problems, you should contact Dr. Donnino at [617] 754-2341. You can also call the ED Research Team at [617] 754-2882 with questions about this research study.

If you are signing this consent at Brigham and Women's Hospital, please contact Peter Hou, MD at (617) 732-6062, Monday – Friday 9 am-5 pm or he can be reached 24/7 via the hospital page operator by dialing (617) 732-5500 and ask to have him paged.

## PURPOSE

We are conducting this study to see the effects of Vitamin C, Hydrocortisone and Thiamine administered together on organ injury in people with severe infections. We want to determine if these drugs administered together will be helpful for people with severe infections.

Vitamin C and Vitamin B1 (also called Thiamine) are vitamins which are essential for the function of the cells in your body. Without adequate Vitamin C and Thiamine, certain aspects of energy production would not take place properly. Hydrocortisone is a corticosteroid (a naturally occurring compound in your body) that is commonly used for the treatment of patients with low blood pressure caused by severe infections.

Recent studies have shown that patients with serious infections often have low levels of Thiamine and Vitamin C in their body. In addition, there is some evidence that giving Thiamine to animals with septic shock improves energy production, even in those who are not deficient. Further there is evidence that Vitamin C administered together with Hydrocortisone and Thiamine may improve survival in patients with severe infection.

## STUDY PARTICIPANTS

You have been asked to be in the study because you have a serious infection, called Sepsis. Sepsis is a severe infection that causes low blood pressure and critical illness. This is a very serious condition that even with treatment can lead to organ dysfunction and even death.

Approximately 60 people will take part in this study at Beth Israel Deaconess Medical Center and 20 will participate at Brigham and Women's Hospital. A total of 200 people will take part in this study at all study sites.

## DESCRIPTION OF STUDY DETAILS

If you agree to be in this study, you will be asked to read and sign this consent form. After you sign the consent form, the following things will happen:

1. **Screening Procedures:** Screening procedures are tests and procedures that will be done to determine if you are eligible to take part in the research study. For this research study, the

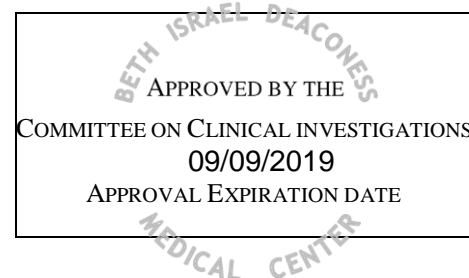

|                                                                                          |
|------------------------------------------------------------------------------------------|
| SUBJECT'S NAME:                                                                          |
| TITLE OF RESEARCH PROTOCOL: VITAMIN C, STEROIDS, AND THIAMINE IN SEPSIS AND SEPTIC SHOCK |
| PRINCIPAL INVESTIGATOR'S NAME: MICHAEL DONNINO, MD (BIDMC) AND PETER HOU, MD (BWH)       |
| PROTOCOL #: 2017P-000436                                                                 |

screening procedure will be a review of your medical record to see if you qualify for the study.

If you are a female aged <45 years, we will ensure that you have had a negative blood or urine pregnancy test performed as part of your care. This will generally be done as part of usual care.

2. Randomization Procedures: You will be randomly assigned (like the flip of a coin) to receive either Vitamin C, Hydrocortisone, and Thiamine or a Placebo. You have a 1 in 2 chance of receiving either the drugs or the placebo. You will not be able to choose the study group to which you will be assigned.

If one treatment arm is found to be less effective than the other while you are taking part in the study, you will be informed and further treatment will be discussed.

Depending upon the group to which you are assigned, you may receive a placebo instead of the study drugs. A placebo is an inactive substance that looks like the study drug, but a placebo contains no active medication. Placebos are used to help determine if the results of the study are truly from the study drug. The placebo used in this study will be an intravenous (IV) infusion of 0.9% Sodium Chloride. This is a solution of sodium chloride in water (salt water). You will not know whether you will be receiving the study drug or the placebo. However, this information can be learned in case of an emergency.

3. Research Procedures: Your chart will be reviewed to assure that you are appropriate for inclusion in the study. If you qualify to take part in this research study and you choose to participate you will undergo these research procedures:

- A blood draw right after you sign the consent to examine chemicals in your blood which tell us something about how it is responding to an infection. We will draw no more than 30 milliliters/2 tablespoons of blood (depending on how much blood is available from clinical blood draws).
- You will be assigned to one of the following groups:
  - **Vitamin C, Hydrocortisone, and Thiamine group:** If you are assigned to the Vitamin C, Hydrocortisone, and Thiamine group you will receive 4 daily doses of 1.5 grams of Vitamin C, 100 milligrams of Thiamine and 50 milligrams of Hydrocortisone. Vitamin C and Thiamine will be administered intravenously (i.e: into your veins) every 6 hours for a total of 4 days or until discharge from the ICU. Similarly, Hydrocortisone will be administered intravenously for up to 4 days or until you are discharged from the ICU (whatever happens first).

|                                                                                          |
|------------------------------------------------------------------------------------------|
| SUBJECT'S NAME:                                                                          |
| TITLE OF RESEARCH PROTOCOL: VITAMIN C, STEROIDS, AND THIAMINE IN SEPSIS AND SEPTIC SHOCK |
| PRINCIPAL INVESTIGATOR'S NAME: MICHAEL DONNINO, MD (BIDMC) AND PETER HOU, MD (BWH)       |
| PROTOCOL #: 2017P-000436                                                                 |

|                                                                                                                                                                                          |
|------------------------------------------------------------------------------------------------------------------------------------------------------------------------------------------|
| 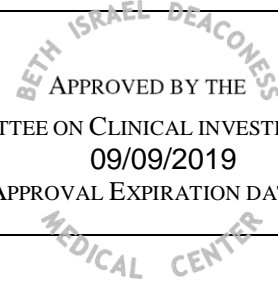<br>APPROVED BY THE<br>COMMITTEE ON CLINICAL INVESTIGATIONS<br>09/09/2019<br>APPROVAL EXPIRATION DATE |
|------------------------------------------------------------------------------------------------------------------------------------------------------------------------------------------|

- **Placebo group:** If you are assigned to the placebo group you will receive 4 daily doses of 0.9% Sodium Chloride for up to 4 days or until discharge from the ICU (whatever happens first).
- Blood samples will be drawn at enrollment (0 hours), 24 hours, 72 hours, and 120 hours for a maximum total of 240 milliliters (no more than 16 tablespoons total). Portions of your blood collected for research will be used to:
  - Clinical laboratory tests, analysis of cells (how your organs are working), serum, and plasma (parts of your blood). Some of these exams, tests may be done as part of regular care; if so, they may not need to be repeated; this decision will be up to your study doctor.
  - Freeze and store any leftover blood for possible analysis in the future of proteins in your blood called biomarkers that increase and decrease when your body is under stress. This extra blood will be stored at BIDMC and may be kept for up to 10 years. Access to these samples will be limited to the investigator and collaborators. If at any point you choose to withdraw your consent, you may contact Dr. Donnino (BIDMC) or Dr. Hou (BWH) and these samples will be disposed of and will not be used for future research. Genetic testing will not be performed.
- Urine will be collected at enrollment (0 hours), 24 hours, and 72 hours for a maximum total of 30 milliliters. We will study the characteristics of your urine to better understand how your kidneys are functioning. Additional urine will be frozen and stored for possible analysis in the future of proteins in your urine called biomarkers that increase and decrease when your body is under stress. This urine may be stored for up to 10 years and access to these samples will be limited to the investigator and collaborators. If at any point you choose to withdraw your consent, you may contact Dr. Donnino (BIDMC) or Dr. Hou (BWH) and these samples will be disposed of and will not be used for future research. Genetic testing will not be performed.
- Assessment of organ support, which includes, for example, medications to maintain blood pressure, will be performed everyday while you are in the hospital.
- We will also perform a more thorough review of your chart to see how you are doing while you are in the hospital. Information regarding your progress and treatments will be reviewed by the research team. We will collect and record vital signs, laboratory results, treatments you may have received and any other tests done as part of your care. If you were not in this study, we would not be reviewing your medical record.

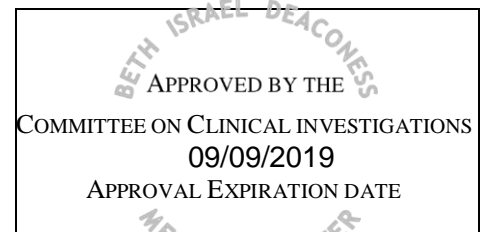

|                                                                                          |
|------------------------------------------------------------------------------------------|
| SUBJECT'S NAME:                                                                          |
| TITLE OF RESEARCH PROTOCOL: VITAMIN C, STEROIDS, AND THIAMINE IN SEPSIS AND SEPTIC SHOCK |
| PRINCIPAL INVESTIGATOR'S NAME: MICHAEL DONNINO, MD (BIDMC) AND PETER HOU, MD (BWH)       |
| PROTOCOL #: 2017P-000436                                                                 |

- If you have been discharged from the hospital, you will receive a telephone call at 30-days after enrollment and 90-days after enrollment to see how you are doing after your hospitalization. If we are unable to reach you after two attempts, you may receive a follow-up letter.

4. Monitoring/Follow-Up Procedures. Procedures performed to evaluate the effectiveness and safety of the research procedures are called “monitoring” or “follow-up” procedures. For this research study, the monitoring/follow-up procedures include:

- At each of the blood draws (0 hours, 24 hours, 72 hours, 120 hours) we will follow along in your chart and record lab results from your routine care. When you are discharged, we will record information about your length of stay and signs of organ failure during your hospital stay.
- If you have been discharged from the hospital, you will receive a telephone call at 30-days after enrollment and 90-days after enrollment to see how you are doing after your hospitalization. If we are unable to reach you after two attempts, you may receive a follow-up letter.

**For BWH site:** Blood samples and data, with your name and identifying information removed by study staff will be sent to BIDMC analysis center. The BIDMC analysis center will not receive any protected health information.

## RISKS AND DISCOMFORTS

As a result of your participation in this study, you are at risk for side effects listed in this section. You should discuss these with the investigator and with your regular doctor if you choose.

### Blood Draw Risk:

The risks associated with venipuncture (for blood draws) include momentary pain during needle insertion and bruising at the site of needle insertion. Infection, excess bleeding, clotting, and fainting also are possible, though unlikely. However, it is very likely that you will have an intravenous line from which we may draw, and so the blood draw will be painless. There is a very small risk that air or microorganisms may be introduced in your blood stream, but many steps will be taken to keep this risk at an absolute minimum.

### Thiamine Risk:

The only known side effect from Thiamine is the potential for an allergic reaction. Allergic reactions (anaphylaxis) from Thiamine, in general, are very rare. The chance of a serious allergic reaction from Thiamine is approximately 1 in 250,000. There may be a risk of feeling burning at the site of the administration of the study drug.

1  
 2  
 3 SUBJECT'S NAME:

 4 TITLE OF RESEARCH PROTOCOL: VITAMIN C, STEROIDS, AND THIAMINE IN  
 5 SEPSIS AND SEPTIC SHOCK

 6 PRINCIPAL INVESTIGATOR'S NAME: MICHAEL DONNINO, MD (BIDMC)  
 7 AND PETER HOU, MD (BWH)

 8 PROTOCOL #: 2017P-000436  
 9  
 10  
 11  
 12
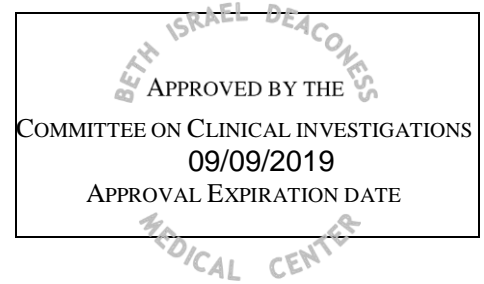
 13 **Vitamin C Risk:**

 14 In high doses Vitamin C can increase the excretion of oxalate (a chemical substance) in your urine,  
 15 which, in some cases, raises the risk of kidney stone formation. To prevent this from happening,  
 16 individuals with a history of kidney stones within the past year will not participate in the study.  
 17 There is also a chance you will feel dizzy and a rare chance of diarrhea and bloating. Allergic  
 18 reactions (anaphylaxis) in general, are very rare.  
 19

 20  
 21 **Hydrocortisone Risk:**

 22 Multiple studies with the same dosages of steroids in severe infections over a short time course  
 23 (similar to this study) have been performed and Hydrocortisone is a standard part of care for many  
 24 patients with severe infections. Hydrocortisone may increase your risk of additional infections, higher  
 25 blood sugars, higher levels of sodium, bleeding of the digestive tract and muscle weakness  
 26 (although these effects have not been clearly seen in patients receiving Hydrocortisone for sepsis).  
 27 In pregnancy, Hydrocortisone may increase the risk of cleft palate and there are concerns about the  
 28 effects of Hydrocortisone on fetal growth and the adrenal gland function. If you are pregnant, you  
 29 should not participate in this study.  
 30

 31  
 32 **LOSS OF CONFIDENTIALITY**

 33 There is the potential for loss of confidentiality by participating in this study. Every effort will be  
 34 made to protect the confidentiality of your identifiable information.  
 35

 36  
 37  
 38 **CONFIDENTIALITY**

 39 Information learned from your participation in this study and from your medical record may be  
 40 reviewed and photocopied by the Food and Drug Administration (FDA) and/or other federal and  
 41 state regulatory agencies, accreditation agencies, the Committee on Clinical Investigations, the  
 42 Human Subjects Protection Office and others involved in research administration of the Beth Israel  
 43 Deaconess Medical Center and Brigham and Women's Hospital with protection of confidentiality so  
 44 far as permitted by applicable law. Information resulting from this study and from your medical  
 45 record may be used for research purposes and may be published; however, you will not be identified  
 46 by name in such publications.  
 47  
 48  
 49

 50  
 51 **MEDICAL RECORD**

 52 A copy of this consent form and information collected during this research may become part of your  
 53 medical record, if the information is relevant to the care you receive at Beth Israel Deaconess  
 54 Medical Center. Medical records are considered permanent records; therefore, information cannot  
 55 be deleted from the record. Medical records are available to health care professionals at Beth Israel  
 56  
 57

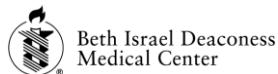1  
2  
3 SUBJECT'S NAME:4 TITLE OF RESEARCH PROTOCOL: VITAMIN C, STEROIDS, AND THIAMINE IN  
5 SEPSIS AND SEPTIC SHOCK6 PRINCIPAL INVESTIGATOR'S NAME: MICHAEL DONNINO, MD (BIDMC)  
7 AND PETER HOU, MD (BWH)8  
9 PROTOCOL #: 2017P-000436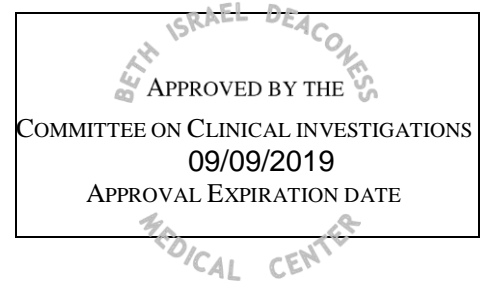

11 Deaconess Medical Center and may be reviewed by staff when carrying out their responsibilities, as  
12 well as by external parties such as health care insurers and others in certain circumstances. If you  
13 are not currently a patient at Beth Israel Deaconess Medical Center and do not have a medical  
14 record at Beth Israel Deaconess Medical Center, one may be created for you for your participation in  
15 this research. You may also be required to register as a patient of Beth Israel Deaconess Medical  
16 Center in order to participate in this research.

## 20 POSSIBLE BENEFITS

21 It is not possible to predict whether you will benefit directly from participation in this study. However,  
22 your participation may help others in the future as a result of knowledge gained from the research.

## 26 OTHER AVAILABLE OPTIONS

28 Taking part in this study is voluntary. If you choose not to participate in this study, you will continue  
29 to receive clinical care from your ICU team as you have been.

31 It is important to note that it is possible to get Thiamine even if you do not take part in the study.  
32 Thiamine and Vitamin C have not been approved by the FDA for treatment of your condition;  
33 however, many doctors in the community commonly prescribe these drugs to treat vitamin  
34 deficiencies. Please be aware that not all doctors may agree to prescribe this drug for you, and that  
35 not all health insurance companies will pay for the drug when it is prescribed by your treating  
36 physician for sepsis (although will be provided free of charge to you if given as part of this study).

39 It is important to note that it is possible to get Hydrocortisone even if you do not take part in this  
40 study. Hydrocortisone has been approved by the FDA for treatment of your condition and is already  
41 used in certain clinical scenarios in patients with septic shock.

44 We recommend that you discuss these and other options with the investigator and your regular  
45 doctor so that you can make a well-informed decision about participating in this study.

## 48 IF YOU DECIDE NOT TO TAKE PART IN THE STUDY

49 Participation in this study is voluntary. You have the right to decide not to take part in this study. If  
50 you choose to participate, you have the right to leave the study at any time. Your decision to not  
51 participate will not result in any penalties or loss of benefits to you. The investigators will tell you  
52 about new information that may affect your willingness to stay in this study.

55 If you decide not to participate in the study or decide to leave the study early, your decision will not  
56 affect your relationship with the research team or any other individual at Beth Israel Deaconess

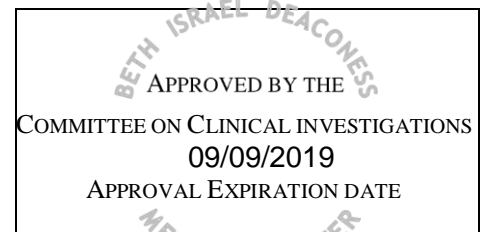
 1  
 2  
 3 SUBJECT'S NAME:

 4 TITLE OF RESEARCH PROTOCOL: VITAMIN C, STEROIDS, AND THIAMINE IN  
 5 SEPSIS AND SEPTIC SHOCK

 6 PRINCIPAL INVESTIGATOR'S NAME: MICHAEL DONNINO, MD (BIDMC)  
 7 AND PETER HOU, MD (BWH)

 8  
 9 PROTOCOL #: 2017P-000436

 10  
 11 Medical Center or Brigham and Women's Hospital.

 12  
 13  
 14 **INVESTIGATORS RIGHT TO STOP THE STUDY**

 15 The investigators have the right to end your participation in this study if they determine that you no  
 16 longer qualify to take part, or if it would be dangerous for you to continue, or if you do not follow  
 17 study procedures as directed by the investigators. Beth Israel Deaconess Medical Center, Brigham  
 18 and Women's Hospital or the funding source may stop the study at any time.

 19  
 20  
 21  
 22 **COSTS AND/OR PAYMENTS TO YOU**

 23  
 24 **COSTS COVERED BY STUDY**

 25 You will not be charged for the study drugs (Steroids, Vitamin C, Thiamine, Sodium Chloride) or  
 26 blood tests that are part of this research study. However, you and your insurance company will be  
 27 charged for other tests, procedures or medications of this study that are considered standard  
 28 treatment for your medical condition.

 29  
 30  
 31 **Co-PAYMENT/DEDUCTIBLE STATEMENT**

 32 You will be responsible for any co-payments or deductibles that are standard for your insurance  
 33 coverage.

 34  
 35  
 36 **PAYMENTS TO YOU:**

37 There is no payment to you for participating in this study.

 38  
 39 **COST OF RESEARCH RELATED INJURY:**

 40 If you are injured as a direct result of your participation in this study you should contact the  
 41 Investigator at the number provided under the section "Whom to Call if You Have Questions" in this  
 42 form. You will be offered the necessary care to treat your injury. You or your insurance company  
 43 will be billed for medical care and/or hospitalization related to this injury. You will be responsible for  
 44 all co-payments and deductibles required under your insurance. BIDMC will consider  
 45 reimbursement of injury related expenses not covered by your insurance on a case-by-case basis.  
 46 At this time there is no plan to reimburse you for items such as lost wages or lost time from work.  
 47 By signing this consent form you have not given up any legal rights.

 48  
 49  
 50  
 51 **OTHER IMPORTANT INFORMATION**

 52 A description of this clinical trial will be available on [www.ClinicalTrials.gov](http://www.ClinicalTrials.gov) as required by U.S. law.  
 53 This Web site will not include information that can identify you. At most, the Web site will include a  
 54 summary of the results. You can search this Web site at any time.

 55  
 56  
 57 **AUTHORIZATION FOR USE AND DISCLOSURE OF YOUR PROTECTED HEALTH**

58 Informed Consent – Part D

59 CCI Form: 6-2017

1  
2  
3 SUBJECT'S NAME:4 TITLE OF RESEARCH PROTOCOL: VITAMIN C, STEROIDS, AND THIAMINE IN  
5 SEPSIS AND SEPTIC SHOCK6 PRINCIPAL INVESTIGATOR'S NAME: MICHAEL DONNINO, MD (BIDMC)  
7 AND PETER HOU, MD (BWH)8  
9 PROTOCOL #: 2017P-000436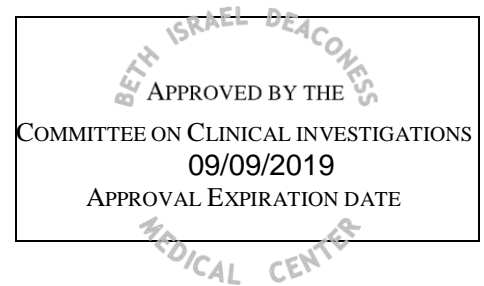10  
11 **INFORMATION**12 As part of this study, we will be collecting, using and sharing with others information about you.  
13 Please review this section carefully as it contains information about the federal privacy rules and the  
14 use and disclosure of your information.  
1516  
17 **PROTECTED HEALTH INFORMATION [PHI]**18 By signing this informed consent document, you are allowing the investigators and other authorized  
19 personnel to use [internally at BIDMC, BIDMC] and disclose [to people and organizations outside  
20 the BIDMC and BWH workforce identified in this consent] health information about you. This may  
21 include information about you that already exists (for example: your medical records and other  
22 sources of health information, demographic information and the results of any laboratory tests as  
23 well as any new information generated as part of this study. This is your Protected Health  
24 Information.  
2526  
27  
28 **PEOPLE/GROUPS AT BIDMC AND BWH WHO WILL SHARE AND USE YOUR PROTECTED HEALTH**  
29 **INFORMATION**30 Your Protected Health Information may be shared with and used by investigators working on this  
31 study, including the supporting research team (such as research assistants and coordinators,  
32 statisticians, data managers, laboratory personnel, pharmacy personnel, and administrative  
33 assistants), and may also be shared and used by other health care providers at BIDMC and BWH  
34 who have treated you in the past and have information relevant to the research, or who provide  
35 services to you in connection with the research. Your Protected Health Information may also be  
36 shared with the members and staff of the Committee on Clinical Investigations of Beth Israel  
37 Deaconess Medical Center or the Partners Human Research Committee at Brigham and Women's  
38 Hospital, which are responsible for reviewing studies for the protection of the research subjects.  
39  
4041  
42 **PEOPLE/GROUPS OUTSIDE OF BIDMC AND BWH WITH WHOM YOUR PROTECTED HEALTH INFORMATION**  
43 **WILL BE SHARED**44 We will take care to maintain confidentiality and privacy about you and your Protected Health  
45 Information. We may share your Protected Health Information with the following groups so that they  
46 may carry out their duties related to this study:  
47

- 48
- 
- 49
- 
- 50
- 
- 51
- 
- 52
- 
- 53
- 
- 54
- 
- 55
- 
- 56
- 
- 57
- 
- 58
- 
- 59
- 
- 60
- Other researchers and medical centers that are part of this study.
  - People from organizations that provide independent accreditation and oversight of hospitals and research.
  - Statisticians and other data monitors not affiliated with BIDMC or Partners.
  - The members and staff of any other IRBs (beyond the BIDMC Committee on Clinical Investigations) that oversee the research
  - Centralized data collectors
  - Your health insurance company



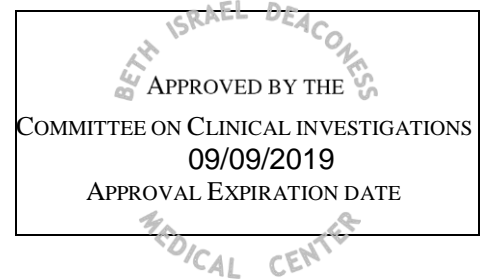

|                                                                                          |
|------------------------------------------------------------------------------------------|
| SUBJECT'S NAME:                                                                          |
| TITLE OF RESEARCH PROTOCOL: VITAMIN C, STEROIDS, AND THIAMINE IN SEPSIS AND SEPTIC SHOCK |
| PRINCIPAL INVESTIGATOR'S NAME: MICHAEL DONNINO, MD (BIDMC) AND PETER HOU, MD (BWH)       |
| PROTOCOL #: 2017P-000436                                                                 |

- The Food and Drug Administration [FDA], the Department of Health and Human Services [DHHS], the National Institute of Health [NIH], the Office for Human Research Protections [OHRP], and other federal and state agencies that may have jurisdiction over the research
- Hospital and Clinical Research Accrediting Agencies
- Data and Safety Monitoring boards that oversee this study

Those who receive your Protected Health Information during the course of the research may not be required by the federal privacy regulations to protect it, and they may make further disclosures to others and use your information without being subject to penalties under those laws.

#### WHY WE ARE USING AND SHARING YOUR PROTECTED HEALTH INFORMATION

The main reason for using and sharing your Protected Health Information is to conduct and oversee the research as described in this Informed Consent Document. There are many other reasons beyond the research for which BIDMC and BWH may use or disclose your Protected Health Information. Not all of these reasons require your express written authorization. For example, we will use and share your Protected Health Information to ensure that the research meets legal, institutional and accreditation requirements and to conduct public health activities. The various ways in which BIDMC and BWH may use and disclose your protected health information without your authorization are explained in a document called the Notice of Privacy Practices. If you have not received a copy of BIDMC's and BWH's Notice of Privacy Practices, please ask us for one and review it before signing this form. In addition to signing this document, you may also be asked to sign a BIDMC and BWH General Agreement form acknowledging that you have received the BIDMC Notice of Privacy Practices.

#### NO EXPIRATION DATE – RIGHT TO WITHDRAW AUTHORIZATION

Your authorization for the use and disclosure of your Protected Health Information in this Study shall never expire. However, you may withdraw your authorization for the use and disclosure of your Protected Health Information at any time provided you notify the Principal Investigator in writing. If you would like to take back your authorization so that your Protected Health Information can no longer be used in this study, please send a letter notifying the Principal Investigator of your withdrawal of your authorization to:

BIDMC: Dr. Michael Donnino at 330 Brookline Ave., Boston, MA 02215.

BWH: Dr. Peter Hou at Neville House 312C, 75 Francis Street, Boston, MA 02115

Please be aware that the investigators in this study will not be required to destroy or retrieve any of your Protected Health Information that has already been used or disclosed before the Principal Investigator receives your letter, and they are permitted to continue to use and disclose your previously collected information as necessary to complete the research.

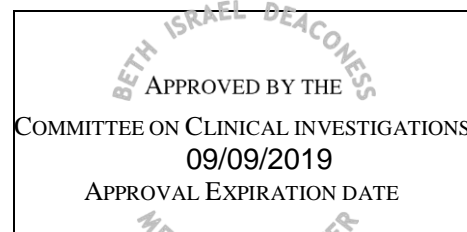

SUBJECT'S NAME:

TITLE OF RESEARCH PROTOCOL: VITAMIN C, STEROIDS, AND THIAMINE IN SEPSIS AND SEPTIC SHOCK

PRINCIPAL INVESTIGATOR'S NAME: MICHAEL DONNINO, MD (BIDMC) AND PETER HOU, MD (BWH)

PROTOCOL #: 2017P-000436

**REFUSAL TO SIGN**

Your clinical treatment may not be conditioned upon whether you sign the Authorization for Research. However, if you choose not to sign this informed consent document and authorization for the use and disclosure of your Protected Health Information, you will not be allowed to take part in the research study.

**RIGHT TO ACCESS AND COPY YOUR PHI**

If you wish to review or copy your Protected Health Information as it is made part of your medical record, you may do so after the completion or termination of the study by sending a letter to the Principal Investigator requesting a copy of your Protected Health Information. You may not be allowed to inspect or copy your Protected Health Information until this study is completed or terminated.

**ADDITIONAL CONTACT FOR QUESTIONS OR CONCERNS**

**BIDMC:** You may contact the Human Subjects Protection Office at [617] 975-8500 in the event that you would like to obtain information or to offer input about the research study. This office is independent of the investigator or investigator's research staff and can also assist with questions relating to your rights as a participant in research, which may include questions, concerns or complaints about your participation in the study.

**BWH:** If you want to speak with someone **not** directly involved in this research study, please contact the Partners Human Research Committee office. You can call them at [857] 282-1900. You can talk to them about:

- Your rights as a research subject
- Your concerns about the research
- A complaint about the research

Also, if you feel pressured to take part in this research study, or to continue with it, they want to know and can help.

**ICF REVISION DATES:**

10/23/17, 2/2/18, 02/16/18, 06/14/18, 08/07/18, 08/10/18



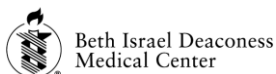

|                                                                                          |
|------------------------------------------------------------------------------------------|
| SUBJECT'S NAME:                                                                          |
| TITLE OF RESEARCH PROTOCOL: VITAMIN C, STEROIDS, AND THIAMINE IN SEPSIS AND SEPTIC SHOCK |
| PRINCIPAL INVESTIGATOR'S NAME: MICHAEL DONNINO, MD (BIDMC) AND PETER HOU, MD (BWH)       |
| PROTOCOL #: 2017P-000436                                                                 |

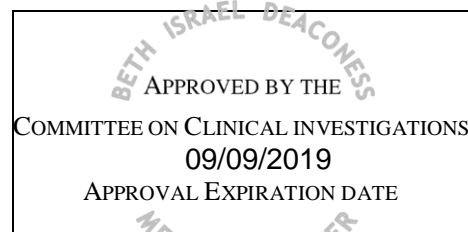

**CONSENT FOR CONTINUED RESEARCH PARTICIPATION**

I understand that I am currently participating in a research study. Permission for my participation in this study was obtained initially through from my legally authorized representative (surrogate). I have now recovered to the point where I feel that I can provide direct consent for continued participation in this research study.

I understand that if I decide not to continue in this study, it will not affect my relationship with my doctor or with Beth Israel Deaconess Medical Center and will not result in any penalty or loss of benefits to which I am otherwise entitled.

The study has been described to me and all of my questions have been answered. I have been told what to expect if I take part in this study, including risks and possible benefits.

Any additional questions or concerns about any aspect of this study will be answered by the researchers. Questions I might have about my rights as a research participant will be answered by the Human Subjects Protection Office (HSPO) at [617]667-0469

By signing below, I agree to continue my participation in this research study. A copy of this consent form will be given to me.

|                         |                            |       |
|-------------------------|----------------------------|-------|
| _____                   | _____                      | _____ |
| Participant's Signature | Participant's Name (Print) | Date  |

***The subject has been given the opportunity to read this consent form and to ask questions before signing, and has been given a copy.***

|                                           |       |
|-------------------------------------------|-------|
| _____                                     | _____ |
| SIGNATURE OF INVESTIGATOR/Co-Investigator | DATE  |
| _____                                     | _____ |
| PRINT INVESTIGATOR'S/Co-Investigator's    | NAME  |

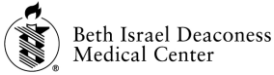

|                                                                                          |
|------------------------------------------------------------------------------------------|
| SUBJECT'S NAME:                                                                          |
| TITLE OF RESEARCH PROTOCOL: VITAMIN C, STEROIDS, AND THIAMINE IN SEPSIS AND SEPTIC SHOCK |
| PRINCIPAL INVESTIGATOR'S NAME: MICHAEL DONNINO, MD (BIDMC) AND PETER HOU, MD (BWH)       |
| PROTOCOL #: 2017P-000436                                                                 |

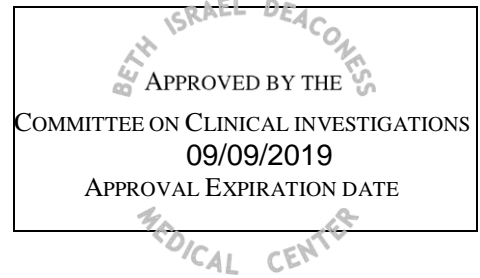

**THE FOLLOWING SECTIONS ARE NOT NEEDED FOR ALL STUDIES AND SHOULD BE UTILIZED AS INDICATED:**

**If the subject is able to speak and understand English but is not able to read or write**

I was present during the entire oral presentation of the informed consent and witnessed the subject's agreement to participate in the study.

Signature of Witness: \_\_\_\_\_

Printed Name of Witness: \_\_\_\_\_

Date: \_\_\_\_\_

**If the subject is able to understand English but is not physically able to read or write or see**

I was present during the entire oral presentation of the informed consent and witnessed the subject's agreement to participate in the study.

Signature of Witness: \_\_\_\_\_

Printed Name of Witness: \_\_\_\_\_

Date: \_\_\_\_\_

**If the subject is not English speaking and signed the translated Short Form in lieu of the English consent document.**

As someone who understands both English and the language spoken by the subject, I interpreted, in the subject's language, the researcher's presentation of the English consent form. The subject was given the opportunity to ask questions.

Signature of Interpreter: \_\_\_\_\_

Printed name of Interpreter: \_\_\_\_\_

Date: \_\_\_\_\_



STANDARD PROTOCOL ITEMS: RECOMMENDATIONS FOR INTERVENTIONAL TRIALS

## Ascorbic acid, Corticosteroids, and Thiamine in Sepsis (ACTS) Clinical Trial: SPIRIT 2013 Checklist

| Section/item                      | Item No | Description                                                                                                                                                                                                                                                                              | Page Number on which item is reported |
|-----------------------------------|---------|------------------------------------------------------------------------------------------------------------------------------------------------------------------------------------------------------------------------------------------------------------------------------------------|---------------------------------------|
| <b>Administrative information</b> |         |                                                                                                                                                                                                                                                                                          |                                       |
| Title                             | 1       | Descriptive title identifying the study design, population, interventions, and, if applicable, trial acronym                                                                                                                                                                             | 1                                     |
| Trial registration                | 2a      | Trial identifier and registry name. If not yet registered, name of intended registry                                                                                                                                                                                                     | 2                                     |
|                                   | 2b      | All items from the World Health Organization Trial Registration Data Set                                                                                                                                                                                                                 | 2                                     |
| Protocol version                  | 3       | Date and version identifier                                                                                                                                                                                                                                                              | See referenced full protocol          |
| Funding                           | 4       | Sources and types of financial, material, and other support                                                                                                                                                                                                                              | 18                                    |
| Roles and responsibilities        | 5a      | Names, affiliations, and roles of protocol contributors                                                                                                                                                                                                                                  | 1, 18                                 |
|                                   | 5b      | Name and contact information for the trial sponsor                                                                                                                                                                                                                                       | 18                                    |
|                                   | 5c      | Role of study sponsor and funders, if any, in study design; collection, management, analysis, and interpretation of data; writing of the report; and the decision to submit the report for publication, including whether they will have ultimate authority over any of these activities | 18                                    |
|                                   | 5d      | Composition, roles, and responsibilities of the coordinating centre, steering committee, endpoint adjudication committee, data management team, and other individuals or groups overseeing the trial, if applicable (see Item 21a for data monitoring committee)                         | See referenced full protocol          |
| <b>Introduction</b>               |         |                                                                                                                                                                                                                                                                                          |                                       |

|                                                           |     |                                                                                                                                                                                                                                                                                                                                                                                |                              |
|-----------------------------------------------------------|-----|--------------------------------------------------------------------------------------------------------------------------------------------------------------------------------------------------------------------------------------------------------------------------------------------------------------------------------------------------------------------------------|------------------------------|
| Background and rationale                                  | 6a  | Description of research question and justification for undertaking the trial, including summary of relevant studies (published and unpublished) examining benefits and harms for each intervention                                                                                                                                                                             | 4                            |
|                                                           | 6b  | Explanation for choice of comparators                                                                                                                                                                                                                                                                                                                                          | 7                            |
| Objectives                                                | 7   | Specific objectives or hypotheses                                                                                                                                                                                                                                                                                                                                              | 4                            |
| Trial design                                              | 8   | Description of trial design including type of trial (eg, parallel group, crossover, factorial, single group), allocation ratio, and framework (eg, superiority, equivalence, noninferiority, exploratory)                                                                                                                                                                      | 4                            |
| <b>Methods: Participants, interventions, and outcomes</b> |     |                                                                                                                                                                                                                                                                                                                                                                                |                              |
| Study setting                                             | 9   | Description of study settings (eg, community clinic, academic hospital) and list of countries where data will be collected. Reference to where list of study sites can be obtained                                                                                                                                                                                             | 5                            |
| Eligibility criteria                                      | 10  | Inclusion and exclusion criteria for participants. If applicable, eligibility criteria for study centres and individuals who will perform the interventions (eg, surgeons, psychotherapists)                                                                                                                                                                                   | 5                            |
| Interventions                                             | 11a | Interventions for each group with sufficient detail to allow replication, including how and when they will be administered                                                                                                                                                                                                                                                     | 6                            |
|                                                           | 11b | Criteria for discontinuing or modifying allocated interventions for a given trial participant (eg, drug dose change in response to harms, participant request, or improving/worsening disease)                                                                                                                                                                                 | 16                           |
|                                                           | 11c | Strategies to improve adherence to intervention protocols, and any procedures for monitoring adherence (eg, drug tablet return, laboratory tests)                                                                                                                                                                                                                              | See referenced full protocol |
|                                                           | 11d | Relevant concomitant care and interventions that are permitted or prohibited during the trial                                                                                                                                                                                                                                                                                  | See referenced full protocol |
| Outcomes                                                  | 12  | Primary, secondary, and other outcomes, including the specific measurement variable (eg, systolic blood pressure), analysis metric (eg, change from baseline, final value, time to event), method of aggregation (eg, median, proportion), and time point for each outcome. Explanation of the clinical relevance of chosen efficacy and harm outcomes is strongly recommended | 7,8                          |

|                                                                     |     |                                                                                                                                                                                                                                                                                                                                                          |                              |
|---------------------------------------------------------------------|-----|----------------------------------------------------------------------------------------------------------------------------------------------------------------------------------------------------------------------------------------------------------------------------------------------------------------------------------------------------------|------------------------------|
| Participant timeline                                                | 13  | Time schedule of enrolment, interventions (including any run-ins and washouts), assessments, and visits for participants. A schematic diagram is highly recommended (see Figure)                                                                                                                                                                         | See referenced full protocol |
| Sample size                                                         | 14  | Estimated number of participants needed to achieve study objectives and how it was determined, including clinical and statistical assumptions supporting any sample size calculations                                                                                                                                                                    | 9                            |
| Recruitment                                                         | 15  | Strategies for achieving adequate participant enrolment to reach target sample size                                                                                                                                                                                                                                                                      | 9                            |
| <b>Methods: Assignment of interventions (for controlled trials)</b> |     |                                                                                                                                                                                                                                                                                                                                                          |                              |
| Allocation:                                                         |     |                                                                                                                                                                                                                                                                                                                                                          |                              |
| Sequence generation                                                 | 16a | Method of generating the allocation sequence (eg, computer-generated random numbers), and list of any factors for stratification. To reduce predictability of a random sequence, details of any planned restriction (eg, blocking) should be provided in a separate document that is unavailable to those who enrol participants or assign interventions | 6                            |
| Allocation concealment mechanism                                    | 16b | Mechanism of implementing the allocation sequence (eg, central telephone; sequentially numbered, opaque, sealed envelopes), describing any steps to conceal the sequence until interventions are assigned                                                                                                                                                | 6                            |
| Implementation                                                      | 16c | Who will generate the allocation sequence, who will enrol participants, and who will assign participants to interventions                                                                                                                                                                                                                                | 6                            |
| Blinding (masking)                                                  | 17a | Who will be blinded after assignment to interventions (eg, trial participants, care providers, outcome assessors, data analysts), and how                                                                                                                                                                                                                | 6                            |
|                                                                     | 17b | If blinded, circumstances under which unblinding is permissible, and procedure for revealing a participant's allocated intervention during the trial                                                                                                                                                                                                     | 6                            |
| <b>Methods: Data collection, management, and analysis</b>           |     |                                                                                                                                                                                                                                                                                                                                                          |                              |



|                                                          |                            |     |                                                                                                                                                                                                                                                                                                                                                                                                              |                              |
|----------------------------------------------------------|----------------------------|-----|--------------------------------------------------------------------------------------------------------------------------------------------------------------------------------------------------------------------------------------------------------------------------------------------------------------------------------------------------------------------------------------------------------------|------------------------------|
| 1<br>2<br>3<br>4<br>5<br>6<br>7<br>8<br>9<br>10<br>11    | Data collection methods    | 18a | Plans for assessment and collection of outcome, baseline, and other trial data, including any related processes to promote data quality (eg, duplicate measurements, training of assessors) and a description of study instruments (eg, questionnaires, laboratory tests) along with their reliability and validity, if known. Reference to where data collection forms can be found, if not in the protocol | 6                            |
| 12<br>13<br>14<br>15<br>16<br>17                         |                            | 18b | Plans to promote participant retention and complete follow-up, including list of any outcome data to be collected for participants who discontinue or deviate from intervention protocols                                                                                                                                                                                                                    | 6                            |
| 18<br>19<br>20<br>21<br>22<br>23<br>24<br>25             | Data management            | 19  | Plans for data entry, coding, security, and storage, including any related processes to promote data quality (eg, double data entry; range checks for data values). Reference to where details of data management procedures can be found, if not in the protocol                                                                                                                                            | 6                            |
| 26<br>27<br>28<br>29<br>30<br>31                         | Statistical methods        | 20a | Statistical methods for analysing primary and secondary outcomes. Reference to where other details of the statistical analysis plan can be found, if not in the protocol                                                                                                                                                                                                                                     | 9-13                         |
| 32<br>33<br>34                                           |                            | 20b | Methods for any additional analyses (eg, subgroup and adjusted analyses)                                                                                                                                                                                                                                                                                                                                     | 9-13                         |
| 35<br>36<br>37<br>38<br>39<br>40                         |                            | 20c | Definition of analysis population relating to protocol non-adherence (eg, as randomised analysis), and any statistical methods to handle missing data (eg, multiple imputation)                                                                                                                                                                                                                              | 9-13                         |
| 41<br>42                                                 | <b>Methods: Monitoring</b> |     |                                                                                                                                                                                                                                                                                                                                                                                                              |                              |
| 43<br>44<br>45<br>46<br>47<br>48<br>49<br>50<br>51<br>52 | Data monitoring            | 21a | Composition of data monitoring committee (DMC); summary of its role and reporting structure; statement of whether it is independent from the sponsor and competing interests; and reference to where further details about its charter can be found, if not in the protocol. Alternatively, an explanation of why a DMC is not needed                                                                        | See referenced full protocol |
| 53<br>54<br>55<br>56<br>57<br>58<br>59<br>60             |                            | 21b | Description of any interim analyses and stopping guidelines, including who will have access to these interim results and make the final decision to terminate the trial                                                                                                                                                                                                                                      | 7                            |

|                                 |     |                                                                                                                                                                                                                                                                                     |                                    |
|---------------------------------|-----|-------------------------------------------------------------------------------------------------------------------------------------------------------------------------------------------------------------------------------------------------------------------------------------|------------------------------------|
| Harms                           | 22  | Plans for collecting, assessing, reporting, and managing solicited and spontaneously reported adverse events and other unintended effects of trial interventions or trial conduct                                                                                                   | 14                                 |
| Auditing                        | 23  | Frequency and procedures for auditing trial conduct, if any, and whether the process will be independent from investigators and the sponsor                                                                                                                                         | Information available upon request |
| <b>Ethics and dissemination</b> |     |                                                                                                                                                                                                                                                                                     |                                    |
| Research ethics approval        | 24  | Plans for seeking research ethics committee/institutional review board (REC/IRB) approval                                                                                                                                                                                           | 15                                 |
| Protocol amendments             | 25  | Plans for communicating important protocol modifications (eg, changes to eligibility criteria, outcomes, analyses) to relevant parties (eg, investigators, REC/IRBs, trial participants, trial registries, journals, regulators)                                                    | Information available upon request |
| Consent or assent               | 26a | Who will obtain informed consent or assent from potential trial participants or authorised surrogates, and how (see Item 32)                                                                                                                                                        | 16                                 |
|                                 | 26b | Additional consent provisions for collection and use of participant data and biological specimens in ancillary studies, if applicable                                                                                                                                               | Information available upon request |
| Confidentiality                 | 27  | How personal information about potential and enrolled participants will be collected, shared, and maintained in order to protect confidentiality before, during, and after the trial                                                                                                | 6                                  |
| Declaration of interests        | 28  | Financial and other competing interests for principal investigators for the overall trial and each study site                                                                                                                                                                       | 18                                 |
| Access to data                  | 29  | Statement of who will have access to the final trial dataset, and disclosure of contractual agreements that limit such access for investigators                                                                                                                                     | 16                                 |
| Ancillary and post-trial care   | 30  | Provisions, if any, for ancillary and post-trial care, and for compensation to those who suffer harm from trial participation                                                                                                                                                       | N/A                                |
| Dissemination policy            | 31a | Plans for investigators and sponsor to communicate trial results to participants, healthcare professionals, the public, and other relevant groups (eg, via publication, reporting in results databases, or other data sharing arrangements), including any publication restrictions | 16                                 |

|                            |     |                                                                                                                                                                                                |                              |
|----------------------------|-----|------------------------------------------------------------------------------------------------------------------------------------------------------------------------------------------------|------------------------------|
|                            | 31b | Authorship eligibility guidelines and any intended use of professional writers                                                                                                                 | See referenced full protocol |
|                            | 31c | Plans, if any, for granting public access to the full protocol, participant-level dataset, and statistical code                                                                                | 16                           |
| <b>Appendices</b>          |     |                                                                                                                                                                                                |                              |
| Informed consent materials | 32  | Model consent form and other related documentation given to participants and authorised surrogates                                                                                             | Available upon request       |
| Biological specimens       | 33  | Plans for collection, laboratory evaluation, and storage of biological specimens for genetic or molecular analysis in the current trial and for future use in ancillary studies, if applicable | See referenced full protocol |

# BMJ Open

## The Ascorbic Acid, Corticosteroids, and Thiamine in Sepsis (ACTS) Protocol and Statistical Analysis Plan: a prospective, multi-center, double-blind, randomized, placebo controlled, clinical trial

|                                 |                                                                                                                                                                                                                                                                                                                                                                                                          |
|---------------------------------|----------------------------------------------------------------------------------------------------------------------------------------------------------------------------------------------------------------------------------------------------------------------------------------------------------------------------------------------------------------------------------------------------------|
| Journal:                        | <i>BMJ Open</i>                                                                                                                                                                                                                                                                                                                                                                                          |
| Manuscript ID                   | bmjopen-2019-034406.R2                                                                                                                                                                                                                                                                                                                                                                                   |
| Article Type:                   | Protocol                                                                                                                                                                                                                                                                                                                                                                                                 |
| Date Submitted by the Author:   | 20-Nov-2019                                                                                                                                                                                                                                                                                                                                                                                              |
| Complete List of Authors:       | Moskowitz, Ari ; Harvard University, Yankama, Tuyen ; Beth Israel Deaconess Medical Center, Andersen, Lars; Aarhus University Hospital Dermato-Venerological Department<br>David T, Huang; University of Pittsburgh<br>Donnino, Michael W.; Beth Israel Deaconess Medical Center<br>Grossestreuer, Anne ; Beth Israel Deaconess Medical Center, Emergency Medicine<br>Clinical Trial Investigators, ACTS |
| <b>Primary Subject Heading</b>: | Intensive care                                                                                                                                                                                                                                                                                                                                                                                           |
| Secondary Subject Heading:      | Research methods, Nutrition and metabolism, Infectious diseases                                                                                                                                                                                                                                                                                                                                          |
| Keywords:                       | INFECTIOUS DISEASES, INTENSIVE & CRITICAL CARE, SEPSIS, ASCORBIC ACID, THIAMINE                                                                                                                                                                                                                                                                                                                          |
|                                 |                                                                                                                                                                                                                                                                                                                                                                                                          |

SCHOLARONE™  
Manuscripts

1  
2  
3 **The Ascorbic Acid, Corticosteroids, and Thiamine in Sepsis (ACTS) Protocol and Statistical**  
4 **Analysis Plan: a prospective, multi-center, double-blind, randomized, placebo controlled,**  
5 **clinical trial**  
6  
7

8 Authors: Ari Moskowitz MD<sup>1,2\*</sup>, Tuyen T. Yankama MPH<sup>1\*</sup>, Lars W. Andersen, MD, MPH, PhD,  
9 DMSc<sup>1,3</sup>, David T Huang, MD, MPH<sup>4,5</sup>, Michael W. Donnino MD<sup>1,6</sup>, Anne V. Grossestreuer  
10 PhD<sup>1</sup>, for the ACTS Clinical Trial Investigators  
11  
12

13 \*These two authors contributed equally to the work  
14

15 <sup>1</sup> Center for Resuscitation Science, Department of Emergency Medicine, Beth Israel  
16 Deaconess Medical Center, Boston, MA, USA

17 <sup>2</sup> Department of Internal Medicine, Division of Pulmonary, Critical Care, and Sleep Medicine,  
18 Beth Israel Deaconess Medical Center, Boston, MA, USA

19 <sup>3</sup> Research Center for Emergency Medicine, Department of Clinical Medicine, Aarhus  
20 University Hospital and Aarhus University, Aarhus, Denmark

21 <sup>4</sup> Department of Critical Care Medicine, University of Pittsburgh, Pittsburgh, USA

22 <sup>5</sup> Department of Emergency Medicine, University of Pittsburgh, Pittsburgh, USA

23 <sup>6</sup> Department of Medicine, Division of Pulmonary Critical Care, Beth Israel Deaconess  
24 Medical Center, Boston, MA, USA  
25  
26  
27  
28

29 **Corresponding author:**

30 Ari Moskowitz, MD

31 Department of Emergency Medicine

32 Beth Israel Deaconess Medical Center

33 One Deaconess Road

34 Boston MA 02215

35 (617) 754-3463

36 [amoskowi@bidmc.harvard.edu](mailto:amoskowi@bidmc.harvard.edu)  
37  
38  
39  
40  
41  
42  
43  
44  
45  
46  
47  
48  
49  
50  
51  
52  
53  
54  
55  
56  
57  
58  
59  
60

1  
2  
3 **1 Abstract**  
4

5 **2 Introduction:** Septic shock is a common and highly morbid condition. To date, there is no  
6  
7  
8 3 specific therapy proven to attenuate organ injury in septic shock. Recent studies have  
9  
10 4 suggested a role for the combination of ascorbic acid, corticosteroids, and thiamine,  
11  
12  
13 5 although randomized data is lacking.  
14

15 **6 Methods and Analysis:** The Ascorbic Acid, Corticosteroids, and Thiamine in Sepsis (ACTS)  
16  
17  
18 7 trial is a multi-center, double-blind, randomized, placebo-controlled clinical trial that aims to  
19  
20 8 determine the impact of ascorbic acid, corticosteroids, and thiamine vs. placebo on organ  
21  
22  
23 9 injury and mortality in patients with septic shock. Patients are randomized to receive  
24  
25 10 1,500mg of ascorbic acid, 100mg of thiamine, and 50mg of hydrocortisone parenterally vs.  
26  
27  
28 11 matching placebo every 6 hours for 4 days. Clinical and laboratory data are collected at time  
29  
30 12 of study enrollment, at 24-hours, 72-hours, and at 120-hours. The primary end-point for the  
31  
32  
33 13 trial is change in the Sequential Organ Failure Assessment (SOFA) score between enrollment  
34  
35 14 and 72-hours. Additional key secondary outcomes include the incidence of renal failure and  
36  
37  
38 15 30-day mortality.  
39

40 **16 Ethics and Dissemination:** The study was approved by the International Review Board (IRB)  
41  
42  
43 17 of each participating study site. Study findings will be disseminated through peer-reviewed  
44  
45 18 publications and conference presentations.  
46

47 **19 Trial Registration:** The trial is registered on clinicaltrials.gov (NCT03389555). It was posted  
48  
49 20 January 3<sup>rd</sup>, 2018.  
50

51  
52 21  
53

54  
55 22  
56

57  
58 23  
59

60  
24

## 1 **Strengths and Limitations of this Study**

- 2 • This article describes a multicenter, randomized, blinded clinical trial of ascorbic acid,  
3 corticosteroids, and thiamine vs. placebo in septic shock.
- 4 • The described study will be among the earliest completed randomized trials testing the  
5 promising combination of ascorbic acid, corticosteroids, and thiamine in septic shock,  
6 and thus will fill an important knowledge gap.
- 7 • The primary outcome for the trial is change in the Sequential Organ Failure Assessment  
8 (SOFA) score between enrollment and 72-hours after enrollment, which will provide  
9 important information regarding the effect of ascorbic acid, corticosteroids, and thiamine  
10 on the trajectory of organ injury in septic shock.
- 11 • 30-day mortality is a secondary outcome for this study, but the trial may be  
12 underpowered for this important patient-centered outcome.

## 1 Introduction:

2 The Ascorbic Acid, Corticosteroids, and Thiamine in Sepsis (ACTS) trial was developed to  
3 assess the clinical efficacy and safety of ascorbic acid, hydrocortisone, and thiamine in  
4 patients with septic shock. The rationale for this trial has previously been published by the  
5 trial investigators<sup>1</sup>. In short, there is presently no directed therapy proven to attenuate  
6 organ injury in septic shock. Whereas the traditional paradigm of organ injury in sepsis has  
7 focused on impaired oxygen delivery, there is increasing evidence that non-oxygen delivery  
8 dependent mechanisms of organ injury may play an important role. In particular,  
9 mitochondrial dysfunction has been recognized as a likely contributor to organ injury in  
10 many sepsis victims.<sup>2,3</sup> Ascorbic acid, a potent antioxidant, and thiamine, a key co-factor in  
11 aerobic respiration, may have roles as mitochondrial resuscitators in septic shock. In  
12 observational studies and small clinical trials, both ascorbic acid and thiamine have shown  
13 promise as directed therapies for the attenuation of organ injury in sepsis.<sup>4,5</sup> More recently,  
14 a phase II clinical trial of high-dose ascorbic acid in sepsis victims with the acute respiratory  
15 distress syndrome found that the intervention was safe and may have improved mortality.  
16 Notably however, ascorbic acid did not attenuate organ injury as measured by the  
17 sequential organ failure assessment (SOFA) score, although this may have resulted from an  
18 imbalance in early mortality between groups, resulting in excess missing data from the  
19 sickest patients in the placebo arm.<sup>6</sup>

20

21 Herein we describe the protocol and proposed statistical analysis plan (SAP) for the ACTS  
22 trial, which was designed by the trial chief investigators and statisticians. All analyses  
23 specified in this SAP have been defined prospectively. The complete study protocol can be  
24 found on [clinicaltrials.gov](http://clinicaltrials.gov)<sup>7</sup>.



1  
2  
3 1  
4  
5  
6 2

## Methods and Analysis:

### 3 Trial design

4 The ACTS trial is a multicenter, double-blind, randomized, placebo-controlled, parallel  
5 group, superiority trial of ascorbic acid, hydrocortisone, and thiamine in patients with septic  
6 shock. A total of 200 patients will be randomized to receive ascorbic acid (1.5g every 6  
7 hours), hydrocortisone (50mg every 6 hours), and thiamine (100mg every 6 hours) or  
8 placebo for 4 days or until discharge from the intensive care unit (ICU). The primary  
9 hypothesis is that the administration of ascorbic acid, hydrocortisone, and thiamine will lead  
10 to a greater decrease in Sequential Organ Failure Assessment (SOFA) score from enrollment  
11 to 72 hours post-enrollment in patients with septic shock as compared to placebo. The trial  
12 is registered on clinicaltrials.gov (NCT03389555).

13

### 14 Patient population

15 Patients will be enrolled from 14 academic centers in the United States. Patients will be  
16 enrolled without respect to age, sex, or race. Patients will be enrolled within 24-hours of  
17 meeting all inclusion criteria.

18

#### *Inclusion criteria*

1. Age 18 years or older
2. Suspected (cultures drawn and antibiotic given) or confirmed (via culture results) infection
3. Receiving (continuous infusion) a vasopressor agent (norepinephrine, phenylephrine, epinephrine, dopamine, vasopressin, or angiotensin II) for hypotension related primarily to sepsis as opposed to another cause of hypotension (e.g. bleeding, cardiogenic shock)

### *Exclusion criteria*

1. Member of a protected population (pregnant, prisoner)
2. Known kidney stones within the past 1 year (except for asymptomatic, incidentally noted stones on imaging)
3. End stage renal disease (ESRD) requiring dialysis\*
4. Known Glucose-6-Phosphate Dehydrogenase deficiency
5. Known Hemochromatosis
6. Comfort Measures Only status
7. Anticipated death within 24-hours despite maximal therapy (as determined by the enrolling physician)
8. Receiving supplemental thiamine in a dose greater than that contained in a multivitamin
9. Clinical indication for steroids (e.g. chronic use) as determined by the clinical team providing this drug
10. Clinical indication for thiamine as determined by the clinical team providing this drug
11. Clinical indication for ascorbic acid as determined by the clinical team providing this drug
12. Known allergy to vitamin C, hydrocortisone, or thiamine

1 \*This exclusion criterion was changed from Stage IIIb chronic kidney disease after 19  
2 patients were enrolled

3

### 4 Randomization and blinding

5 Participants will be randomized in a 1:1 ratio to either the combination of ascorbic acid,  
6 hydrocortisone, and thiamine or placebo in blocks with random sizes of 2 or 4. The

1 randomization will be stratified according to site. An independent statistician created the  
2 randomization list using a random number generator. Each site's randomization list will be  
3 held by the local research pharmacy, which then will inform the research team of treatment  
4 allocation at the time of randomization. With the exception of the research pharmacist (who  
5 is not involved in patient care, monitoring, or other study activities), the patient and all  
6 clinical and research staff will be blinded to study arm allocation.

7  
8 As ascorbic acid possesses a yellow tinge, the bags containing ascorbic acid will be covered  
9 with light-protective bags. In testing, after dilution there was no distinguishing  
10 characteristics of the ascorbic acid vs. placebo in the intravenous line tubing. Ascorbic acid,  
11 hydrocortisone, and thiamine are not known to have distinctive rapid effects which could  
12 lead to unblinding.

#### 14 Intervention

15 Trial participants will be randomized to ascorbic acid (1.5g every 6 hours), hydrocortisone  
16 (50mg every 6 hours), and thiamine (100mg every 6 hours) or placebo for 4 days or until  
17 discharge from the ICU. The ascorbic acid and thiamine will be diluted in 100ml of 0.9%NaCl  
18 crystalloid fluid and the hydrocortisone was given as a 'push' dose.

19  
20 A placebo (as opposed to a hydrocortisone only control arm) was selected to allow for  
21 clinician discretion with regards to the use of corticosteroids in septic shock, thus avoiding  
22 potential deviations from 'usual care' associated with the comparison of two fixed  
23 treatment arms. We note that study enrollment began prior to publication of the ADRENAL  
24 and APPROCHS trials<sup>8,9</sup>.

1  
2  
3 1  
4  
5  
6 2

### Data Collection and Monitoring Plan

3 All data will be collected by local study staff and entered into an online case report form  
4 (CRF) using the REDCap Cloud ([www.redcapcloud.com](http://www.redcapcloud.com)) SaaS-based Unified Data  
5 Management system. Data will be monitored automatically through REDCap Cloud and  
6 manually by the data coordinating center. In-person site visits by study monitors will be  
7 conducted at each site early in study enrollment and again at study close-out for verification  
8 of primary data, regulatory processes, and pharmacy standards.

9

### Patient and Public Involvement

11 No patients will be involved in the design, recruitment, or conduct of the study. We  
12 anticipate disseminating the results of the study through publication in a high-impact  
13 scientific journal. Patients or their representatives will assess the burden of the intervention  
14 at the time of randomization through the informed consent process.

15

### Interim analyses

17 An independent Data Safety and Monitoring Board (DSMB) will review blinded (group A vs  
18 group B) data to examine patient characteristics, treatment compliance, outcomes and  
19 adverse events, on three occasions (after enrollment of 50, 100, and 150 patients). The trial  
20 will not be stopped based on evidence of intervention futility or efficacy. The trial can be  
21 stopped for excess mortality in the intervention group. If one group appears to have excess  
22 mortality, the DSMB will request unblinding and a detailed evaluation of the two groups and  
23 those who died will take place. A recommendation to discontinue the trial for safety would

1  
2  
3 1 be made only after a thorough review of all available data to ensure that differences were  
4  
5  
6 2 not due to imbalances or extenuating circumstances between the two study groups.  
7

8 3

9  
10 4 Outcomes

11  
12  
13 5 *Primary outcome*

14  
15 6 The primary outcome is the absolute change in the SOFA score from enrollment to 72 hours  
16  
17 7 after enrollment. The SOFA score will be defined using a modification in which the SaO<sub>2</sub>/FiO<sub>2</sub>  
18  
19 8 ratio is substituted for the PaO<sub>2</sub>/FiO<sub>2</sub> ratio as has been previously described<sup>10</sup>. This modified  
20  
21 9 score (Table 1) will be used so that participants without an existing arterial catheter can be  
22  
23 10 spared arterial puncture.  
24  
25  
26  
27

28 11

29  
30 12 *Key secondary outcomes*

- 31  
32 13 ● All-cause mortality over the first 30 days after initial study drug administration.  
33  
34 14 ● Renal failure during the index ICU, which is a composite outcome of all-cause death or  
35  
36 15 KDIGO stage 3 acute renal failure (as defined in Table 2) within the index ICU stay after  
37  
38 16 enrollment. Patients who met KDIGO 3 acute renal failure criteria at the time of initial  
39  
40 17 study drug administration would not be identified as having an adverse kidney event  
41  
42 18 unless they died during the index ICU stay. Patients who were alive, not in the ICU, and  
43  
44 19 had not developed acute renal failure while in the ICU were assumed to not have renal  
45  
46 20 failure for the purposes of this analysis.  
47  
48  
49  
50

51 21

52  
53  
54 22 *Additional secondary outcomes*

- 55  
56 23 ● 72-hour change in each individual component of the SOFA score  
57  
58 24 ● Number of ICU-free days in the first 28 days following enrollment  
59  
60

- 1 ● All-cause mortality to ICU discharge and hospital discharge
  - 2 ● Hospital disposition in patients who survived to hospital discharge
  - 3 ● Number of shock-free days over the first 7 days after enrollment
  - 4 ● Number of ventilator-free days over the first 7 days after enrollment
  - 5 ● Incidence of delirium as measured by the CAM-ICU<sup>11</sup> on study day 3
- 6 Further information on how secondary outcomes are defined can be found in Table 2.

### 8 *Safety outcomes*

9 Patients enrolled in the trial will be assessed daily during their hospitalization for any  
10 adverse event not anticipated as part of the overall disease process. Expected adverse  
11 events can be found in Table 3. The relatedness of the adverse event to study drug will also  
12 be assessed by the site principal investigator.

### 14 Sample size

15 The study sample will have 200 evaluable patients (100 per group), providing >99% power  
16 to detect a difference of 2 in the decrease of SOFA score over 72 hours (a decrease of 6  
17 [standard deviation(SD): 4] in the treatment arm compared to a decrease of 4 [SD: 2] in the  
18 placebo arm, 33.3% relative change) using a t-test of unequal variance and an alpha of 0.05.  
19 This was based on preliminary data from a pre-post study using the same intervention from  
20 Marik et al.<sup>12</sup>, which found a change of 4 in the decrease of SOFA over 72 hours (a decrease  
21 of 4.8±2.4 in the treatment arm compared to a decrease of 0.8±2.7 in the placebo arm,  
22 81.3% relative change). The greater expected absolute change in SOFA score in the  
23 treatment arm of the present trial is based on an expectation that patients enrolled will

1  
2  
3 1 have higher illness severity (and thus higher SOFA scores) at baseline given that patients are  
4  
5  
6 2 only included if receiving a vasopressor.  
7

8 3  
9  
10 4 This sample size will allow for adequate power to detect a difference in 30-day mortality.

11  
12  
13 5 We anticipate that the control group will have a mortality of 40%, based on previous data<sup>5</sup>,  
14  
15 6 <sup>12,13</sup> and estimate a treatment effect of 50% (risk ratio: 0.50) resulting in a mortality of 20%  
16  
17  
18 7 in the treatment group. With these estimates, 182 participants will lead to 80% power.  
19

20 8  
21  
22  
23 9 Evaluable patients include those who receive at least one dose of study drug. If a patient is  
24  
25 10 randomized but does not ultimately receive study drug, they will be included in the patient  
26  
27  
28 11 flow diagram with the reason for withholding study drug provided.  
29

30 12

### 31 32 13 Statistical analysis

#### 33 34 14 *Analysis principles*

35  
36  
37 15 Analyses will be conducted on a modified intention-to-treat (ITT) basis: all participants  
38  
39  
40 16 receiving at least the first dose of the study medications will be analyzed according to the  
41  
42 17 group to which they were assigned, regardless of treatment compliance after the first dose.  
43  
44  
45 18 This approach is unbiased while increasing precision in a blinded trial<sup>14</sup>. The analysis will be  
46  
47 19 performed after the last enrolled patient has been followed to 30 days.  
48

49 20

50  
51  
52 21 The analyses of primary and secondary outcomes will control for site to account for  
53  
54 22 randomization stratification<sup>15</sup>. Pre-specified subgroup analyses will be conducted regardless  
55  
56  
57 23 of whether a statistically significant treatment effect on the primary outcome is observed in  
58  
59 24 the overall sample. Covariates included in each analysis are specified in the sections below  
60

1 and analyses will not be additionally adjusted for potential imbalances in the treatment  
2 groups.  
3  
4 No formal adjustments for multiplicity of testing will be applied, but the outcome will be  
5 ordered by degree of importance (i.e., primary versus secondary) and significant test results  
6 will be interpreted in light of the multiple comparisons made.  
7

8 All tests will be two-sided and the nominal level of statistical significance ( $\alpha$ ) will be 5%. All  
9 confidence intervals will have 95% coverage. All statistics will be performed using STATA,  
10 version 15 (College Station, TX, StataCorp LP, USA).  
11

### 12 *Trial profile*

13 The flow of patients through the trial will be shown using a Consolidated Standards of  
14 Reporting Trials diagram (CONSORT)<sup>16</sup>. This will include the number of screened patients  
15 who met study inclusion criteria, the number of patients who were included, and exclusion  
16 reasons for non-included patients.  
17

### 18 *Baseline characteristics*

19 A description of the baseline characteristics will be presented by treatment group (Table 4).  
20 Categorical variables will be summarized by frequencies and percentages. Percentages will  
21 be calculated according to the number of patients for whom data are available. Continuous  
22 variables will be summarized using means  $\pm$  SD or medians and first and third quartiles  
23 (IQR). Basic demographic data for all patients screened will be included.  
24



1  
2  
3 1 *Compliance with the administration of study drug*

4  
5  
6 2 The following compliance with study drug variables will be summarized by treatment group:

- 7  
8 3 ● Cumulative dose of study drugs received (mg or mg equivalent)
- 9  
10 4 ● Overall compliance, defined as the number of doses given divided by the number of
- 11  
12  
13  
14  
15  
16  
17  
18  
19  
20  
21  
22  
23  
24  
25  
26  
27  
28  
29  
30  
31  
32  
33  
34  
35  
36  
37  
38  
39  
40  
41  
42  
43  
44  
45  
46  
47  
48  
49  
50  
51  
52  
53  
54  
55  
56  
57  
58  
59  
60
- 5 expected doses

7 These variables will be presented as mean  $\pm$  SD or median (IQR).

8  
9 *Protocol deviations*

10 Protocol deviations will be summarized by treatment group as the number and proportion

11 of deviations by type. Any withdrawals of consent resulting in permanent discontinuation of

12 study drug will also be summarized in this fashion. Timing of withdrawals will be reported.

13  
14 *Concomitant therapies*

15 The number and proportion of patients receiving open-label thiamine, hydrocortisone, and

16 ascorbic acid during the 4-day study period will be described. Time to first open label use of

17 study drug will be summarized using mean  $\pm$  SD or median (IQR).

18  
19 *Analysis of primary outcome*

20 The primary hypothesis that the combination of ascorbic acid, hydrocortisone, and thiamine

21 will attenuate organ dysfunction in septic shock will be tested by calculating the group

22 difference (intervention vs. placebo) in SOFA score change from baseline to 72 hours using a

23 linear mixed effects model with an appropriate covariance structure. Fixed effects will

24 include age, sex, the allocated treatment, study day (as a categorical variable defined as

1  
2  
3 1 baseline, 24 hours, 48 hours, and 72 hours), and the interaction between treatment and  
4  
5 2 study day. Study site will be included as a random effect. The placebo group is the reference  
6  
7 3 variable for group, and baseline is the reference variable for time. Means and 95%  
8  
9 4 confidence intervals of SOFA score over time will be presented, by treatment, using  
10  
11 5 longitudinal plots.  
12  
13  
14  
15  
16  
17

18 7 If a patient is missing an element of the SOFA score for reasons other than death or early  
19  
20 8 hospital discharge (e.g. laboratory error), we will use the available value in closest temporal  
21  
22 9 proximity. A sensitivity analysis will be performed on the cohort of participants whose SOFA  
23  
24 10 score at 72 hours is available (i.e., not missing due to early mortality, hospital discharged,  
25  
26 11 etc) using linear regression. An additional sensitivity analysis will be conducted with a SOFA  
27  
28 12 score penalty for early death. Specifically, if a participant expires before 72-hours, a 20%  
29  
30 13 increase from their last available SOFA score will be imputed. The increase of 20% was  
31  
32 14 selected by a consensus of the trial steering committee and statisticians. Differential  
33  
34 15 missingness in SOFA score could introduce bias, therefore rates of death and non-death  
35  
36 16 related missingness will be reported by group.  
37  
38  
39  
40  
41  
42

#### 43 18 *Analysis of key secondary outcomes*

44  
45  
46 19 Renal failure: a logistic model controlling for site will be used to compare the incidence of  
47  
48 20 renal failure between the intervention and placebo groups. Results will be reported as odds  
49  
50 21 ratios and 95% confidence intervals.  
51  
52  
53  
54  
55  
56  
57  
58  
59  
60

1 A sensitivity analysis will be performed with the composite outcome defined as receipt of  
2 renal replacement therapy or death while meeting other elements of KDIGO 3 acute renal  
3 failure criteria during the index ICU stay using the method described above.

4  
5 30-day mortality: Kaplan-Meier log-rank test and Cox proportional hazards model  
6 controlling for site will be used to compare the treatment groups in terms of survival. The  
7 outcome variable is 30-day mortality and the predictor is the allocated treatment. If the  
8 proportional hazards assumption is not met, a logistic regression controlling for site will be  
9 performed to obtain odds ratios with 95% confidence intervals.

#### 11 *Analysis of additional secondary outcomes*

12 The following outcomes will be summarized using mean (SD) or median (IQR) and linear  
13 regression controlling for site will be performed to assess the differences between  
14 treatment groups.

- 15 ● Change in individual components of the SOFA score from enrollment to 72 hours
- 16 ● Number of ICU-free days in the first 28 days following enrollment
- 17 ● Number of days free of mechanical ventilation during the first 7 days after enrollment
- 18 ● Number of days free of hemodynamic shock during the first 7 days after enrollment

19  
20 The following outcomes will be summarized using frequencies and percentages and logistic  
21 regression will be performed to assess the differences between treatment groups.

- 22 ● Survival to ICU discharge and survival to hospital discharge
- 23 ● Delirium, as measured by the CAM-ICU, on day 3 of the patient's ICU stay

24

1  
2  
3 1 *Analysis of adverse events*  
4

5 2 Rates of serious expected and unexpected adverse events will be reported by group  
6  
7  
8 3 assignment. Proportions of patients with adverse events will be compared between the  
9  
10 4 treatment groups using Fisher's exact test.  
11  
12

13 5  
14  
15 6 *Analysis of subgroups*  
16

17  
18 7 The analysis will include the following pre-defined subgroup analyses for the primary and  
19  
20 8 key secondary outcomes:  
21

- 22  
23  
24 9 • Grouped by high/low initial severity of illness. High and low levels will be defined by  
25  
26 10 a baseline SOFA score above or below the study median.  
27  
28 11 • Grouped by high/low baseline serum lactate level. High and low levels will be  
29  
30 12 defined by a cut-off at a serum lactate  $\geq 3$ mmol/L. This level was chosen to reflect the  
31  
32 13 population of patients enrolled in our prior pilot randomized trial of thiamine vs.  
33  
34 14 placebo in septic shock.<sup>5</sup>  
35  
36 15 • Grouped by investigator prediction of survival at 30-days. The enrolling provider was  
37  
38 16 asked at the time of enrollment whether they thought it was likely, unclear, or  
39  
40 17 unlikely that the patient would be alive at 30-days.  
41  
42 18 • Grouped by timing of enrollment with respect to vasopressor start time. Timing will  
43  
44 19 be defined by a cut-off of 12-hours. This level was chosen based on a review of the  
45  
46 20 median time to enrollment from the data collected to date.  
47  
48  
49  
50  
51

52  
53  
54 21 The trial is not powered to detect subgroup differences and these will be considered  
55  
56 22 exploratory and hypothesis generating.  
57  
58  
59  
60

1  
2  
3 1 Blood samples will be collected for the measurement of baseline and subsequent levels of  
4  
5 2 thiamine, ascorbic acid, and cortisol. Exploratory analyses based on this testing will not be  
6  
7 3 presented in the primary trial manuscript, but will be described in follow-up manuscripts.  
8  
9

#### 10 4 11 12 13 5 *Missing data*

14  
15 6 If missing data for any key variable (i.e. those used in the primary outcome analysis) are >  
16  
17 7 15%, multiple imputation with chained equations will be performed.  
18  
19

#### 20 8 21 22 23 9 Trial progress

24  
25 10 This manuscript describes the SAP for the ACTS trial. The SAP is published prior to  
26  
27 11 unblinding of the study and provides transparency in decisions with respect to statistical  
28  
29 12 analysis. The ACTS trial has now enrolled more than 75% of its intended with recruitment  
30  
31 13 expected to continue through October 2019. As such, 30-day follow-up will be complete for  
32  
33 14 all patients by the end of November 2019. At the time of this submission, treatment  
34  
35 15 allocations remain blinded.  
36  
37  
38  
39

#### 40 16 41 42 17 **Ethics and Dissemination:**

43  
44 18 The study protocol was approved by the Beth Israel Deaconess Medical Center Committee  
45  
46 19 on Clinical Investigation (protocol 2017P-000436). The Institutional Review Board at each  
47  
48 20 participating site also approved the study protocol. The trial was registered on clinicaltrials.gov  
49  
50 21 (NCT03389555) prior to the enrollment of the first patient. The Food and Drug  
51  
52 22 Administration (FDA) approved an Investigational New Drug (IND) application (IND 136882).  
53  
54 23 Study progress and safety will be monitored by an independent DSMB as described above.  
55  
56 24 Informed, written consent will be obtained prior to enrollment from all participants or their  
57  
58  
59  
60

1  
2  
3 1 legally authorized representatives by trained investigators. A sample informed consent form  
4  
5  
6 2 is included in the supplementary materials. Patients and their legally authorized  
7  
8 3 representatives will be made aware that participation is strictly voluntary and that consent  
9  
10 4 can be withdrawn at any time.  
11  
12

13 5  
14  
15 6 Results of this study will be presented at one or more major scientific conferences and will  
16  
17 7 be published in a peer-reviewed scientific journal. Patient level data will be available to the  
18  
19 8 ACTS trial investigator team and to other academic investigators upon request as  
20  
21 9 adjudicated by the ACTS Steering Committee.  
22  
23  
24  
25  
26  
27  
28  
29  
30  
31  
32  
33  
34  
35  
36  
37  
38  
39  
40  
41  
42  
43  
44  
45  
46  
47  
48  
49  
50  
51  
52  
53  
54  
55  
56  
57  
58  
59  
60

## References

1. Moskowitz A, Andersen LW, Huang DT, et al. Ascorbic acid, corticosteroids, and thiamine in sepsis: a review of the biologic rationale and the present state of clinical evaluation. *Critical Care* 2018; 22(1).
2. Lelubre C, Vincent JL. Mechanisms and treatment of organ failure in sepsis. *Nat Rev Nephrol* 2018;14(7):417-427
3. Brealey D, Brand M, Hargreaves I, et al. Association between mitochondrial dysfunction and severity and outcome of septic shock. *Lancet* 2002;360(9328):219-23
4. Marik PE, Khangoora V, Rivera R, et al. Hydrocortisone, Vitamin C, and Thiamine for the Treatment of Severe Sepsis and Septic Shock: A Retrospective Before-After Study. *Chest* 2017;151(6):1229-1238
5. Donnino MW, Andersen LW, Chase M, et al. Randomized, Double-Blind, Placebo-Controlled Trial of Thiamine as a Metabolic Resuscitator in Septic Shock: A Pilot Study. *Crit Care Med* 2016;44(2):360-7
6. Fowler AA 3rd, Truwit JD, Hite RD, et al. Effect of Vitamin C Infusion on Organ Failure and Biomarkers of Inflammation and Vascular Injury in Patients With Sepsis and Severe Acute Respiratory Failure: The CITRIS-ALI Randomized Clinical Trial. *JAMA* 2019; 322(13):1261-1270
7. ClinicalTrials.gov. <https://clinicaltrials.gov/ct2/show/NCT03389555>. Accessed 09 September 2019
8. Venkatesh B, Finfer S, Cohen J, et al. Adjunctive Glucocorticoid Therapy in Patients with Septic Shock. *N Engl J Med* 2018; 378(9):797-808
9. Annane D, Renault A, Brun-Buisson C, et al. Hydrocortisone plus Fludrocortisone for Adults with Septic Shock. *N Engl J Med*. 2018; 378(9):809-818
10. Pandharipande PP, Shintani AK, Hagerman HE, et al. Derivation and validation of Spo<sub>2</sub>/Fio<sub>2</sub> ratio to impute for Pao<sub>2</sub>/Fio<sub>2</sub> ratio in the respiratory component of the Sequential Organ Failure Assessment score. *Critical care medicine* 2009; 37(4): 1317-132.
11. Ely EW, Inouye SK, Bernard GR, et al. Delirium in mechanically ventilated patients: validity and reliability of the confusion assessment method for the intensive care unit (CAM-ICU). *Jama* 2001; 286(21): 2703-2710.
12. Marik PE, Khangoora V, Rivera R, et al. Hydrocortisone, vitamin c, and thiamine for the treatment of severe sepsis and septic shock: a retrospective before-after study. *Chest* 2017; 151(6): 1229-1238.
13. Rhee C, Dantes R, Epstein L, et al. Incidence and trends of sepsis in US hospitals using clinical vs claims data, 2009-2014. *Jama* 2017; 318(13): 1241-1249.
14. Fergusson D, Aaron SD, Guyatt G, et al. Post-randomisation exclusions: the intention to treat principle and excluding patients from analysis. *BMJ* 2002; 325(7365): 652-654.
15. Kahan BC, Morris TP. Improper analysis of trials randomised using stratified blocks or minimisation. *Stat Med* 2012 Feb 20; 31(4): 328-40.
16. Boutron I, Moher D, Altman DG, et al. Extending the CONSORT statement to randomized trials of nonpharmacologic treatment: explanation and elaboration. *Ann Intern Med* 2008; 148: 295-309.

**Authors' contributions:**

All authors made substantial contributions to the concept and design of the manuscript. Authors TY and AM equally contributed to the initial draft of the manuscript, after which all authors (AM, TY, LWA, DTH, MWD, AVG) provided important intellectual content. All authors read and approved the final manuscript.

**Funding:**

The ACTS trial is supported by a grant from the Open Philanthropy Project. Dr. Moskowitz is supported by a grant from the National Institutes of Health (K23GM128005–01). Dr. Grossestreuer is supported by a KL2/Catalyst Medical Research Investigator Training award (an appointed KL2 award) from Harvard Catalyst |The Harvard Clinical and Translational Science Center (National Center for Research Resources and the National Center for Advancing Translational Sciences, National Institutes of Health Award KL2 TR001100).

**Competing Interests:**

The authors declare no competing interests.

**Acknowledgements:****ACTS Clinical Trial Investigators (listed alphabetically)**

Andersen, Lars W; Becker, Lance B; Berg, Katherine M; Chase, Maureen; Cocchi, Michael N; Donnino, Michael W; Doshi, Pratik; Gong, Jonathan; Grossestreuer, Anne V; Hershey, Mark; Hilewitz, Ayelet; Hou, Peter C; Huang, David T; Kim, Hyung K; Korotun, Maksim; McCannon, Jessica B; Marik, Paul E; Moskowitz, Ari; Sen, Ayan; Sherwin, Robert L; Otero, Ronny; Uduman, Junior

**License Statement**

I, the Submitting Author has the right to grant and does grant on behalf of all authors of the Work (as defined in the below author license), an exclusive license and/or a non-exclusive license for contributions from authors who are: i) UK Crown employees; ii) where BMJ has agreed a CC-BY license shall apply, and/or iii) in accordance with the terms applicable for US Federal Government officers or employees acting as part of their official duties; on a worldwide, perpetual, irrevocable, royalty-free basis to BMJ Publishing Group Ltd ("BMJ") its licensees and where the relevant Journal is co-owned by BMJ to the co-owners of the Journal, to publish the Work in BMJ Open and any other BMJ products and to exploit all rights, as set out in our license.



1  
2  
3  
4  
5  
6  
7  
8  
9  
10  
11  
12  
13  
14  
15  
16  
17  
18  
19  
20  
21  
22  
23  
24  
25  
26  
27  
28  
29  
30  
31  
32  
33  
34  
35  
36  
37  
38  
39  
40  
41  
42  
43  
44  
45  
46  
47  
48  
49  
50  
51  
52  
53  
54  
55  
56  
57  
58  
59  
60

1 **Tables**

2 Table 1: Modified Sequential Organ Failure Assessment Score

3 Table 2: Definitions of secondary outcomes

4 Table 3: Definitions of adverse events and safety outcomes

5 Table 4: Baseline characteristics of patients stratified by treatment group

For peer review only

Table 1: Modified Sequential organ Failure Assessment Score

| Points | SaO <sub>2</sub> */FiO <sub>2</sub> <sup>§</sup>                        | Blood Pressure                                                      | GCS <sup>  </sup> | Bilirubin (mg/dL) | Creatinine (mg/dL)                             | Platelets (x10 <sup>3</sup> µL) |
|--------|-------------------------------------------------------------------------|---------------------------------------------------------------------|-------------------|-------------------|------------------------------------------------|---------------------------------|
| 0      | >399                                                                    | MAP <sup>#</sup> ≥ 70 mmHg                                          | 15                | <1.2              | <1.2                                           | ≥150                            |
| 1      | 316-399                                                                 | MAP < 70 mmHg                                                       | 13–14             | 1.2–1.9           | 1.2 – 1.9                                      | <150                            |
| 2      | 236-315                                                                 | dopamine ≤ 5 µg/kg/min or dobutamine (any dose)                     | 10–12             | 2–5.9             | 2.0 – 3.4                                      | <100                            |
| 3      | 151-235 (and receiving invasive or non-invasive mechanical ventilation) | dopamine > 5 µg/kg/min, epinephrine/norepinephrine ≤ 0.1 µg/kg/min  | 6–9               | 6–11.9            | 3.5 – 4.9<br>Or<br>UOP <sup>†</sup> <500ml/day | <50                             |
| 4      | <151(and receiving invasive or non-invasive mechanical ventilation)     | dopamine > 15 µg/kg/min, epinephrine/norepinephrine > 0.1 µg/kg/min | <6                | ≥12               | ≥5.0<br>UOP <sup>†</sup> <200ml/day            | <20                             |

\*SaO<sub>2</sub>=Oxygen saturation (%); § = Fraction of inspired oxygen (%); || = Glasgow Coma Scale; # = Mean arterial pressure; † = Urine Output

Table 2: Definitions of secondary outcomes

| Variable                                         | DESCRIPTION                                                                                                                                                                                                                                                                                                                                                                                                                                                                                                                                                                                                                                                                                                       |
|--------------------------------------------------|-------------------------------------------------------------------------------------------------------------------------------------------------------------------------------------------------------------------------------------------------------------------------------------------------------------------------------------------------------------------------------------------------------------------------------------------------------------------------------------------------------------------------------------------------------------------------------------------------------------------------------------------------------------------------------------------------------------------|
| 30-day mortality                                 | All-cause mortality over the first 30 days after initial study drug administration.                                                                                                                                                                                                                                                                                                                                                                                                                                                                                                                                                                                                                               |
| KDIGO Stage 3 Renal Injury During Index ICU Stay | <p>Acute renal failure any time during the index ICU stay. Defined as KDIGO stage 3 based on creatinine or urine output:</p> <p>Creatinine criteria: Increase in serum creatinine to more than 300% (&gt; 3-fold) from baseline (or serum creatinine of more than or equal to 4.0 mg/dl with an acute increase of at least 0.5 mg/dl)</p> <p>Urine output criteria: Less than 0.3 ml/kg per hour for 24 hours or anuria for 12 hours or new renal replacement therapy</p>                                                                                                                                                                                                                                         |
| Change in individual SOFA score metrics          | Change in organ specific SOFA scores (i.e. respiratory, coagulation, liver, neurologic, cardiovascular, renal)                                                                                                                                                                                                                                                                                                                                                                                                                                                                                                                                                                                                    |
| Number of ICU-Free Days in the first 28 Days     | <p>Number of days during the first 28 days following study enrollment when the patient was not in the ICU or dead (all days after hospital discharge are considered ICU free).</p> <p>Note: patient would be considered “in the ICU” if they were a patient there for ≥6 hours in the course of a day or if they died prior to 28 days. For example, a patient who died while still in the ICU on day 5 would have 0 ICU-free days. A patient who was discharged from the ICU on day 3 and readmitted on day 7 and discharged again on day 21 would have 10 ICU free days (days 4-6 and 22-28). A patient who was discharged from the ICU on day 3 and did not return to the ICU would have 25 ICU-free days.</p> |
| Survived to ICU discharge                        | Survived to ICU discharge                                                                                                                                                                                                                                                                                                                                                                                                                                                                                                                                                                                                                                                                                         |
| Survived to Hospital discharge                   | Survived to hospital discharge                                                                                                                                                                                                                                                                                                                                                                                                                                                                                                                                                                                                                                                                                    |
| Hospital Disposition                             | Hospital disposition in survivors. Extended care facilities include home with service, rehabilitation center, nursing home, skilled nursing facility/extended care 6, hospice (home or inpatient), and transferred to another acute care facility                                                                                                                                                                                                                                                                                                                                                                                                                                                                 |

|                                                        |                                                                                                                                                                                                                     |
|--------------------------------------------------------|---------------------------------------------------------------------------------------------------------------------------------------------------------------------------------------------------------------------|
| Shock free days                                        | Over the first 7 calendar days after enrollment, number of days in which the patient received <6 hours of any vasopressor agent.                                                                                    |
| Invasive Ventilation Free Days                         | Over the first 7 calendar days after enrollment, number of days in which the patient received <6 hours invasive mechanical ventilation.                                                                             |
| Delirium 72 Hour of ICU Stay (as measured via CAM-ICU) | Delirium on the 3rd day (at approximately 72 hours) after the first study drug dose. Delirium is defined by the Confusion Assessment Method (CAM)-ICU or by the regular CAM if the patient is on the hospital ward. |

For peer review only

Table 3: Definitions of adverse events and safety outcomes

The following definitions will be used:

**Adverse event (AE):** any untoward medical occurrence in a participant to whom a medicinal product is administered and which does not necessarily have a causal relationship with this treatment

**Serious adverse event (SAE):** any untoward medical occurrence that at any dose requires inpatient hospitalization or prolongation of existing hospitalization, results in persistent or significant disability or incapacity, results in a congenital anomaly or birth defect, is life-threatening, or results in death

**Suspected unexpected serious adverse event (SUSAR):** a serious adverse reaction, the nature, severity or outcome of which is not consistent with the reference safety information

| LABEL                  | DESCRIPTION                                                                                                                                                                                                                                                                                                                                                                                                                                                                                                                                                                                                                                                                                                                                                                                                                                                                                      |
|------------------------|--------------------------------------------------------------------------------------------------------------------------------------------------------------------------------------------------------------------------------------------------------------------------------------------------------------------------------------------------------------------------------------------------------------------------------------------------------------------------------------------------------------------------------------------------------------------------------------------------------------------------------------------------------------------------------------------------------------------------------------------------------------------------------------------------------------------------------------------------------------------------------------------------|
| Serious Adverse Events | <p><b>Hyperglycemia:</b> Blood glucose &gt;300mg/dL or new insulin infusion occurring in the first 120-hours after enrollment</p> <p><b>Hyponatremia:</b> Serum sodium (&gt;150 mmol/L) occurring in the first 120-hours after enrollment</p> <p><b>New Infection:</b> As determined by the site principal investigator at each site. Should be a new organism or site of infection and believed to be unrelated to the initial presenting infectious source. Many will have the initiation of new antibiotics or a change in antibiotics.</p> <p><b>Serious allergic reaction:</b> Anaphylaxis or other allergic reaction requiring systemic corticosteroids.</p> <p><b>Renal calculus:</b> Development of a renal calculus between enrollment and 30-day follow-up.</p> <p><b>Others/Unexpected:</b> Any other serious adverse event possibly related to study drug or study participation</p> |
| Related to Study?      | <p><b>Definitely related:</b> no other potential cause of SAE is identified. Investigator certain or near certain the hyperglycemia is related to study drug</p> <p><b>Possibly related:</b> other potential causes of SAE exist. There is at least a 50% chance the hyperglycemia is related to the study drug</p> <p><b>Unlikely related:</b> a clear alternative reason for SAE exists. The investigators believe that there is a &lt;50% chance the SAE is related to study drug</p>                                                                                                                                                                                                                                                                                                                                                                                                         |

1  
2  
3  
4 Other serious  
5 adverse event  
6 severity grading

Grade I: Mild; asymptomatic or mild symptoms; clinical or diagnostic observations only; intervention not indicated

Grade II: Moderate; minimal, local or noninvasive intervention indicated

Grade III: Severe or Medically Significant BUT not Immediately Life-threatening

Grade IV: Life-threatening Consequences; urgent intervention indicated

Grade V: Death Related to Adverse Event

7  
8  
9  
10  
11  
12  
13  
14  
15  
16  
17  
18  
19  
20  
21  
22  
23  
24  
25  
26  
27  
28  
29  
30  
31  
32  
33  
34  
35  
36  
37  
38  
39  
40  
41  
42  
43  
44  
45  
46  
47  
48  
49  
50  
51  
52  
53  
54  
55  
56  
57  
58  
59  
60

For peer review only

Table 4: Baseline characteristics of patients stratified by treatment group

| Characteristics                           | Overall<br>(N = ) | Ascorbic acid,<br>Hydrocortisone,<br>and Thiamine<br>(N = ) | Placebo<br>(N = ) |
|-------------------------------------------|-------------------|-------------------------------------------------------------|-------------------|
| <i>Demographics</i>                       |                   |                                                             |                   |
| Age, yr                                   |                   |                                                             |                   |
| Body mass index, kg/m <sup>2</sup>        |                   |                                                             |                   |
| Female, n (%)                             |                   |                                                             |                   |
| Race, n (%)                               |                   |                                                             |                   |
| African-American                          |                   |                                                             |                   |
| White                                     |                   |                                                             |                   |
| Other                                     |                   |                                                             |                   |
| Past medical history, n (%)               |                   |                                                             |                   |
| None of the below                         |                   |                                                             |                   |
| Coronary artery disease                   |                   |                                                             |                   |
| Cancer                                    |                   |                                                             |                   |
| Congestive heart failure                  |                   |                                                             |                   |
| Chronic obstructive pulmonary disease     |                   |                                                             |                   |
| Dementia/Alzheimer's                      |                   |                                                             |                   |
| Diabetes                                  |                   |                                                             |                   |
| Alcohol use disorder                      |                   |                                                             |                   |
| HIV/AIDS                                  |                   |                                                             |                   |
| Liver disease                             |                   |                                                             |                   |
| Renal disease                             |                   |                                                             |                   |
| Stroke/Transient ischemic attack          |                   |                                                             |                   |
| History of tobacco use                    |                   |                                                             |                   |
| Organ or Bone Marrow Transplant           |                   |                                                             |                   |
| Chronic renal disease stage, n (%)        |                   |                                                             |                   |
| Stage 2                                   |                   |                                                             |                   |
| Stage 3a                                  |                   |                                                             |                   |
| <i>Septic Shock Characteristics</i>       |                   |                                                             |                   |
| Source of sepsis, n (%)                   |                   |                                                             |                   |
| Pneumonia                                 |                   |                                                             |                   |
| Urinary Tract Infection                   |                   |                                                             |                   |
| Intra-Abdominal Infection                 |                   |                                                             |                   |
| Skin or Soft Tissue Infection             |                   |                                                             |                   |
| Vascular Catheter-related Infection       |                   |                                                             |                   |
| Central Nervous System Infection          |                   |                                                             |                   |
| Endocarditis                              |                   |                                                             |                   |
| Infection of Unknown Source               |                   |                                                             |                   |
| Other                                     |                   |                                                             |                   |
| Vasopressors at Time of Study Drug, n (%) |                   |                                                             |                   |
| Norepinephrine                            |                   |                                                             |                   |
| Epinephrine                               |                   |                                                             |                   |
| Phenylephrine                             |                   |                                                             |                   |
| Vasopressin                               |                   |                                                             |                   |

|    |                                                    |  |  |  |
|----|----------------------------------------------------|--|--|--|
| 1  |                                                    |  |  |  |
| 2  |                                                    |  |  |  |
| 3  | Dopamine                                           |  |  |  |
| 4  | Dobutamine                                         |  |  |  |
| 5  | Angiotensin                                        |  |  |  |
| 6  | Milrinone                                          |  |  |  |
| 7  | Midodrine                                          |  |  |  |
| 8  |                                                    |  |  |  |
| 9  | Mechanical ventilation, n (%)                      |  |  |  |
| 10 | Volume of IV fluids <sup>a</sup> , ml              |  |  |  |
| 11 | <i>Baseline vital signs</i>                        |  |  |  |
| 12 |                                                    |  |  |  |
| 13 | Temperature, Celsius                               |  |  |  |
| 14 | Heart rate, beats/minute                           |  |  |  |
| 15 | Systolic blood pressure, mmHg                      |  |  |  |
| 16 | Diastolic blood pressure, mmHg                     |  |  |  |
| 17 | Respiratory rate, inspirations/minute              |  |  |  |
| 18 | Lactate, mmol/L                                    |  |  |  |
| 19 | WBC x10 <sup>9</sup>                               |  |  |  |
| 20 | Creatinine, mg/dL                                  |  |  |  |
| 21 |                                                    |  |  |  |
| 22 | <i>ICU physician prediction<sup>b</sup></i>        |  |  |  |
| 23 |                                                    |  |  |  |
| 24 | Predicted survival at 30 days <sup>b</sup> , n (%) |  |  |  |
| 25 | Very likely                                        |  |  |  |
| 26 | Uncertain                                          |  |  |  |
| 27 | Very unlikely                                      |  |  |  |
| 28 |                                                    |  |  |  |
| 29 | <i>SOFA score</i>                                  |  |  |  |
| 30 | Baseline SOFA score                                |  |  |  |

- 31 a. Volume of IV fluids received in the 12-hours preceding enrollment
- 32 b. At time of enrollment, the physician enrolling the patient is asked to predict 30-day survival.
- 33
- 34
- 35
- 36
- 37
- 38
- 39
- 40
- 41
- 42
- 43
- 44
- 45
- 46
- 47
- 48
- 49
- 50
- 51
- 52
- 53
- 54
- 55
- 56
- 57
- 58
- 59
- 60



1  
2  
3  
4  
5  
6  
7  
8  
9  
10  
11  
12  
13  
14  
15  
16  
17  
18  
19  
20  
21  
22  
23  
24  
25  
26  
27  
28  
29  
30  
31  
32  
33  
34  
35  
36  
37  
38  
39  
40  
41  
42  
43  
44  
45  
46  
47  
48  
49  
50  
51  
52  
53  
54  
55  
56  
57  
58  
59  
60

For peer review only

\*\*FOR CCI USE ONLY\*\*

**Approved by the Beth Israel Deaconess Medical Center  
Committee on Clinical Investigations:**

**Consent Approval Date:** 9/10/18

**Protocol Number:** 2017P-000436

BETH ISRAEL DEACONESS  
APPROVED BY THE  
COMMITTEE ON CLINICAL INVESTIGATIONS  
09/09/2019  
APPROVAL EXPIRATION DATE  
MEDICAL CENTER

## INFORMED CONSENT FORM TO TAKE PART IN A RESEARCH STUDY

|                                                                                                 |
|-------------------------------------------------------------------------------------------------|
| <b>SUBJECT'S NAME:</b>                                                                          |
| <b>TITLE OF RESEARCH PROTOCOL: Vitamin C, Steroids, and Thiamine in Sepsis and Septic Shock</b> |
| <b>PRINCIPAL INVESTIGATOR: Michael Donnino, MD (BIDMC)</b>                                      |
| <b>SITE PRINCIPAL INVESTIGATOR: PETER HOU MD (BWH)</b>                                          |
| <b>PROTOCOL NUMBER: 2017P-000436</b>                                                            |

### INTRODUCTION:

- This is a research study;
- Your participation is voluntary;
- A research study includes only people who choose to take part;
- You may or may not benefit from participating in the study. However, your participation may help others in the future as a result of knowledge gained from the research;
- You may leave the study at any time;
- If you choose not to take part, or if you leave the study, your decision will in no way harm your relationship with any member of the research team or any other individuals at Beth Israel Deaconess Medical Center (BIDMC) or Brigham and Women's Hospital (BWH).

Please read this consent form carefully and ask the investigators or study staff to explain any words or information that you do not clearly understand. Once you read this consent form and understand what your participation in this study will involve, you will be asked to sign this form if you wish to take part. You will be given a signed copy of the form to keep for your records. Please keep your copy for your records. It has information, including important names and telephone numbers, for future reference.

### DISCLOSURE OF SPECIAL INTERESTS OF BIDMC [Beth Israel Deaconess Medical Center], BWH [Brigham and Women's Hospital] AND INVESTIGATORS

This study is being conducted by Dr. Michael Donnino and Dr. Peter Hou. This study is funded by the Good Ventures Foundation (Open Philanthropy Project). The funding agency in this study, Good Ventures Foundation (Open Philanthropy Project), is paying Beth Israel Deaconess Medical Center to perform this research. Beth Israel Deaconess Medical Center, Brigham and Women's Hospital, Dr. Donnino, and Dr. Hou have no additional interests in this research project.

### WHOM TO CONTACT IF YOU HAVE QUESTIONS OR PROBLEMS

If you are signing this consent at BIDMC and have any questions, concerns or complaints about this

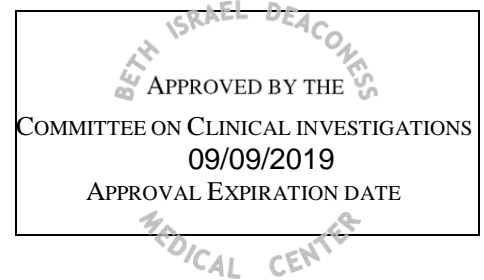

SUBJECT'S NAME:

TITLE OF RESEARCH PROTOCOL: VITAMIN C, STEROIDS, AND THIAMINE IN SEPSIS AND SEPTIC SHOCK

PRINCIPAL INVESTIGATOR'S NAME: MICHAEL DONNINO, MD (BIDMC) AND PETER HOU, MD (BWH)

PROTOCOL #: 2017P-000436

research or experience any problems, you should contact Dr. Donnino at [617] 754-2341. You can also call the ED Research Team at [617] 754-2882 with questions about this research study.

If you are signing this consent at Brigham and Women's Hospital, please contact Peter Hou, MD at (617) 732-6062, Monday – Friday 9 am-5 pm or he can be reached 24/7 via the hospital page operator by dialing (617) 732-5500 and ask to have him paged.

## PURPOSE

We are conducting this study to see the effects of Vitamin C, Hydrocortisone and Thiamine administered together on organ injury in people with severe infections. We want to determine if these drugs administered together will be helpful for people with severe infections.

Vitamin C and Vitamin B1 (also called Thiamine) are vitamins which are essential for the function of the cells in your body. Without adequate Vitamin C and Thiamine, certain aspects of energy production would not take place properly. Hydrocortisone is a corticosteroid (a naturally occurring compound in your body) that is commonly used for the treatment of patients with low blood pressure caused by severe infections.

Recent studies have shown that patients with serious infections often have low levels of Thiamine and Vitamin C in their body. In addition, there is some evidence that giving Thiamine to animals with septic shock improves energy production, even in those who are not deficient. Further there is evidence that Vitamin C administered together with Hydrocortisone and Thiamine may improve survival in patients with severe infection.

## STUDY PARTICIPANTS

You have been asked to be in the study because you have a serious infection, called Sepsis. Sepsis is a severe infection that causes low blood pressure and critical illness. This is a very serious condition that even with treatment can lead to organ dysfunction and even death.

Approximately 60 people will take part in this study at Beth Israel Deaconess Medical Center and 20 will participate at Brigham and Women's Hospital. A total of 200 people will take part in this study at all study sites.

## DESCRIPTION OF STUDY DETAILS

If you agree to be in this study, you will be asked to read and sign this consent form. After you sign the consent form, the following things will happen:

1. **Screening Procedures:** Screening procedures are tests and procedures that will be done to determine if you are eligible to take part in the research study. For this research study, the

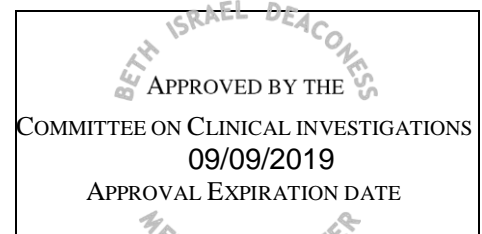

|                                                                                          |
|------------------------------------------------------------------------------------------|
| SUBJECT'S NAME:                                                                          |
| TITLE OF RESEARCH PROTOCOL: VITAMIN C, STEROIDS, AND THIAMINE IN SEPSIS AND SEPTIC SHOCK |
| PRINCIPAL INVESTIGATOR'S NAME: MICHAEL DONNINO, MD (BIDMC) AND PETER HOU, MD (BWH)       |
| PROTOCOL #: 2017P-000436                                                                 |

screening procedure will be a review of your medical record to see if you qualify for the study.

If you are a female aged <45 years, we will ensure that you have had a negative blood or urine pregnancy test performed as part of your care. This will generally be done as part of usual care.

2. **Randomization Procedures:** You will be randomly assigned (like the flip of a coin) to receive either Vitamin C, Hydrocortisone, and Thiamine or a Placebo. You have a 1 in 2 chance of receiving either the drugs or the placebo. You will not be able to choose the study group to which you will be assigned.

If one treatment arm is found to be less effective than the other while you are taking part in the study, you will be informed and further treatment will be discussed.

Depending upon the group to which you are assigned, you may receive a placebo instead of the study drugs. A placebo is an inactive substance that looks like the study drug, but a placebo contains no active medication. Placebos are used to help determine if the results of the study are truly from the study drug. The placebo used in this study will be an intravenous (IV) infusion of 0.9% Sodium Chloride. This is a solution of sodium chloride in water (salt water). You will not know whether you will be receiving the study drug or the placebo. However, this information can be learned in case of an emergency.

3. **Research Procedures:** Your chart will be reviewed to assure that you are appropriate for inclusion in the study. If you qualify to take part in this research study and you choose to participate you will undergo these research procedures:
- A blood draw right after you sign the consent to examine chemicals in your blood which tell us something about how it is responding to an infection. We will draw no more than 30 milliliters/2 tablespoons of blood (depending on how much blood is available from clinical blood draws).
  - You will be assigned to one of the following groups:
    - **Vitamin C, Hydrocortisone, and Thiamine group:** If you are assigned to the Vitamin C, Hydrocortisone, and Thiamine group you will receive 4 daily doses of 1.5 grams of Vitamin C, 100 milligrams of Thiamine and 50 milligrams of Hydrocortisone. Vitamin C and Thiamine will be administered intravenously (i.e: into your veins) every 6 hours for a total of 4 days or until discharge from the ICU. Similarly, Hydrocortisone will be administered intravenously for up to 4 days or until you are discharged from the ICU (whatever happens first).

|                                                                                          |
|------------------------------------------------------------------------------------------|
| SUBJECT'S NAME:                                                                          |
| TITLE OF RESEARCH PROTOCOL: VITAMIN C, STEROIDS, AND THIAMINE IN SEPSIS AND SEPTIC SHOCK |
| PRINCIPAL INVESTIGATOR'S NAME: MICHAEL DONNINO, MD (BIDMC) AND PETER HOU, MD (BWH)       |
| PROTOCOL #: 2017P-000436                                                                 |

|                                                                                                                                                                                          |
|------------------------------------------------------------------------------------------------------------------------------------------------------------------------------------------|
| 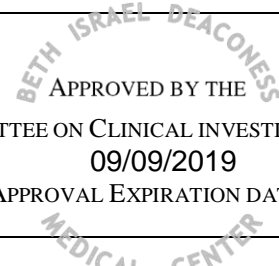<br>APPROVED BY THE<br>COMMITTEE ON CLINICAL INVESTIGATIONS<br>09/09/2019<br>APPROVAL EXPIRATION DATE |
|------------------------------------------------------------------------------------------------------------------------------------------------------------------------------------------|

- **Placebo group:** If you are assigned to the placebo group you will receive 4 daily doses of 0.9% Sodium Chloride for up to 4 days or until discharge from the ICU (whatever happens first).
- Blood samples will be drawn at enrollment (0 hours), 24 hours, 72 hours, and 120 hours for a maximum total of 240 milliliters (no more than 16 tablespoons total). Portions of your blood collected for research will be used to:
  - Clinical laboratory tests, analysis of cells (how your organs are working), serum, and plasma (parts of your blood). Some of these exams, tests may be done as part of regular care; if so, they may not need to be repeated; this decision will be up to your study doctor.
  - Freeze and store any leftover blood for possible analysis in the future of proteins in your blood called biomarkers that increase and decrease when your body is under stress. This extra blood will be stored at BIDMC and may be kept for up to 10 years. Access to these samples will be limited to the investigator and collaborators. If at any point you choose to withdraw your consent, you may contact Dr. Donnino (BIDMC) or Dr. Hou (BWH) and these samples will be disposed of and will not be used for future research. Genetic testing will not be performed.
- Urine will be collected at enrollment (0 hours), 24 hours, and 72 hours for a maximum total of 30 milliliters. We will study the characteristics of your urine to better understand how your kidneys are functioning. Additional urine will be frozen and stored for possible analysis in the future of proteins in your urine called biomarkers that increase and decrease when your body is under stress. This urine may be stored for up to 10 years and access to these samples will be limited to the investigator and collaborators. If at any point you choose to withdraw your consent, you may contact Dr. Donnino (BIDMC) or Dr. Hou (BWH) and these samples will be disposed of and will not be used for future research. Genetic testing will not be performed.
- Assessment of organ support, which includes, for example, medications to maintain blood pressure, will be performed everyday while you are in the hospital.
- We will also perform a more thorough review of your chart to see how you are doing while you are in the hospital. Information regarding your progress and treatments will be reviewed by the research team. We will collect and record vital signs, laboratory results, treatments you may have received and any other tests done as part of your care. If you were not in this study, we would not be reviewing your medical record.



|                                                                                          |
|------------------------------------------------------------------------------------------|
| SUBJECT'S NAME:                                                                          |
| TITLE OF RESEARCH PROTOCOL: VITAMIN C, STEROIDS, AND THIAMINE IN SEPSIS AND SEPTIC SHOCK |
| PRINCIPAL INVESTIGATOR'S NAME: MICHAEL DONNINO, MD (BIDMC) AND PETER HOU, MD (BWH)       |
| PROTOCOL #: 2017P-000436                                                                 |

- If you have been discharged from the hospital, you will receive a telephone call at 30-days after enrollment and 90-days after enrollment to see how you are doing after your hospitalization. If we are unable to reach you after two attempts, you may receive a follow-up letter.

4. Monitoring/Follow-Up Procedures. Procedures performed to evaluate the effectiveness and safety of the research procedures are called “monitoring” or “follow-up” procedures. For this research study, the monitoring/follow-up procedures include:

- At each of the blood draws (0 hours, 24 hours, 72 hours, 120 hours) we will follow along in your chart and record lab results from your routine care. When you are discharged, we will record information about your length of stay and signs of organ failure during your hospital stay.
- If you have been discharged from the hospital, you will receive a telephone call at 30-days after enrollment and 90-days after enrollment to see how you are doing after your hospitalization. If we are unable to reach you after two attempts, you may receive a follow-up letter.

**For BWH site:** Blood samples and data, with your name and identifying information removed by study staff will be sent to BIDMC analysis center. The BIDMC analysis center will not receive any protected health information.

## RISKS AND DISCOMFORTS

As a result of your participation in this study, you are at risk for side effects listed in this section. You should discuss these with the investigator and with your regular doctor if you choose.

### Blood Draw Risk:

The risks associated with venipuncture (for blood draws) include momentary pain during needle insertion and bruising at the site of needle insertion. Infection, excess bleeding, clotting, and fainting also are possible, though unlikely. However, it is very likely that you will have an intravenous line from which we may draw, and so the blood draw will be painless. There is a very small risk that air or microorganisms may be introduced in your blood stream, but many steps will be taken to keep this risk at an absolute minimum.

### Thiamine Risk:

The only known side effect from Thiamine is the potential for an allergic reaction. Allergic reactions (anaphylaxis) from Thiamine, in general, are very rare. The chance of a serious allergic reaction from Thiamine is approximately 1 in 250,000. There may be a risk of feeling burning at the site of the administration of the study drug.

1  
2  
3  
SUBJECT'S NAME:4  
5  
6  
TITLE OF RESEARCH PROTOCOL: VITAMIN C, STEROIDS, AND THIAMINE IN  
SEPSIS AND SEPTIC SHOCK7  
8  
9  
PRINCIPAL INVESTIGATOR'S NAME: MICHAEL DONNINO, MD (BIDMC)  
AND PETER HOU, MD (BWH)10  
11  
12  
PROTOCOL #: 2017P-00043613  
14  
15  
16  
17  
18  
19  
20  
**Vitamin C Risk:**

In high doses Vitamin C can increase the excretion of oxalate (a chemical substance) in your urine, which, in some cases, raises the risk of kidney stone formation. To prevent this from happening, individuals with a history of kidney stones within the past year will not participate in the study. There is also a chance you will feel dizzy and a rare chance of diarrhea and bloating. Allergic reactions (anaphylaxis) in general, are very rare.

21  
22  
23  
24  
25  
26  
27  
28  
29  
30  
31  
**Hydrocortisone Risk:**

Multiple studies with the same dosages of steroids in severe infections over a short time course (similar to this study) have been performed and Hydrocortisone is a standard part of care for many patients with severe infections. Hydrocortisone may increase your risk of additional infections, higher blood sugars, higher levels of sodium, bleeding of the digestive tract and muscle weakness (although these effects have not been clearly seen in patients receiving Hydrocortisone for sepsis). In pregnancy, Hydrocortisone may increase the risk of cleft palate and there are concerns about the effects of Hydrocortisone on fetal growth and the adrenal gland function. If you are pregnant, you should not participate in this study.

32  
33  
34  
35  
36  
37  
**LOSS OF CONFIDENTIALITY**

There is the potential for loss of confidentiality by participating in this study. Every effort will be made to protect the confidentiality of your identifiable information.

38  
39  
40  
41  
42  
43  
44  
45  
46  
47  
48  
49  
50  
**CONFIDENTIALITY**

Information learned from your participation in this study and from your medical record may be reviewed and photocopied by the Food and Drug Administration (FDA) and/or other federal and state regulatory agencies, accreditation agencies, the Committee on Clinical Investigations, the Human Subjects Protection Office and others involved in research administration of the Beth Israel Deaconess Medical Center and Brigham and Women's Hospital with protection of confidentiality so far as permitted by applicable law. Information resulting from this study and from your medical record may be used for research purposes and may be published; however, you will not be identified by name in such publications.

51  
52  
53  
54  
55  
56  
57  
58  
59  
60  
**MEDICAL RECORD**

A copy of this consent form and information collected during this research may become part of your medical record, if the information is relevant to the care you receive at Beth Israel Deaconess Medical Center. Medical records are considered permanent records; therefore, information cannot be deleted from the record. Medical records are available to health care professionals at Beth Israel



|                                                                                          |
|------------------------------------------------------------------------------------------|
| SUBJECT'S NAME:                                                                          |
| TITLE OF RESEARCH PROTOCOL: VITAMIN C, STEROIDS, AND THIAMINE IN SEPSIS AND SEPTIC SHOCK |
| PRINCIPAL INVESTIGATOR'S NAME: MICHAEL DONNINO, MD (BIDMC) AND PETER HOU, MD (BWH)       |
| PROTOCOL #: 2017P-000436                                                                 |

Deaconess Medical Center and may be reviewed by staff when carrying out their responsibilities, as well as by external parties such as health care insurers and others in certain circumstances. If you are not currently a patient at Beth Israel Deaconess Medical Center and do not have a medical record at Beth Israel Deaconess Medical Center, one may be created for you for your participation in this research. You may also be required to register as a patient of Beth Israel Deaconess Medical Center in order to participate in this research.

## POSSIBLE BENEFITS

It is not possible to predict whether you will benefit directly from participation in this study. However, your participation may help others in the future as a result of knowledge gained from the research.

## OTHER AVAILABLE OPTIONS

Taking part in this study is voluntary. If you choose not to participate in this study, you will continue to receive clinical care from your ICU team as you have been.

It is important to note that it is possible to get Thiamine even if you do not take part in the study. Thiamine and Vitamin C have not been approved by the FDA for treatment of your condition; however, many doctors in the community commonly prescribe these drugs to treat vitamin deficiencies. Please be aware that not all doctors may agree to prescribe this drug for you, and that not all health insurance companies will pay for the drug when it is prescribed by your treating physician for sepsis (although will be provided free of charge to you if given as part of this study).

It is important to note that it is possible to get Hydrocortisone even if you do not take part in this study. Hydrocortisone has been approved by the FDA for treatment of your condition and is already used in certain clinical scenarios in patients with septic shock.

We recommend that you discuss these and other options with the investigator and your regular doctor so that you can make a well-informed decision about participating in this study.

## IF YOU DECIDE NOT TO TAKE PART IN THE STUDY

Participation in this study is voluntary. You have the right to decide not to take part in this study. If you choose to participate, you have the right to leave the study at any time. Your decision to not participate will not result in any penalties or loss of benefits to you. The investigators will tell you about new information that may affect your willingness to stay in this study.

If you decide not to participate in the study or decide to leave the study early, your decision will not affect your relationship with the research team or any other individual at Beth Israel Deaconess



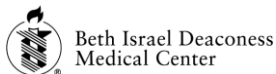1  
2  
3 SUBJECT'S NAME:4 TITLE OF RESEARCH PROTOCOL: VITAMIN C, STEROIDS, AND THIAMINE IN  
5 SEPSIS AND SEPTIC SHOCK6 PRINCIPAL INVESTIGATOR'S NAME: MICHAEL DONNINO, MD (BIDMC)  
7 AND PETER HOU, MD (BWH)8 PROTOCOL #: 2017P-000436  
910  
11 Medical Center or Brigham and Women's Hospital.12  
13  
14 **INVESTIGATORS RIGHT TO STOP THE STUDY**15 The investigators have the right to end your participation in this study if they determine that you no  
16 longer qualify to take part, or if it would be dangerous for you to continue, or if you do not follow  
17 study procedures as directed by the investigators. Beth Israel Deaconess Medical Center, Brigham  
18 and Women's Hospital or the funding source may stop the study at any time.  
19  
2021  
22 **COSTS AND/OR PAYMENTS TO YOU**23  
24 **COSTS COVERED BY STUDY**25 You will not be charged for the study drugs (Steroids, Vitamin C, Thiamine, Sodium Chloride) or  
26 blood tests that are part of this research study. However, you and your insurance company will be  
27 charged for other tests, procedures or medications of this study that are considered standard  
28 treatment for your medical condition.  
29  
3031 **Co-PAYMENT/DEDUCTIBLE STATEMENT**32 You will be responsible for any co-payments or deductibles that are standard for your insurance  
33 coverage.  
3435 **PAYMENTS TO YOU:**36 There is no payment to you for participating in this study.  
37  
3839 **COST OF RESEARCH RELATED INJURY:**40 If you are injured as a direct result of your participation in this study you should contact the  
41 Investigator at the number provided under the section "Whom to Call if You Have Questions" in this  
42 form. You will be offered the necessary care to treat your injury. You or your insurance company  
43 will be billed for medical care and/or hospitalization related to this injury. You will be responsible for  
44 all co-payments and deductibles required under your insurance. BIDMC will consider  
45 reimbursement of injury related expenses not covered by your insurance on a case-by-case basis.  
46 At this time there is no plan to reimburse you for items such as lost wages or lost time from work.  
47 By signing this consent form you have not given up any legal rights.  
48  
4950  
51 **OTHER IMPORTANT INFORMATION**52 A description of this clinical trial will be available on [www.ClinicalTrials.gov](http://www.ClinicalTrials.gov) as required by U.S. law.  
53 This Web site will not include information that can identify you. At most, the Web site will include a  
54 summary of the results. You can search this Web site at any time.  
55  
5657 **AUTHORIZATION FOR USE AND DISCLOSURE OF YOUR PROTECTED HEALTH**58 *Informed Consent – Part D*59 *CCI Form: 6-2017*



|                                                                                          |
|------------------------------------------------------------------------------------------|
| SUBJECT'S NAME:                                                                          |
| TITLE OF RESEARCH PROTOCOL: VITAMIN C, STEROIDS, AND THIAMINE IN SEPSIS AND SEPTIC SHOCK |
| PRINCIPAL INVESTIGATOR'S NAME: MICHAEL DONNINO, MD (BIDMC) AND PETER HOU, MD (BWH)       |
| PROTOCOL #: 2017P-000436                                                                 |

## INFORMATION

As part of this study, we will be collecting, using and sharing with others information about you. Please review this section carefully as it contains information about the federal privacy rules and the use and disclosure of your information.

### PROTECTED HEALTH INFORMATION [PHI]

By signing this informed consent document, you are allowing the investigators and other authorized personnel to use [internally at BIDMC, BIDMC] and disclose [to people and organizations outside the BIDMC and BWH workforce identified in this consent] health information about you. This may include information about you that already exists (for example: your medical records and other sources of health information, demographic information and the results of any laboratory tests as well as any new information generated as part of this study. This is your Protected Health Information.

### PEOPLE/GROUPS AT BIDMC AND BWH WHO WILL SHARE AND USE YOUR PROTECTED HEALTH INFORMATION

Your Protected Health Information may be shared with and used by investigators working on this study, including the supporting research team (such as research assistants and coordinators, statisticians, data managers, laboratory personnel, pharmacy personnel, and administrative assistants), and may also be shared and used by other health care providers at BIDMC and BWH who have treated you in the past and have information relevant to the research, or who provide services to you in connection with the research. Your Protected Health Information may also be shared with the members and staff of the Committee on Clinical Investigations of Beth Israel Deaconess Medical Center or the Partners Human Research Committee at Brigham and Women's Hospital, which are responsible for reviewing studies for the protection of the research subjects.

### PEOPLE/GROUPS OUTSIDE OF BIDMC AND BWH WITH WHOM YOUR PROTECTED HEALTH INFORMATION WILL BE SHARED

We will take care to maintain confidentiality and privacy about you and your Protected Health Information. We may share your Protected Health Information with the following groups so that they may carry out their duties related to this study:

- Other researchers and medical centers that are part of this study.
- People from organizations that provide independent accreditation and oversight of hospitals and research.
- Statisticians and other data monitors not affiliated with BIDMC or Partners.
- The members and staff of any other IRBs (beyond the BIDMC Committee on Clinical Investigations) that oversee the research
- Centralized data collectors
- Your health insurance company



|                                                                                          |
|------------------------------------------------------------------------------------------|
| SUBJECT'S NAME:                                                                          |
| TITLE OF RESEARCH PROTOCOL: VITAMIN C, STEROIDS, AND THIAMINE IN SEPSIS AND SEPTIC SHOCK |
| PRINCIPAL INVESTIGATOR'S NAME: MICHAEL DONNINO, MD (BIDMC) AND PETER HOU, MD (BWH)       |
| PROTOCOL #: 2017P-000436                                                                 |

- The Food and Drug Administration [FDA], the Department of Health and Human Services [DHHS], the National Institute of Health [NIH], the Office for Human Research Protections [OHRP], and other federal and state agencies that may have jurisdiction over the research
- Hospital and Clinical Research Accrediting Agencies
- Data and Safety Monitoring boards that oversee this study

Those who receive your Protected Health Information during the course of the research may not be required by the federal privacy regulations to protect it, and they may make further disclosures to others and use your information without being subject to penalties under those laws.

#### WHY WE ARE USING AND SHARING YOUR PROTECTED HEALTH INFORMATION

The main reason for using and sharing your Protected Health Information is to conduct and oversee the research as described in this Informed Consent Document. There are many other reasons beyond the research for which BIDMC and BWH may use or disclose your Protected Health Information. Not all of these reasons require your express written authorization. For example, we will use and share your Protected Health Information to ensure that the research meets legal, institutional and accreditation requirements and to conduct public health activities. The various ways in which BIDMC and BWH may use and disclose your protected health information without your authorization are explained in a document called the Notice of Privacy Practices. If you have not received a copy of BIDMC's and BWH's Notice of Privacy Practices, please ask us for one and review it before signing this form. In addition to signing this document, you may also be asked to sign a BIDMC and BWH General Agreement form acknowledging that you have received the BIDMC Notice of Privacy Practices.

#### NO EXPIRATION DATE – RIGHT TO WITHDRAW AUTHORIZATION

Your authorization for the use and disclosure of your Protected Health Information in this Study shall never expire. However, you may withdraw your authorization for the use and disclosure of your Protected Health Information at any time provided you notify the Principal Investigator in writing. If you would like to take back your authorization so that your Protected Health Information can no longer be used in this study, please send a letter notifying the Principal Investigator of your withdrawal of your authorization to:

BIDMC: Dr. Michael Donnino at 330 Brookline Ave., Boston, MA 02215.

BWH: Dr. Peter Hou at Neville House 312C, 75 Francis Street, Boston, MA 02115

Please be aware that the investigators in this study will not be required to destroy or retrieve any of your Protected Health Information that has already been used or disclosed before the Principal Investigator receives your letter, and they are permitted to continue to use and disclose your previously collected information as necessary to complete the research.



|                                                                                          |
|------------------------------------------------------------------------------------------|
| SUBJECT'S NAME:                                                                          |
| TITLE OF RESEARCH PROTOCOL: VITAMIN C, STEROIDS, AND THIAMINE IN SEPSIS AND SEPTIC SHOCK |
| PRINCIPAL INVESTIGATOR'S NAME: MICHAEL DONNINO, MD (BIDMC) AND PETER HOU, MD (BWH)       |
| PROTOCOL #: 2017P-000436                                                                 |

### REFUSAL TO SIGN

Your clinical treatment may not be conditioned upon whether you sign the Authorization for Research. However, if you choose not to sign this informed consent document and authorization for the use and disclosure of your Protected Health Information, you will not be allowed to take part in the research study.

### RIGHT TO ACCESS AND COPY YOUR PHI

If you wish to review or copy your Protected Health Information as it is made part of your medical record, you may do so after the completion or termination of the study by sending a letter to the Principal Investigator requesting a copy of your Protected Health Information. You may not be allowed to inspect or copy your Protected Health Information until this study is completed or terminated.

### ADDITIONAL CONTACT FOR QUESTIONS OR CONCERNS

**BIDMC:** You may contact the Human Subjects Protection Office at [617] 975-8500 in the event that you would like to obtain information or to offer input about the research study. This office is independent of the investigator or investigator's research staff and can also assist with questions relating to your rights as a participant in research, which may include questions, concerns or complaints about your participation in the study.

**BWH:** If you want to speak with someone **not** directly involved in this research study, please contact the Partners Human Research Committee office. You can call them at [857] 282-1900. You can talk to them about:

- Your rights as a research subject
- Your concerns about the research
- A complaint about the research

Also, if you feel pressured to take part in this research study, or to continue with it, they want to know and can help.

### ICF REVISION DATES:

10/23/17, 2/2/18, 02/16/18, 06/14/18, 08/07/18, 08/10/18







|                                                                                          |
|------------------------------------------------------------------------------------------|
| SUBJECT'S NAME:                                                                          |
| TITLE OF RESEARCH PROTOCOL: VITAMIN C, STEROIDS, AND THIAMINE IN SEPSIS AND SEPTIC SHOCK |
| PRINCIPAL INVESTIGATOR'S NAME: MICHAEL DONNINO, MD (BIDMC) AND PETER HOU, MD (BWH)       |
| PROTOCOL #: 2017P-000436                                                                 |

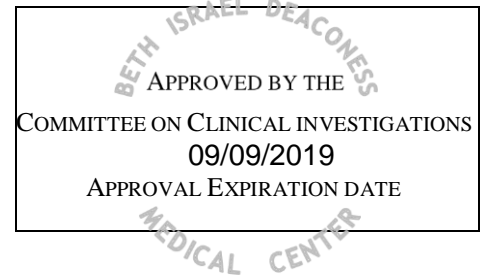

**THE FOLLOWING SECTIONS ARE NOT NEEDED FOR ALL STUDIES AND SHOULD BE UTILIZED AS INDICATED:**

**If the subject is able to speak and understand English but is not able to read or write**

I was present during the entire oral presentation of the informed consent and witnessed the subject's agreement to participate in the study.

Signature of Witness: \_\_\_\_\_

Printed Name of Witness: \_\_\_\_\_

Date: \_\_\_\_\_

**If the subject is able to understand English but is not physically able to read or write or see**

I was present during the entire oral presentation of the informed consent and witnessed the subject's agreement to participate in the study.

Signature of Witness: \_\_\_\_\_

Printed Name of Witness: \_\_\_\_\_

Date: \_\_\_\_\_

**If the subject is not English speaking and signed the translated Short Form in lieu of the English consent document.**

As someone who understands both English and the language spoken by the subject, I interpreted, in the subject's language, the researcher's presentation of the English consent form. The subject was given the opportunity to ask questions.

Signature of Interpreter: \_\_\_\_\_

Printed name of Interpreter: \_\_\_\_\_

Date: \_\_\_\_\_

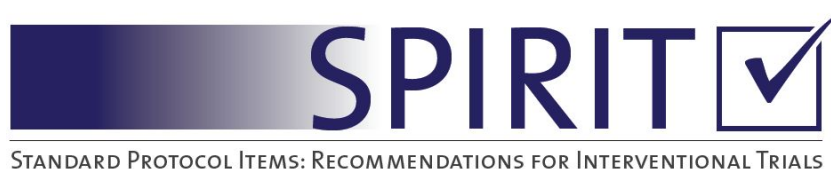

STANDARD PROTOCOL ITEMS: RECOMMENDATIONS FOR INTERVENTIONAL TRIALS

## Ascorbic acid, Corticosteroids, and Thiamine in Sepsis (ACTS) Clinical Trial: SPIRIT 2013 Checklist

| Section/item                      | Item No | Description                                                                                                                                                                                                                                                                              | Page Number on which item is reported |
|-----------------------------------|---------|------------------------------------------------------------------------------------------------------------------------------------------------------------------------------------------------------------------------------------------------------------------------------------------|---------------------------------------|
| <b>Administrative information</b> |         |                                                                                                                                                                                                                                                                                          |                                       |
| Title                             | 1       | Descriptive title identifying the study design, population, interventions, and, if applicable, trial acronym                                                                                                                                                                             | 1                                     |
| Trial registration                | 2a      | Trial identifier and registry name. If not yet registered, name of intended registry                                                                                                                                                                                                     | 2                                     |
|                                   | 2b      | All items from the World Health Organization Trial Registration Data Set                                                                                                                                                                                                                 | 2                                     |
| Protocol version                  | 3       | Date and version identifier                                                                                                                                                                                                                                                              | See referenced full protocol          |
| Funding                           | 4       | Sources and types of financial, material, and other support                                                                                                                                                                                                                              | 18                                    |
| Roles and responsibilities        | 5a      | Names, affiliations, and roles of protocol contributors                                                                                                                                                                                                                                  | 1, 18                                 |
|                                   | 5b      | Name and contact information for the trial sponsor                                                                                                                                                                                                                                       | 18                                    |
|                                   | 5c      | Role of study sponsor and funders, if any, in study design; collection, management, analysis, and interpretation of data; writing of the report; and the decision to submit the report for publication, including whether they will have ultimate authority over any of these activities | 18                                    |
|                                   | 5d      | Composition, roles, and responsibilities of the coordinating centre, steering committee, endpoint adjudication committee, data management team, and other individuals or groups overseeing the trial, if applicable (see Item 21a for data monitoring committee)                         | See referenced full protocol          |
| <b>Introduction</b>               |         |                                                                                                                                                                                                                                                                                          |                                       |



|                                                           |     |                                                                                                                                                                                                                                                                                                                                                                                |                              |
|-----------------------------------------------------------|-----|--------------------------------------------------------------------------------------------------------------------------------------------------------------------------------------------------------------------------------------------------------------------------------------------------------------------------------------------------------------------------------|------------------------------|
| Background and rationale                                  | 6a  | Description of research question and justification for undertaking the trial, including summary of relevant studies (published and unpublished) examining benefits and harms for each intervention                                                                                                                                                                             | 4                            |
|                                                           | 6b  | Explanation for choice of comparators                                                                                                                                                                                                                                                                                                                                          | 7                            |
| Objectives                                                | 7   | Specific objectives or hypotheses                                                                                                                                                                                                                                                                                                                                              | 4                            |
| Trial design                                              | 8   | Description of trial design including type of trial (eg, parallel group, crossover, factorial, single group), allocation ratio, and framework (eg, superiority, equivalence, noninferiority, exploratory)                                                                                                                                                                      | 4                            |
| <b>Methods: Participants, interventions, and outcomes</b> |     |                                                                                                                                                                                                                                                                                                                                                                                |                              |
| Study setting                                             | 9   | Description of study settings (eg, community clinic, academic hospital) and list of countries where data will be collected. Reference to where list of study sites can be obtained                                                                                                                                                                                             | 5                            |
| Eligibility criteria                                      | 10  | Inclusion and exclusion criteria for participants. If applicable, eligibility criteria for study centres and individuals who will perform the interventions (eg, surgeons, psychotherapists)                                                                                                                                                                                   | 5                            |
| Interventions                                             | 11a | Interventions for each group with sufficient detail to allow replication, including how and when they will be administered                                                                                                                                                                                                                                                     | 6                            |
|                                                           | 11b | Criteria for discontinuing or modifying allocated interventions for a given trial participant (eg, drug dose change in response to harms, participant request, or improving/worsening disease)                                                                                                                                                                                 | 16                           |
|                                                           | 11c | Strategies to improve adherence to intervention protocols, and any procedures for monitoring adherence (eg, drug tablet return, laboratory tests)                                                                                                                                                                                                                              | See referenced full protocol |
|                                                           | 11d | Relevant concomitant care and interventions that are permitted or prohibited during the trial                                                                                                                                                                                                                                                                                  | See referenced full protocol |
| Outcomes                                                  | 12  | Primary, secondary, and other outcomes, including the specific measurement variable (eg, systolic blood pressure), analysis metric (eg, change from baseline, final value, time to event), method of aggregation (eg, median, proportion), and time point for each outcome. Explanation of the clinical relevance of chosen efficacy and harm outcomes is strongly recommended | 7,8                          |

|                                                                     |     |                                                                                                                                                                                                                                                                                                                                                          |                              |
|---------------------------------------------------------------------|-----|----------------------------------------------------------------------------------------------------------------------------------------------------------------------------------------------------------------------------------------------------------------------------------------------------------------------------------------------------------|------------------------------|
| Participant timeline                                                | 13  | Time schedule of enrolment, interventions (including any run-ins and washouts), assessments, and visits for participants. A schematic diagram is highly recommended (see Figure)                                                                                                                                                                         | See referenced full protocol |
| Sample size                                                         | 14  | Estimated number of participants needed to achieve study objectives and how it was determined, including clinical and statistical assumptions supporting any sample size calculations                                                                                                                                                                    | 9                            |
| Recruitment                                                         | 15  | Strategies for achieving adequate participant enrolment to reach target sample size                                                                                                                                                                                                                                                                      | 9                            |
| <b>Methods: Assignment of interventions (for controlled trials)</b> |     |                                                                                                                                                                                                                                                                                                                                                          |                              |
| Allocation:                                                         |     |                                                                                                                                                                                                                                                                                                                                                          |                              |
| Sequence generation                                                 | 16a | Method of generating the allocation sequence (eg, computer-generated random numbers), and list of any factors for stratification. To reduce predictability of a random sequence, details of any planned restriction (eg, blocking) should be provided in a separate document that is unavailable to those who enrol participants or assign interventions | 6                            |
| Allocation concealment mechanism                                    | 16b | Mechanism of implementing the allocation sequence (eg, central telephone; sequentially numbered, opaque, sealed envelopes), describing any steps to conceal the sequence until interventions are assigned                                                                                                                                                | 6                            |
| Implementation                                                      | 16c | Who will generate the allocation sequence, who will enrol participants, and who will assign participants to interventions                                                                                                                                                                                                                                | 6                            |
| Blinding (masking)                                                  | 17a | Who will be blinded after assignment to interventions (eg, trial participants, care providers, outcome assessors, data analysts), and how                                                                                                                                                                                                                | 6                            |
|                                                                     | 17b | If blinded, circumstances under which unblinding is permissible, and procedure for revealing a participant's allocated intervention during the trial                                                                                                                                                                                                     | 6                            |
| <b>Methods: Data collection, management, and analysis</b>           |     |                                                                                                                                                                                                                                                                                                                                                          |                              |

|                                                          |                            |     |                                                                                                                                                                                                                                                                                                                                                                                                              |                              |
|----------------------------------------------------------|----------------------------|-----|--------------------------------------------------------------------------------------------------------------------------------------------------------------------------------------------------------------------------------------------------------------------------------------------------------------------------------------------------------------------------------------------------------------|------------------------------|
| 1<br>2<br>3<br>4<br>5<br>6<br>7<br>8<br>9<br>10<br>11    | Data collection methods    | 18a | Plans for assessment and collection of outcome, baseline, and other trial data, including any related processes to promote data quality (eg, duplicate measurements, training of assessors) and a description of study instruments (eg, questionnaires, laboratory tests) along with their reliability and validity, if known. Reference to where data collection forms can be found, if not in the protocol | 6                            |
| 12<br>13<br>14<br>15<br>16<br>17                         |                            | 18b | Plans to promote participant retention and complete follow-up, including list of any outcome data to be collected for participants who discontinue or deviate from intervention protocols                                                                                                                                                                                                                    | 6                            |
| 18<br>19<br>20<br>21<br>22<br>23<br>24<br>25             | Data management            | 19  | Plans for data entry, coding, security, and storage, including any related processes to promote data quality (eg, double data entry; range checks for data values). Reference to where details of data management procedures can be found, if not in the protocol                                                                                                                                            | 6                            |
| 26<br>27<br>28<br>29<br>30<br>31                         | Statistical methods        | 20a | Statistical methods for analysing primary and secondary outcomes. Reference to where other details of the statistical analysis plan can be found, if not in the protocol                                                                                                                                                                                                                                     | 9-13                         |
| 32<br>33<br>34                                           |                            | 20b | Methods for any additional analyses (eg, subgroup and adjusted analyses)                                                                                                                                                                                                                                                                                                                                     | 9-13                         |
| 35<br>36<br>37<br>38<br>39<br>40                         |                            | 20c | Definition of analysis population relating to protocol non-adherence (eg, as randomised analysis), and any statistical methods to handle missing data (eg, multiple imputation)                                                                                                                                                                                                                              | 9-13                         |
| 41<br>42                                                 | <b>Methods: Monitoring</b> |     |                                                                                                                                                                                                                                                                                                                                                                                                              |                              |
| 43<br>44<br>45<br>46<br>47<br>48<br>49<br>50<br>51<br>52 | Data monitoring            | 21a | Composition of data monitoring committee (DMC); summary of its role and reporting structure; statement of whether it is independent from the sponsor and competing interests; and reference to where further details about its charter can be found, if not in the protocol. Alternatively, an explanation of why a DMC is not needed                                                                        | See referenced full protocol |
| 53<br>54<br>55<br>56<br>57<br>58<br>59<br>60             |                            | 21b | Description of any interim analyses and stopping guidelines, including who will have access to these interim results and make the final decision to terminate the trial                                                                                                                                                                                                                                      | 7                            |

|                                 |     |                                                                                                                                                                                                                                                                                     |                                    |
|---------------------------------|-----|-------------------------------------------------------------------------------------------------------------------------------------------------------------------------------------------------------------------------------------------------------------------------------------|------------------------------------|
| Harms                           | 22  | Plans for collecting, assessing, reporting, and managing solicited and spontaneously reported adverse events and other unintended effects of trial interventions or trial conduct                                                                                                   | 14                                 |
| Auditing                        | 23  | Frequency and procedures for auditing trial conduct, if any, and whether the process will be independent from investigators and the sponsor                                                                                                                                         | Information available upon request |
| <b>Ethics and dissemination</b> |     |                                                                                                                                                                                                                                                                                     |                                    |
| Research ethics approval        | 24  | Plans for seeking research ethics committee/institutional review board (REC/IRB) approval                                                                                                                                                                                           | 15                                 |
| Protocol amendments             | 25  | Plans for communicating important protocol modifications (eg, changes to eligibility criteria, outcomes, analyses) to relevant parties (eg, investigators, REC/IRBs, trial participants, trial registries, journals, regulators)                                                    | Information available upon request |
| Consent or assent               | 26a | Who will obtain informed consent or assent from potential trial participants or authorised surrogates, and how (see Item 32)                                                                                                                                                        | 16                                 |
|                                 | 26b | Additional consent provisions for collection and use of participant data and biological specimens in ancillary studies, if applicable                                                                                                                                               | Information available upon request |
| Confidentiality                 | 27  | How personal information about potential and enrolled participants will be collected, shared, and maintained in order to protect confidentiality before, during, and after the trial                                                                                                | 6                                  |
| Declaration of interests        | 28  | Financial and other competing interests for principal investigators for the overall trial and each study site                                                                                                                                                                       | 18                                 |
| Access to data                  | 29  | Statement of who will have access to the final trial dataset, and disclosure of contractual agreements that limit such access for investigators                                                                                                                                     | 16                                 |
| Ancillary and post-trial care   | 30  | Provisions, if any, for ancillary and post-trial care, and for compensation to those who suffer harm from trial participation                                                                                                                                                       | N/A                                |
| Dissemination policy            | 31a | Plans for investigators and sponsor to communicate trial results to participants, healthcare professionals, the public, and other relevant groups (eg, via publication, reporting in results databases, or other data sharing arrangements), including any publication restrictions | 16                                 |

|                            |     |                                                                                                                                                                                                |                              |
|----------------------------|-----|------------------------------------------------------------------------------------------------------------------------------------------------------------------------------------------------|------------------------------|
|                            | 31b | Authorship eligibility guidelines and any intended use of professional writers                                                                                                                 | See referenced full protocol |
|                            | 31c | Plans, if any, for granting public access to the full protocol, participant-level dataset, and statistical code                                                                                | 16                           |
| <b>Appendices</b>          |     |                                                                                                                                                                                                |                              |
| Informed consent materials | 32  | Model consent form and other related documentation given to participants and authorised surrogates                                                                                             | Available upon request       |
| Biological specimens       | 33  | Plans for collection, laboratory evaluation, and storage of biological specimens for genetic or molecular analysis in the current trial and for future use in ancillary studies, if applicable | See referenced full protocol |
